# FORECASTING COVID-19 PANDEMIC: A DATA-DRIVEN ANALYSIS

Khondoker Nazmoon Nabi

*Department of Mathematics, Bangladesh University of Engineering and Technology (BUET), Dhaka-1000, Bangladesh.*

---

## Abstract

In this paper, a new Susceptible-Exposed-Symptomatic Infectious-Asymptomatic Infectious-Quarantined-Hospitalized-Recovered-Dead ( $SEI_D I_U QHRD$ ) deterministic compartmental model has been proposed and calibrated for describing the transmission dynamics of the novel coronavirus disease (COVID-19). A calibration process is executed through the solution of an inverse problem with the help of a Trust-Region-Reflective algorithm, used to determine the best parameter values that would fit the model response. The purpose of this study is to give a tentative prediction of the epidemic peak for Russia, Brazil, India and Bangladesh which could become the next COVID-19 hotspots in no time. Based on the publicly available epidemiological data from late January until 10 May, it has been estimated that the number of daily new symptomatic infectious cases for the above mentioned countries could reach the peak around the beginning of June with the peak size of  $\sim 15,774$  symptomatic infectious cases in Russia,  $\sim 26,449$  cases in Brazil,  $\sim 9,504$  cases in India and  $\sim 2,209$  cases in Bangladesh. Based on our analysis, the estimated value of the basic reproduction number ( $R_0$ ) as of May 11, 2020 was found to be  $\sim 4.234$  in Russia,  $\sim 5.347$  in Brazil,  $\sim 5.218$  in India,  $\sim 4.649$  in the United Kingdom and  $\sim 3.5$  in Bangladesh. Moreover, with an aim to quantify the uncertainty of our model parameters, Latin hypercube sampling-partial rank correlation coefficient (LHS-PRCC) which is a global sensitivity analysis (GSA) method is applied which elucidates that, for Russia, the recovery rate of undetected asymptomatic carriers, the rate of getting home-quarantined or self-quarantined and the transition rate from quarantined class to susceptible class are the most influential parameters, whereas the rate of getting home-quarantined or self-quarantined and the inverse of the COVID-19 incubation period are highly sensitive parameters in Brazil, India, Bangladesh and the United Kingdom which could significantly affect the transmission dynamics of the novel coronavirus. Our analysis also suggests that relaxing social distancing restrictions too quickly could exacerbate the epidemic outbreak in the above mentioned countries.

*Keywords:* Compartmental model, COVID-19, coronavirus, asymptomatic carrier, quarantined class, model calibration, sensitivity.

---

*Email address:* [nabinil@yahoo.com](mailto:nabinil@yahoo.com) (Khondoker Nazmoon Nabi)

**NOTE: This preprint reports new research that has not been certified by peer review and should not be used to guide clinical practice.**

## 1. Introduction

The coronavirus disease 2019 (COVID-19) has become a public health emergency of global concern affecting 212 countries and territories around the world as of May 12, 2020 [Worldometer, \(2020\)](#). It is a respiratory disease caused by the novel coronavirus (SARS-CoV-2) that was first identified in Wuhan, Hubei province, China, late December 2019 [Li et al., \(2020\)](#). This novel virus started transmitting around the world rapidly, and on 30 January, WHO declared the outbreak a Public Health Emergency of International Concern (PHEIC). On 11 March, WHO Director-General marked COVID-19 as a pandemic. As of May 11, 2020, an outbreak of COVID-19 has resulted in 4,271,689 confirmed cumulative cases with reported deaths of 287,613 worldwide [Worldometer, \(2020\)](#). In most of the countries, infected patients are struggling to get the proper treatment due to highly transmissible and virulent nature of the virus. Nevertheless, numerous COVID-19 mitigation strategies has been adapted so far such as quarantine, isolation, promoting the wearing of face masks, travel restrictions, and lockdowns with a view to reducing community transmission of the disease.

In the absence of either proven effective therapy or a vaccine, the rising numbers of infections can overburden the already fragile health care systems of different developed and developing countries in the coming months if the spread is not controlled. This pandemic is giving rise to significant social, economic, and health impacts and has highlighted the significance of detecting the development trend of the disease and prediction of disease future dynamics for designing infectious disease prevention and control strategies, effective public health policies and economical activity guidelines. Different mathematical paradigms have always played a notable role in providing deeper understanding of the transmission mechanisms of a disease outbreak, contributing considerable insights for controlling the disease outbreak. One of the familiar models that is reasonably predictive for human-to-human transmission is Susceptible-Infectious-Removed (SIR) epidemic model proposed by Kermack-Mckendrick in 1927 [Calafiore et al., \(2020\)](#); [Nesteruk \(2020\)](#). After that, the SIR epidemic model has been extended to Susceptible-Exposed-Infectious-Removed (SEIR) model and many of its variants to explore the risk factors of a disease or predict the dynamics of a disease outbreak [Wu et al., \(2020\)](#); [Calafiore et al., \(2020\)](#); [kucharski et al., \(2020\)](#); [Simha et al., \(2020\)](#); [Anastassopoulou et al., \(2020\)](#); [Nesteruk \(2020\)](#). It is really challenging in population based model to incorporate certain real-world complexities. In fact, analysis and prediction could go wrong in the absence of adequate historical real data. On the other hand, different stochastic agent-based models where individuals typically interact on a network structure and exchange infection stochastically, have been established as useful tools for tracing fine-grained effects of heterogeneous intervention policies in diverse epidemic and pandemic settings [Ferguson et al., \(2020\)](#); [Chang et al., \(2020\)](#); [Wilder et al., \(2020\)](#); [Ruiz et al., \(2020\)](#), including for policy advice currently in place in the USA and the UK. However, accuracy of this approach can be a vital issue due to the time-varying nature of network-structure.

Since the outbreak of the virus, [Li et al., \(2020\)](#) proposed a metapopulation structure onto an SEIR-model incorporating travel between major cities in China and considered both documented and undocumented infections. Their model depicts that as many as 86% of all cases went undetected in Wuhan before travel restrictions took effect on January 23, 2020. According to their estimation, on a per person basis,

47 asymptomatic individuals were only 55% as contagious, yet were responsible for 79%  
48 of new infections, given their increased prevalence. The importance of accounting for  
49 asymptomatic individuals has been solidified by other studies [Ferguson et al., \(2020\)](#);  
50 [Verity et al., \(2020\)](#). Later, [Calafiore et al., \(2020\)](#), using a modified SIR-model,  
51 estimated that, on average, cases in Italy went underreported by a factor of 63, as  
52 of March 30, 2020. [Anastassopoulou et al., \(2020\)](#) apply the SIRD model to Chinese  
53 official statistics, estimating parameters using linear regression and predict the COVID-  
54 19 pandemic in Hubei province by using these models and parameters. Nonetheless,  
55 long-term forecasting is debatable while using a simple mathematical model. [Diego](#)  
56 [Caccavo, \(2020\)](#) and [Peter Turchin, \(2020\)](#) independently apply modified SIRD mod-  
57 els, in which parameters change overtime following specific function forms. Parameters  
58 govern these functions are estimated by minimizing the sum-of-square-error. However,  
59 using the sum-of-square method causes over-fitting and always favors a complex model,  
60 therefore it is not suitable to assess policy effectiveness. Moreover, fitting the SIRD  
61 model in the early stage of infection is questionable as well.

62 In the light of above shortcomings of several prior mathematical models, a more  
63 refined deterministic system of nonlinear differential equations, considering all possible  
64 interactions, a Susceptible-Exposed-Symptomatic Infectious-Asymptomatic Infectious-  
65 Quarantined-Hospitalized-Recovered-Dead ( $SEI_D I_U QHRD$ ) model has been proposed,  
66 which can give more accurate and robust short-term as well as long-term predictions  
67 of COVID-19 future dynamics. This model could be considered as a generalization  
68 of SEIR, which is based on the introduction of asymptomatic infectious state, quar-  
69 antined state in order to understand the effect of preventive actions and hospitalized  
70 (isolated) state. Some assumptions are also based on similar studies performed over  
71 SEIR dynamical systems [Wu et al., \(2020\)](#); [Calafiore et al., \(2020\)](#); [Anastassopoulou](#)  
72 [et al., \(2020\)](#). As of May 11, it is evident that how the early stage mathematical model  
73 parameters have changed drastically as detection rate was really low until middle of  
74 February, however the outbreak situation has improved comprehensively in several  
75 countries due to massive scale testing [Qianying et al. \(2020\)](#). We have considered  
76 the nominal values of the model parameters understanding the characteristics of the  
77 coronavirus infection, quantitatively estimated in the literature or published by health  
78 organizations [Read et al., \(2020\)](#); [Li et al., \(2020\)](#); [Wu et al., \(2020\)](#); [Verity et al.,](#)  
79 [\(2020\)](#). In sequence, a rigorous process of model calibration is performed through the  
80 formulation and solution of an inverse problem. Our analysis was based on the pub-  
81 licly available data of the new confirmed daily cases reported for the future probable  
82 COVID-19 hotspots which are Russia, Brazil, India and Bangladesh from late January  
83 until May 09, 2020 [Center for Systems Science and Engineering at Johns Hopkins Uni-](#)  
84 [versity, \(2020\)](#). Further, we have validated our model for the United Kingdom using  
85 same time frame. Based on the released data, we attempted to estimate the mean  
86 values of the crucial epidemiological parameters for COVID-19, such as the infectious-  
87 ness factor for asymptotic carriers, isolation period, the estimation of the inflection  
88 point with probable date, recovery period for both symptomatic and asymptomatic  
89 individuals, case-fatality ratio and mortality rate in those potential hotspots. Perfect  
90 data-driven and curve-fitting methods for the prediction of any disease outbreak have  
91 always been question of interest in epidemiological research. Importantly, for an epi-  
92 demic model to be truly useful it must undergo a judicious process of validation, which

93 consists in comparing model predictions with real-time data in order to evaluate if they  
94 are realistic and useful. In general, the first predictions of a model do not agree with  
95 the observations, possibly due to inadequacies in the model hypotheses or because of a  
96 poor choice of the model nominal parameters. This can invalidate the model, however  
97 model calibration can bring tremendous accuracy, where a set of parameters that pro-  
98 mote a fine agreement between predictions and observations is sought. This approach  
99 could be efficient in order to have considerable insights on disease outbreak dynamics  
100 and to reach worthwhile conclusions in curtailing the disease burden. Furthermore, by  
101 calibrating the parameters of the proposed  $SEI_D I_U QHRD$  model to fit the reported  
102 data, we have also provided probable forecasts until late August.

103 This paper is organized as follows. In section 2, the mathematical model is described  
104 and estimation of nominal values for the model parameters is discussed. In section 3,  
105 the proposed model has been analyzed. In section 4, the forward and inverse problems  
106 are formulated and solved to calibrate the model. In section 5, the main contributions of  
107 this work are emphasized by giving a subsequent comparison between model predictions  
108 and real data. In section 6, one of the robust global sensitivity analysis techniques is  
109 used to quantify the most influential mechanisms in our model. This paper ends with  
110 some qualitative and quantitative observations and discussions.

## 111 2. Formulation of the Mathematical Model

112 In this work, we use a compartmental differential equation model for the spread  
113 of COVID-19 in the world. The spread of the infection starts with the introduction  
114 of a small group of infected individuals to a large population. In this model we focus our  
115 study on eight components of the epidemic flow, i.e.  $\{S(t), E(t), I_D(t), I_U(t), Q(t), H(t), R(t), D(t)\}$   
116 which indicate the number of the susceptible individuals, exposed individuals (infected  
117 however not yet to be infectious, in an incubation period), symptomatic infectious  
118 individuals (confirmed with infectious capacity), asymptomatic infectious individuals  
119 (undetected but infectious), quarantined, hospitalized (under treatment), recovered  
120 cases (immuned) and death cases (or closed cases). Then the entire number of popu-  
121 lation in a certain region or country is  $N = S + E + I_D + I_U + Q + H + R + D$ . The  
122 following assumptions are considered in the formulation of the model:

- 123 • Emigration from the population and immigration into the population have not  
124 been taken into account in model formulation as there is negligible proportion of  
125 individuals move in and out of the population at a specific time frame.
- 126 • Births and natural deaths in the population are not considered.
- 127 • The susceptible population are exposed to a latent class .
- 128 • Hospitalized patients cannot spread disease while in isolation treatment after  
129 confirmed diagnosis.
- 130 • Recovered individuals do not return to susceptible class as they develop certain  
131 immunity against the disease. Hence they cannot become re-infected again and  
132 cannot infect susceptible either.



133 Figure 1 is the flow diagram of the proposed model, where susceptible individu-  
 134 als ( $S$ ) get infected at a baseline infectious contact rate  $\beta$ , via contact with either  
 135 symptomatic infectious individuals ( $I_D$ ) or at a rate  $\beta\lambda$  of asymptomatic infectious  
 136 carriers and move to exposed ( $E$ ) class. Here  $\lambda$  is the relative infectiousness factor of  
 137 asymptomatic carriers (in comparison to symptomatic individuals). The rate of getting  
 138 home-quarantined or self-quarantined of  $S$  is  $q$ , whereas  $\kappa$  is the rate of progression  
 139 of symptoms of COVID-19 (hence  $\frac{1}{\kappa}$  is the mean incubation period of COVID-19).  
 140 Detected symptomatic infected individuals are generated at a proportion  $\sigma_1$  and un-  
 141 detected asymptotically-infected cases are generated at a rate  $\sigma_2$  from the exposed  
 142 class.  $\gamma$  is the rate of confirmation and isolation after symptom onset in detected infec-  
 143 tious individuals and  $1/\gamma$  is the time period when the infection can spread. The rate of  
 144 transition from quarantined to symptomatic infectious, asymptomatic infectious and  
 145 susceptible are  $r_2\eta$ ,  $r_1\eta$  and  $(1 - r_1 - r_2)\eta$  respectively.  $\delta_U$  is the disease-induced death  
 146 rate for undetected asymptomatic patients and  $\delta_H$  is the death rate for hospitalized  
 147 patients.  $\phi_D$ ,  $\phi_U$  and  $\phi_H$  are recovery rates for the symptomatic patients, asymp-  
 148 tomatic carriers and hospitalized patients respectively. In addition,  $1/\phi_D$ ,  $1/\phi_U$  and  
 149  $1/\phi_H$  represent the mean period of isolation for the detected symptomatic infectious in-  
 dividuals, undetected asymptomatic carriers and hospitalized patients. Based on these

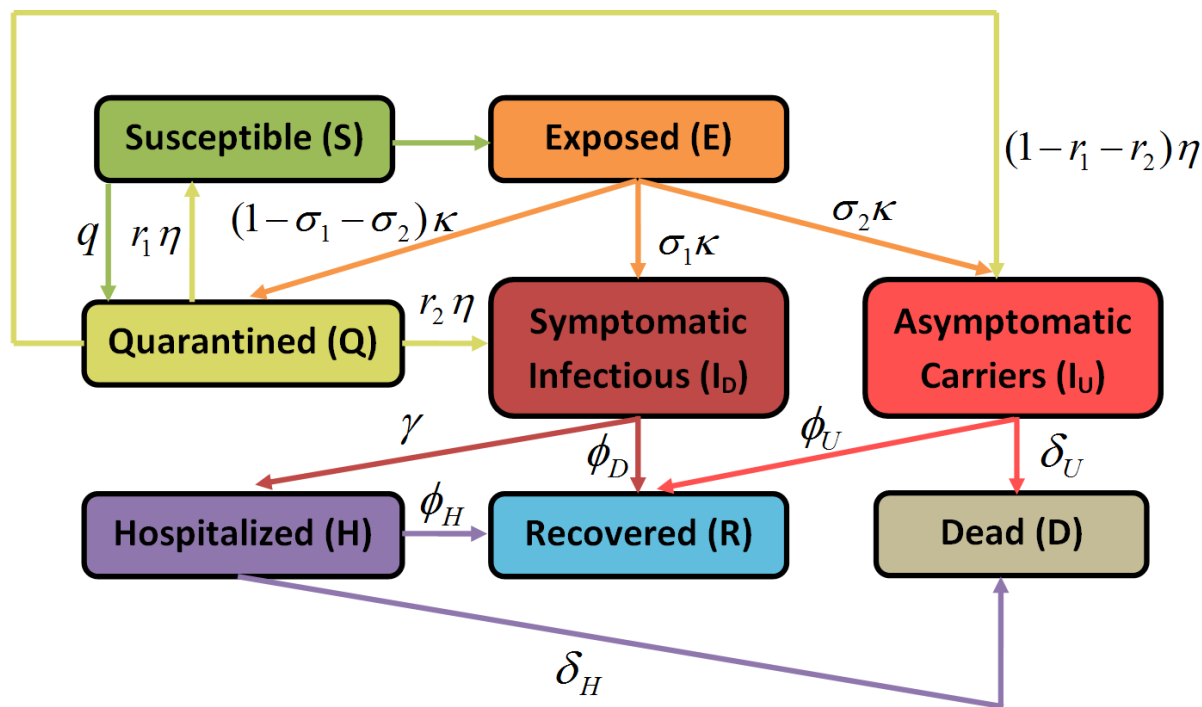

Figure 1: A schematic diagram that illustrates the proposed COVID-19 model

150  
 151 assumptions, the basic model structure for the transmission dynamics of COVID-19 is

152 illustrated by the following deterministic system of nonlinear differential equations (1).

$$\left\{ \begin{array}{l} \frac{dS}{dt} = -\beta S \frac{(I_D + \lambda I_U)}{N - D} + r_1 \eta Q - qS, \\ \frac{dE}{dt} = \beta S \frac{(I_D + \lambda I_U)}{N - D} - \kappa E, \\ \frac{dI_D}{dt} = \sigma_1 \kappa E - \gamma I_D - \phi_D I_D + r_2 \eta Q, \\ \frac{dI_U}{dt} = \sigma_2 \kappa E - \phi_U I_U - \delta_U I_U + (1 - r_1 - r_2) \eta Q \\ \frac{dQ}{dt} = (1 - \sigma_1 - \sigma_2) \kappa E - \eta Q + qS \\ \frac{dH}{dt} = \gamma I_D - \phi_H H - \delta_H H \\ \frac{dR}{dt} = \phi_D I_D + \phi_U I_U + \phi_H H \\ \frac{dD}{dt} = \delta_U I_U + \delta_H H \end{array} \right. \quad (1)$$

### 153 2.1. Baseline epidemiological parameters

154 The incubation period for COVID-19 is estimated to average 5.1 *days* [Lauer et al.,](#)  
 155 [\(2020\)](#), similar to other model-based estimates [Li et al., \(2020\)](#), giving  $\kappa = 1/5.1 \text{ day}^{-1}$ .  
 156 Some previous model-based estimates of infectious duration are on the order of several  
 157 days [Li et al., \(2020\)](#); [Ferguson et al., \(2020\)](#); [Tang et al., \(2020\)](#), with giving about  
 158 7 *days* for asymptomatic individuals to recover. However, the clinical course of the  
 159 disease is typically much longer: In a study of hospitalized patients [Verity et al.,](#)  
 160 [\(2020\)](#), average total duration of illness until hospital discharge or death was 21 *days*,  
 161 and moreover, the median duration of viral shedding was 20 *days* in survivors. The  
 162 effective transmission rate (as a constant),  $\beta$ , ranges from around  $0.2 - 1.5 \text{ day}^{-1}$  in  
 163 prior modeling studies [Shen et al. \(2020\)](#); [Read et al., \(2020\)](#); [Li et al., \(2020\)](#), and  
 164 typically trends down with time [Li et al., \(2020\)](#); [Tang et al., \(2020\)](#). We have left  
 165 this as a free parameter in our fits. Baseline model parameters with brief description,  
 166 likely ranges based on modeling and clinical studies, and default value chosen for the  
 167 study is presented in the Table 1.

### 168 2.2. Dataset

169 The updated epidemic data of five different countries which are Russia, Brazil, In-  
 170 dia, Bangladesh and the United Kingdom is collected from authoritative and known  
 171 sources. The data is gathered from Center of Disease Control and Prevention (CDC)  
 172 and the COVID Tracking Project (testing and hospitalizations). The data repository is  
 173 operated by the Johns Hopkins University Center for Systems Science and Engineering  
 174 (JHU CSSE) and Supported by ESRI Living Atlas Team and the Johns Hopkins Uni-  
 175 versity Applied Physics Lab (JHU APL). The repository is publicly available [Center](#)  
 176 [for Systems Science and Engineering at Johns Hopkins University, \(2020\)](#).

| Parameter  | Definition                                                      | Units      | Likely Range                 | Default Value | References                                                        |
|------------|-----------------------------------------------------------------|------------|------------------------------|---------------|-------------------------------------------------------------------|
| $\beta$    | infectious contact rate                                         | $day^{-1}$ | 0.2 – 1.5                    | 0.5           | Shen et al. (2020); Read et al., (2020); Li et al., (2020)        |
| $\lambda$  | infectiousness factor for undetected infected carrier           | -          | 0.4-0.6                      | 0.5           | Li et al., (2020); Ferguson et al., (2020)                        |
| $r_1$      | fraction of quarantined that become susceptible                 | -          | 0.7-0.99                     | 0.9           | Calibrated                                                        |
| $r_2$      | fraction of quarantined that become detected symptomatic        | -          | 0.005-0.1                    | 0.02          | Calibrated                                                        |
| $\eta$     | transition from quarantined to either infectious or susceptible | $day^{-1}$ | 0.005-0.3                    | 0.01          | Calibrated                                                        |
| $\kappa$   | transition exposed to infectious                                | $day^{-1}$ | $\frac{1}{14} - \frac{1}{3}$ | 1/5.1         | Li et al., (2020); Lauer et al., (2020)                           |
| $q$        | transition susceptible to quarantined                           | $day^{-1}$ | 0.001-0.5                    | 0.01          | Calibrated                                                        |
| $\sigma_1$ | fraction of infections that become detected symptomatic         | -          | 0.0001-0.1                   | 0.0032        | Li et al., (2020); Ferguson et al., (2020); Verity et al., (2020) |
| $\sigma_2$ | fraction of infections that become undetected symptomatic       | -          | 0.01-0.95                    | 0.5           | Calibrated                                                        |
| $\gamma$   | transition detected symptomatic to hospitalized                 | $day^{-1}$ | 0.2-0.9                      | 0.5           | Ferguson et al., (2020); Zhou et al., (2020)                      |
| $\phi_D$   | Recovery rate, detected symptomatic                             | $day^{-1}$ | $\frac{1}{30} - \frac{1}{3}$ | 1/7           | Tang et al., (2020); Zhou et al., (2020)                          |
| $\phi_U$   | Recovery rate, undetected symptomatic                           | $day^{-1}$ | $\frac{1}{30} - \frac{1}{3}$ | 1/7           | Tang et al., (2020); Zhou et al., (2020)                          |
| $\phi_H$   | Recovery rate, Hospitalized                                     | $day^{-1}$ | $\frac{1}{30} - \frac{1}{3}$ | 1/7           | Tang et al., (2020); Zhou et al., (2020)                          |
| $\delta_U$ | Disease induced death rate, undetected symptomatic              | $day^{-1}$ | 0.001-0.1                    | 0.015         | Ferguson et al., (2020)                                           |
| $\delta_H$ | disease induced death rate, hospitalized                        | $day^{-1}$ | 0.001-0.1                    | 0.015         | Ferguson et al., (2020)                                           |

Table 1: Baseline model parameters with brief description, likely ranges based on model calibration and clinical studies, and default value chosen for the study

### 177 3. Analysis of the Model

#### 178 3.1. Disease Free Equilibrium (DFE)

179 The disease-free equilibrium (DFE) of (1) can be obtained easily by setting  $S =$   
 180  $E = I_D = I_U = Q = H = R = D = 0$ . Therefore the DFE of (1) is :

$$E_0 = (S_0^*, E_0^*, I_{D_0}^*, I_{U_0}^*, Q_0^*, H_0^*, R_0^*, D_0^*) = (0, 0, 0, 0, 0)$$

#### 181 3.2. Basic Reproduction Number for Proposed Model

182 The local stability of the DFE is explored using the next generation operator method  
 183 Van den Driessche et al. (2002). Using the notation in Diekmann et al., (1990), it  
 184 follows that the associated non-negative matrix,  $\mathcal{F}$ , for the new infection terms, and  
 185 the non-singular matrix,  $\mathcal{V}$ , for the remaining transfer terms, are given, respectively,  
 186 by :

$$\mathcal{F} = \begin{pmatrix} 0 & \beta & \beta\lambda \\ 0 & 0 & 0 \\ 0 & 0 & 0 \end{pmatrix}$$

188 and

$$\mathcal{V} = \begin{pmatrix} k & 0 & 0 \\ -\sigma_1 k & \gamma + \phi_D & 0 \\ -\sigma_2 k & 0 & \phi_U + \delta_U \end{pmatrix}$$

190 The associated basic reproduction number, denoted by  $\mathcal{R}_0$  is then given by,  
 191  $\mathcal{R}_0 = \rho(\mathcal{F}\mathcal{V}^{-1})$ , where  $\rho$  is the spectral radius of  $\mathcal{F}\mathcal{V}^{-1}$ . It follows that,

$$\mathcal{R}_0 = \frac{\beta [\delta_U \sigma_1 + (\gamma + \phi_D) \lambda \sigma_2 + \sigma_1 \phi_U]}{(\gamma + \phi_D) (\delta_U + \phi_U)} \quad (2)$$

192 Thus, by Theorem 2 of LaSalle (1976), the following result is established.

193 **Lemma 1.** *The DFE,  $E_0$  of the system (1), is locally-asymptotically stable (LAS) if*  
 194  *$\mathcal{R}_0 < 1$ , and unstable if  $\mathcal{R}_0 \geq 1$*

195 The threshold quantity,  $\mathcal{R}_0$ , measures the average number of secondary cases gen-  
 196 erated by a single infected individual in a completely susceptible human population  
 197 Hethcote (2000). The above result implies that a small influx of infected individuals  
 198 would not generate large outbreaks if  $\mathcal{R}_0 < 1$ , and the disease will persist (be endemic)  
 199 in the population if  $\mathcal{R}_0 > 1$ .

### 200 4. Calibration of the epidemic model

201 The proposed epidemic model (1), supplemented by an appropriate set of initial  
 202 conditions, is a continuous-time dynamical system

$$\dot{\mathbf{x}}(t) = \mathbf{f}(x(t), \mathbf{p}), \quad \mathbf{x}(t_0) = \mathbf{x}_0 \quad (3)$$

where  $x(t) = (S(t), E(t), I_D(t), I_U(t), Q(t), H(t), R(t), D(t)) \in \mathbb{R}^8$  is the vector  
 of states at time  $t$ ,  $x_0 = (S^i, E^i, I_D^i, I_U^i, Q^i, H^i, R^i, D^i) \in \mathbb{R}^8$  is a prescribed ini-  
 tial condition vector referring to the initial time  $t_0$  of the analysis, the vector  $\mathbf{p} =$

$(N, \beta, \lambda, r_1, r_2, \eta, k, \sigma_1, \sigma_2, \gamma, q, \phi_D, \phi_U, \phi_H, \delta_U, \delta_H) \in \mathbb{R}^{16}$  aggregates the model parameters and  $\mathbf{f} : U \subset \mathbb{R}^8 \times \mathbb{R}^{16} \rightarrow \mathbb{R}^8$  is a nonlinear map which gives the evolution law of this dynamics, defined (for fixed  $t$ ) on the open set

$$U = \{(\mathbf{x}(t), \mathbf{p}) \in \mathbb{R}^8 \times \mathbb{R}^{16} \mid x_m(t) > 0 \text{ and } p_n > 0, \text{ for } m = 1, 2, \dots, 8 \text{ and } n = 1, \dots, 16\}$$

203 The forward problem consists in providing initial conditions (IC) and a set of pa-  
 204 rameters, represented by the pair  $\alpha = (\mathbf{x}_0, \mathbf{p})$ , and compute by means of numerical  
 205 integration the model response  $\mathbf{x}(t)$  from which a scalar observable  $\psi(\alpha, t)$  is ob-  
 206 tained. In the forward problem,  $\alpha$  represents all IC and system parameters from (1),  
 207 while  $\psi(\alpha, t)$  is the new cases  $\mathcal{N}_w$  system response which can be calculated using daily  
 208 reported cumulative cases real-time data.

209 Since the map  $\mathbf{f}$  has a polynomial nature in  $\mathbf{x}$ , it is continuously differentiable  
 210 function in  $\mathbf{x}$ . Thus, the existence and uniqueness theorem for ordinary differential  
 211 equations guarantees that the initial value problem of (3) has a unique solution. In  
 212 addition, it can also be showed that this solution is continuously dependent on  $\alpha$ , as  
 213 well as the *forward map*  $\psi$  Richard et al., (2012); Yaman et al., (2013).

214 In this work, the evaluation of the system response in the *forward problem* is solved  
 215 numerically by using Runge-kutta (4,5) method and the scalar observable of interest  
 216  $\mathcal{N}_w$  is used to assess the simulation when compared with real data of the COVID-  
 217 19 outbreak made available by Center for Systems Science and Engineering at Johns  
 218 Hopkins University, (2020). The referred data consists of new infected, recovered and  
 219 death cases of COVID-19 per day.

#### 220 4.1. Inverse Problem

221 The model calibration problem seeks to find a set of parameters that, to a certain  
 222 degree, makes the model response as close as possible to the empirical observations  
 223 (reference data), once, due to the errors on model conception and reference data ac-  
 224 quisition, it is (practically) impossible for the *forward map* to reproduce outbreak  
 225 observations.

226 The mathematical setting for this case considers the *parameters vector*  $\alpha$  defined in  
 227 the *parameter space*,  $E = \mathbb{R}^{16}$ , since here  $\alpha$  comprises all IC and system parameters  
 228 from (1), excepting  $N$  (entire population size), which is kept fixed in its nominal  
 229 value. For the purpose of comparison between observations and predictions, a discrete  
 230 set with  $M$  time-instants is considered, so that scalar observations and predictions  
 231 are respectively aggregated into  $\mathbf{y} = (y_1, y_2, \dots, y_M)$  and  $\psi(\alpha) = (\psi_1, \psi_2, \dots, \psi_M)$ ,  
 232 both defined in the *data space*  $F = \mathbb{R}^M$ . Note that the *forward map*  $\psi : E \rightarrow F$   
 233 associates to each parameters vector  $\alpha$  an observable vector  $\psi(\alpha)$  where the component  
 234 represents the number of new cases in each day of the year, i.e.,  $\psi_w = \mathcal{N}_w$ . In  
 235 practice, the parameters vector is restricted to be on the convex set of *admissible*  
 236 *values*,  $C = \{\alpha \in E \mid \mathbf{lb} \leq \alpha \leq \mathbf{ub}\}$  in which  $\mathbf{lb}$  and  $\mathbf{ub}$  are lower and upper vector  
 237 bounds for  $\alpha$ , respectively.

In formal terms, given an *observation vector*  $\mathbf{y} \in F$  and a *prediction vector*  $\psi(\alpha) \in F$ , the calibration aims at finding a vector of parameters  $\alpha^*$  such that

$$\alpha^* = \arg \min_{\alpha \in C} J(\alpha)$$



for a misfit function

$$J(\boldsymbol{\alpha}) = \|\mathbf{y} - \boldsymbol{\psi}(\boldsymbol{\alpha})\|^2 = \left\{ \sum_{m=1}^M |y_m - \psi_m(\boldsymbol{\alpha})|^2 \right\}$$

238 This is the *inverse problem* associated to the epidemic model. In general this type  
239 of extremely nonlinear, with none or low regularity, multiple solutions (or even none),  
240 being much more complicated to crack in comparison with the forward problem [Richard](#)  
241 [et al.](#), (2012); [Yaman et al.](#), (2013).

242 The inverse problem attempts to estimate a finite number of parameters on a finite  
243 dimension space, being defined in terms of a typical nonlinear misfit function. There-  
244 fore, Theorem 4.5.1 of [Chavent](#), (2010) can be invoked to guarantee a proper sense of  
245 well-posedness (existence, uniqueness, unimodality and local stability) for the inverse  
246 problem.

247 The Trust-Region-Reflective method (TRR) is employed here to numerically ap-  
248 proximate a solution for the inverse problem. The core idea of the method is to  
249 minimize a simpler function that represents the behavior of  $J(\boldsymbol{\alpha})$  in a neighborhood  
250 (trust-region) around  $\boldsymbol{\alpha}$ . The simpler function is defined as dependent on the trial  
251 step  $s$ , characterizing the Trust-Region subproblem, and its computation is optimized  
252 by restricting the subproblem to a two-dimensional subspace. The subspace is linear  
253 spanned by a multiple of the gradient  $\mathbf{g}$  and (in the bounded case) a vector obtained in  
254 a scaled modified Newton step, used for the convergence condition  $D(\boldsymbol{\alpha})^{-2}\mathbf{g}(\boldsymbol{\alpha}) = 0$ ,  
255 where  $D$  is a diagonal matrix that depends on  $\boldsymbol{\alpha}$ ,  $\mathbf{g}$ ,  $\mathbf{lb}$ , and  $\mathbf{ub}$  [Coleman](#), (1996).  
256 Eventually, the trial step is constructed through the subproblem as

$$s^* = \arg \min_s \left\{ \frac{1}{2} s^T Q s + g^T s \mid \|Ds\|_2 \leq \Delta \right\} \quad (4)$$

257 where  $\Delta$  is a scalar associated with the trust region size;  $Q$  is a matrix involving  $D$ ,  
258 a Jacobian matrix (also dependent on  $\boldsymbol{\alpha}$ ,  $\mathbf{g}$ ,  $\mathbf{lb}$ , and  $\mathbf{ub}$ ) and an approximation of  
259 the Hessian matrix [Coleman](#), (1996). The quadratic approximation in (4) has well-  
260 behaved solutions [Andrew](#), (2000) and if  $J(\boldsymbol{\alpha} + s) < J(\boldsymbol{\alpha})$  then  $\boldsymbol{\alpha}$  is updated to  $\boldsymbol{\alpha} + s$   
261 and the process iterates, otherwise  $\Delta$  is decreased. In addition, a reflection step also  
262 occurs if a given step intersects a bound: the reflected step is equivalent to the original  
263 step except in the intersecting dimension, where it assumes the opposite value after  
264 reflection.

265 The TRR algorithm also requires an initial guess for each parameter, identified in  
266 the next section as “TRR input”. The stopping criteria are the norm of the step and  
267 the change in the value of the objective function, with a tolerance of  $10^{-9}$ .

## 268 5. Numerical Experiments and Forecasting

269 In this section, we have used dynamically calibrated compartment model for real-  
270 time analysis and real-time prediction of COVID-19 outbreak for five different countries  
271 which are Russia, Brazil, India, Bangladesh and the United Kingdom. Figure 2, 4, 6,  
272 8, 10 illustrates the best result for the  $\mathcal{N}_w$  system response fitting problem using the  
273 nominal parameters from Table 1 as initial guesses for the TRR algorithm. The upper

| Parameter  | TRR input | lb     | ub    | TRR output | References                                   |
|------------|-----------|--------|-------|------------|----------------------------------------------|
| $\beta$    | 0.4       | 0.2    | 1.5   | 0.4852     | Shen et al., (2020); Li et al., (2020)       |
| $\lambda$  | 0.45      | 0.4    | 0.6   | 0.5249     | Li et al., (2020); Ferguson et al., (2020)   |
| $r_1$      | 0.76      | 0.1    | 0.999 | 0.9810     | Estimated                                    |
| $r_2$      | 0.03      | 0.01   | 0.9   | 0.0224     | Estimated                                    |
| $\eta$     | 0.05      | 0.01   | 0.9   | 0.0779     | Estimated                                    |
| $\kappa$   | 0.196     | 1/14   | 1/3   | 0.2443     | Li et al., (2020); Lauer et al., (2020)      |
| $\sigma_1$ | 0.01      | 0.0001 | 0.9   | 0.0067     | Li et al., (2020); Ferguson et al., (2020)   |
| $\sigma_2$ | 0.5       | 0.01   | 0.95  | 0.6894     | Estimated                                    |
| $\gamma$   | 0.3       | 0.1    | 0.9   | 0.7297     | Ferguson et al., (2020); Zhou et al., (2020) |
| $\phi_D$   | 0.1428    | 1/30   | 1/3   | 0.3332     | Tang et al., (2020); Zhou et al., (2020)     |
| $\phi_U$   | 0.1428    | 1/30   | 1/3   | 0.0401     | Tang et al., (2020); Zhou et al., (2020)     |
| $\phi_H$   | 0.1428    | 1/30   | 1/3   | 0.0433     | Tang et al., (2020); Zhou et al., (2020)     |
| $\delta_U$ | 0.09      | 0.001  | 0.01  | 0.0013     | Ferguson et al., (2020)                      |
| $\delta_H$ | 0.09      | 0.001  | 0.01  | 0.0095     | Ferguson et al., (2020)                      |
| $q$        | 0.015     | 0.01   | 0.5   | 0.0107     | Estimated                                    |

Table 2: TRR setup for the Figure 3 calibrated response

274 and lower bounds used for the parameters were set compatible with the literature  
 275 suggested intervals and are also presented in 2, 3, 4, 5, 6 along with the parameters  
 276 resulted from the calibration (“TRR output”). The minimum for  $S$  was set to  $0.8N$   
 277 to establish a high number of susceptible individuals as expected for the beginning of  
 278 an outbreak.

### 279 5.1. Analysis and prediction for Russia

280 With much of Europe now easing itself out of confinement, Russia could become  
 281 the continent’s new Covid-19 hotspot according to our analysis. The model fitting and  
 282 projection results for Russia from early February to late August are shown in Figure  
 283 2 and 3. We took real data from February 01 to May 08, 2020 to calibrate the model  
 284 parameters.

285 As we can see the results from the proposed model match the real data very well.  
 286 Based on the proposed model, we want to project that from Figure 3, the number  
 287 of daily detected symptomatic infectious cases in Russia will reach the peak at May  
 288 27 with about 15.774K cases. As time progresses, the projected error goes down and  
 289 is limited about 10% for the cumulative cases and daily new cases according to our  
 290 calculated daily projected mean error. The basic reproduction number is 4.234 as  
 291 of May 08, which is close to the observed basic reproduction number for COVID-19,  
 292 estimated about 2-7 for COVID-19 Liu et al., (2020). The number of cumulative  
 293 infected cases is projected to reach 970K around August 30, and the estimated total  
 294 death cases will reach to about 35K in the end. To date, Russia’s official death toll of  
 295 1,827 is relatively low because not all deaths of people who have contracted the virus are  
 296 being counted as Covid-19 deaths. The upper and lower bounds used for the parameters  
 297 were set compatible with the literature suggested intervals and are presented in Table 2,  
 298 along with the parameters and IC values resulted from the calibration (“TRR output”).

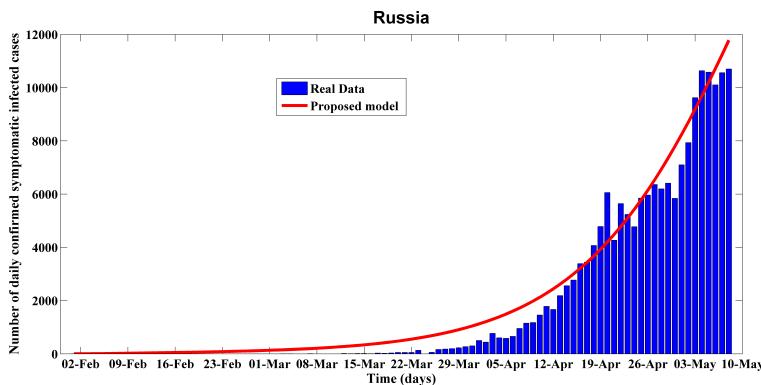

(a) The number of daily detected symptomatic infectious cases measured and fitted from early February to early May, 2020

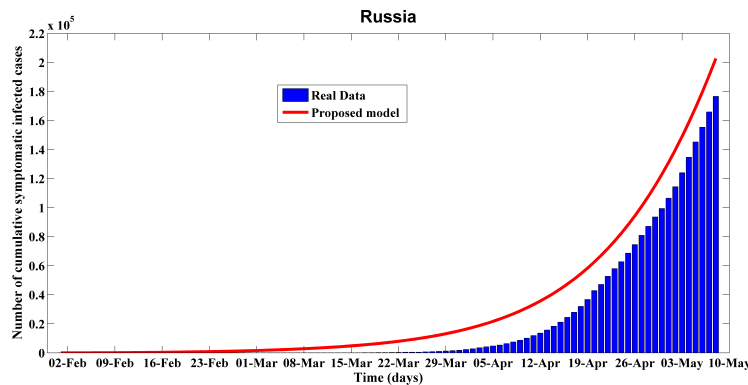

(b) The number of cumulative detected symptomatic infectious cases cases measured and fitted from early February to early May, 2020

Figure 2: Fitting performance of calibrated  $SEI_D I_U QHRD$  model for Russia from February 1 to May 08, 2020

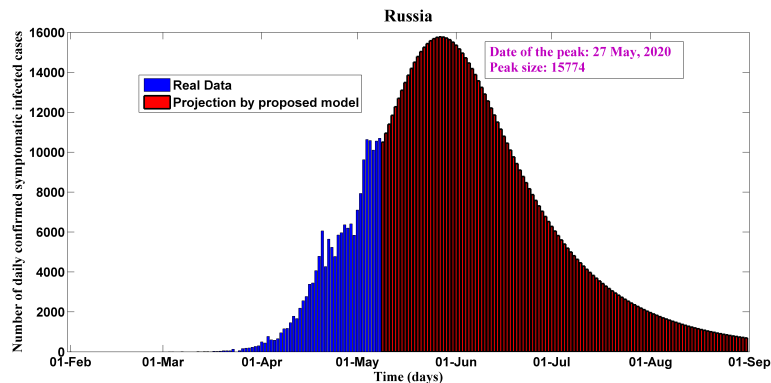

(a) The number of daily detected symptomatic infectious cases measured and projected for Russia from early February to late August, 2020

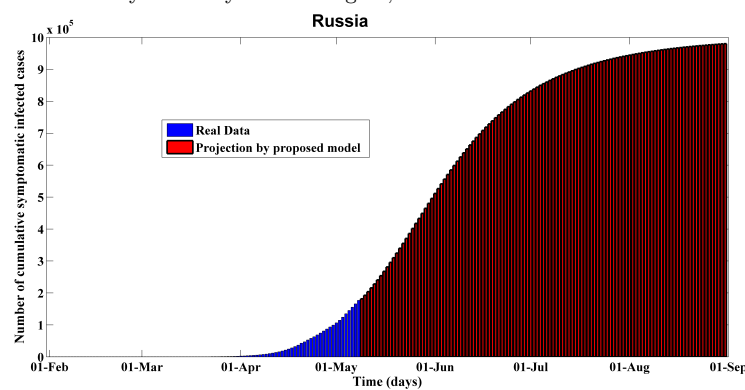

(b) The number of cumulative detected symptomatic infectious cases measured and projected for Russia from early February to late August, 2020

Figure 3: Predictions of the proposed  $SEI_D I_U QHRD$  model for Russia from early March to late August, 2020

## 299 5.2. Analysis and prediction for Brazil

300 The coronavirus disease 2019 (COVID-19) pandemic reached Latin America later  
 301 than other continents. The first case recorded in Brazil was on Feb 25, 2020. But now,  
 302 Brazil has the most cases and deaths in Latin America (155939 cases and 10627 deaths  
 303 as of May 9), and these are probably substantial underestimates. Our analysis projects  
 304 that Brazil is developing as one of the world's next coronavirus hotspots. The model  
 305 fitting and projection results for Brazil from late February to late August are shown  
 306 in Figure 4 and 5. We took real data from February 25 to May 08 to calibrate the  
 307 model parameters. As we can see the results from the proposed model fit the real data  
 308 very well. Based on the proposed model, we project that from Figure 5, the number of  
 309 daily detected symptomatic infectious cases in Brazil seem reaching the peak around  
 310 June 11 with about 26.449K cases. The basic reproduction number is estimated about  
 311 5.3467 as of May 11, which is in between the observed basic reproduction number  
 312 for COVID-19, estimated about 2-7 for COVID-19 [Liu et al., \(2020\)](#). This crucial  
 313 epidemiological parameter could blow up because of scant diagnostics and impermanent  
 314 non-pharmaceutical interventions. The case-fatality rate is hovering around 9.3% as of  
 315 May 11, which is necessary to assess how much community transmission has occurred  
 316 and its burden. According to our projection, this ratio could be doubled within two

| Parameter  | TRR input | lb     | ub    | TRR output | References                                     |
|------------|-----------|--------|-------|------------|------------------------------------------------|
| $\beta$    | 0.3       | 0.2    | 1.5   | 0.5155     | Shen et al., (2020); Li et al., (2020)         |
| $\lambda$  | 0.45      | 0.4    | 0.6   | 0.5855     | Li et al., (2020); Ferguson et al., (2020)     |
| $r_1$      | 0.76      | 0.1    | 0.999 | 0.9855     | Estimated                                      |
| $r_2$      | 0.03      | 0.01   | 0.9   | 0.0159     | Estimated                                      |
| $\eta$     | 0.05      | 0.01   | 0.9   | 0.0897     | Estimated                                      |
| $\kappa$   | 0.196     | 1/14   | 1/3   | 0.1867     | Li et al., (2020); Lauer et al., (2020)        |
| $\sigma_1$ | 0.01      | 0.0001 | 0.9   | 0.0072     | Moriarty et al., (2020); Verity et al., (2020) |
| $\sigma_2$ | 0.5       | 0.1    | 0.95  | 0.7308     | Estimated                                      |
| $\gamma$   | 0.3       | 0.1    | 0.9   | 0.7        | Ferguson et al., (2020); Zhou et al., (2020)   |
| $\phi_D$   | 0.1428    | 1/30   | 1/3   | 0.3333     | Tang et al., (2020); Zhou et al., (2020)       |
| $\phi_U$   | 0.1428    | 1/30   | 1/3   | 0.0356     | Tang et al., (2020); Zhou et al., (2020)       |
| $\phi_H$   | 0.1428    | 1/30   | 1/3   | 0.0431     | Tang et al., (2020); Zhou et al., (2020)       |
| $\delta_U$ | 0.09      | 0.001  | 0.01  | 0.001      | Ferguson et al., (2020)                        |
| $\delta_H$ | 0.09      | 0.001  | 0.01  | 0.009      | Ferguson et al., (2020)                        |
| $q$        | 0.015     | 0.01   | 0.5   | 0.04       | Estimated                                      |

Table 3: TRR setup for the Figure 5 calibrated response

317 months. The number of cumulative infected cases is projected to reach 1800K around  
 318 August 30 if current trend is held, and the estimated total death cases will reach to  
 319 about 108K in the end. The upper and lower bounds used for the parameters were set  
 320 compatible with the literature suggested intervals and are presented in Table 3, along  
 321 with the parameters and IC values resulted from the calibration (“TRR output”).



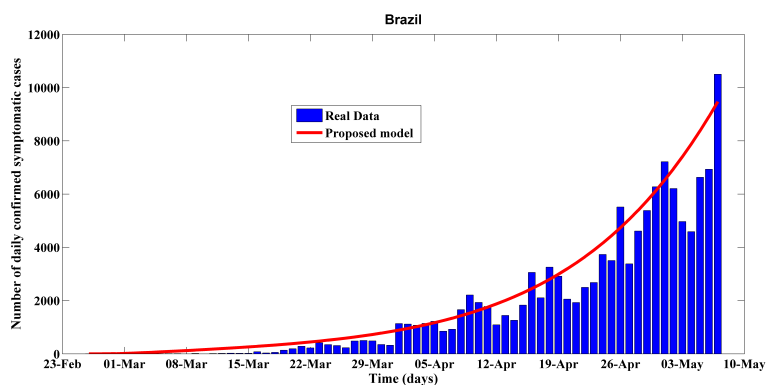

(a) The number of daily detected symptomatic infectious cases measured and fitted from late February to early May, 2020

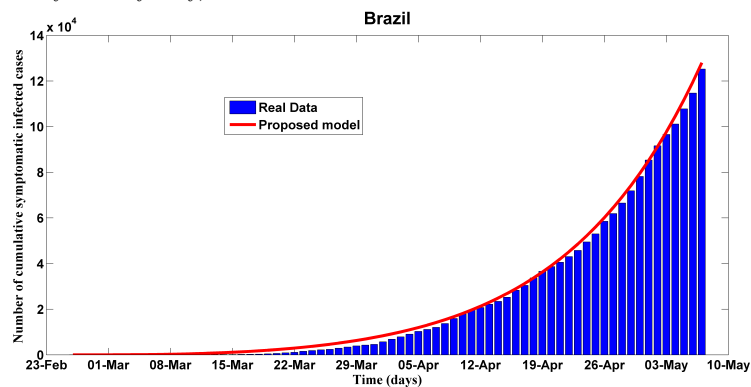

(b) The number of cumulative detected symptomatic infectious cases cases measured and fitted from late February to early May, 2020

Figure 4: Fitting performance of calibrated  $SEI_D I_U QHRD$  model for Brazil from 26 February to 8 May, 2020

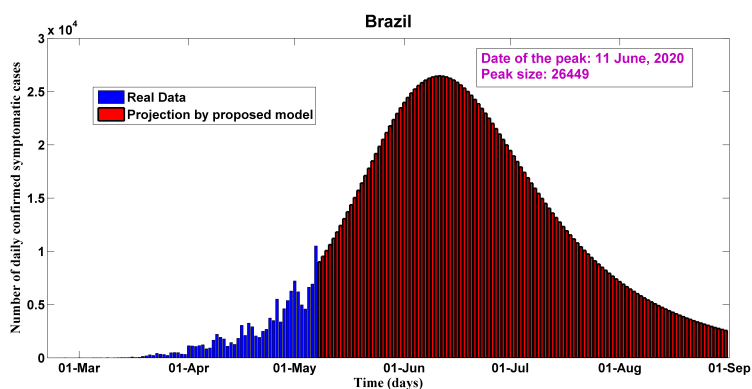

(a) The number of daily detected symptomatic infectious cases measured and projected for Brazil from late February to late August, 2020

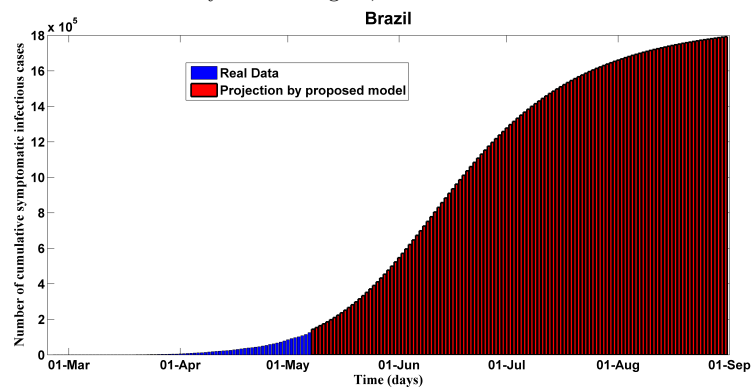

(b) The number of cumulative detected symptomatic infectious cases measured and projected for Brazil from late February to late August, 2020

Figure 5: Predictions of the proposed  $SEI_D I_U QHRD$  model for Brazil from late February to late August, 2020

### 322 5.3. Analysis and prediction for India

323 Some people might think about the possibilities of the presence of a less virulent  
324 strain of the virus in India, along with the possibility that its hot weather could di-  
325 minish the contagion. Nevertheless, our mathematical analysis suggests that India  
326 could become the new Covid-19 hotspot in South Asia. According to our projection,  
327 India could continue seeing spikes in the number of cases as it time progresses de-  
328 spite of following lockdown and other disease mitigation measures. The first case of  
329 the COVID-19 pandemic in India was reported on 30 January 2020, originating from  
330 China. But now, India has the most cases and deaths in South Asia (62,808 cases  
331 and 2,101 deaths as of May 9), and these are probably substantial underestimates.  
332 Figure 6 and 7 illustrate COVID-19 disease modeling and prediction for India from  
333 late January to late August. We took real-time data from January 30 to May 8 to  
334 calibrate the model parameters. As we can see, our proposed model match well for  
335 the historical real data. Based on our prediction from Figure 7, the number of daily  
336 detected symptomatic infectious cases in India seem reaching the peak around June 15  
337 with about 9.504K cases. The basic reproduction number is 5.218 as of May 11, which  
338 lies between the studied observations [Liu et al., \(2020\)](#). This estimation may be con-  
339 sidered as an overestimation of this critical parameter. Notwithstanding, this is owing  
340 to the infectiousness factor of the asymptomatic spreaders. The asymptomatic and  
341 minimally or moderately symptomatic should be quarantined to avoid the spread of  
342 the virus, with the severely symptomatic managed and isolated in health care settings.  
343 Contact tracing could be carried out to find those at risk of being in the incubation pe-  
344 riod by virtue of their exposure. The number of cumulative infected cases is projected  
345 to reach 730K around August 30 if current pattern is held, and the estimated total  
346 death cases will reach to about 43.8K in the end. The upper and lower bounds used  
347 for the parameters were set compatible with the literature suggested intervals and are  
348 presented in Table 4, along with the parameters values resulted from the calibration  
349 (“TRR output”). Interestingly, we have found in our analysis that India’s case-fatality  
350 rate is at 3.5% and the country’s recovery rate is at 33% which commensurate with  
351 real reported statistics precisely.

| Parameter  | TRR input | lb     | ub    | TRR output | References                                     |
|------------|-----------|--------|-------|------------|------------------------------------------------|
| $\beta$    | 0.3       | 0.2    | 1.5   | 0.3995     | Shen et al. (2020); Li et al., (2020)          |
| $\lambda$  | 0.4       | 0.4    | 0.6   | 0.5995     | Li et al., (2020); Ferguson et al., (2020)     |
| $r_1$      | 0.76      | 0.1    | 0.999 | 0.9911     | Estimated                                      |
| $r_2$      | 0.03      | 0.01   | 0.9   | 0.01       | Estimated                                      |
| $\eta$     | 0.05      | 0.01   | 0.9   | 0.0997     | Estimated                                      |
| $\kappa$   | 0.196     | 1/14   | 1/3   | 0.3296     | Li et al., (2020); Lauer et al., (2020)        |
| $\sigma_1$ | 0.01      | 0.0001 | 0.1   | 0.00046    | Moriarty et al., (2020); Verity et al., (2020) |
| $\sigma_2$ | 0.5       | 0.1    | 0.95  | 0.7495     | Estimated                                      |
| $\gamma$   | 0.3       | 0.1    | 0.9   | 0.8        | Ferguson et al., (2020); Zhou et al., (2020)   |
| $\phi_D$   | 0.1428    | 1/30   | 1/3   | 0.3333     | Tang et al., (2020); Zhou et al., (2020)       |
| $\phi_U$   | 0.1428    | 1/30   | 1/3   | 0.0334     | Tang et al., (2020); Zhou et al., (2020)       |
| $\phi_H$   | 0.1428    | 1/30   | 1/3   | 0.3335     | Tang et al., (2020); Zhou et al., (2020)       |
| $\delta_U$ | 0.09      | 0.001  | 0.01  | 0.001      | Ferguson et al., (2020)                        |
| $\delta_H$ | 0.09      | 0.001  | 0.01  | 0.01       | Ferguson et al., (2020)                        |
| $q$        | 0.015     | 0.01   | 0.5   | 0.0507     | Estimated                                      |

Table 4: TRR setup for the Figure 7 calibrated response

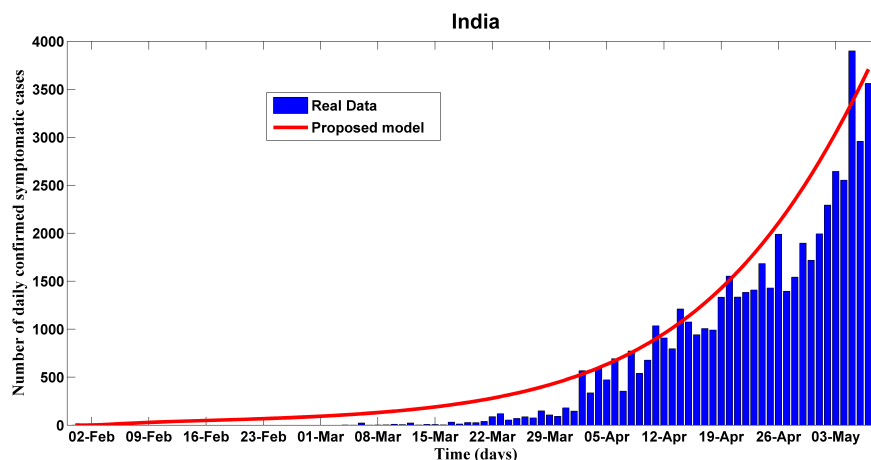

(a) The number of daily detected symptomatic infectious cases measured and fitted from early March to early May, 2020

Figure 6: Fitting performance of calibrated  $SEI_D I_U QHRD$  model for India from 8 March to early May, 2020

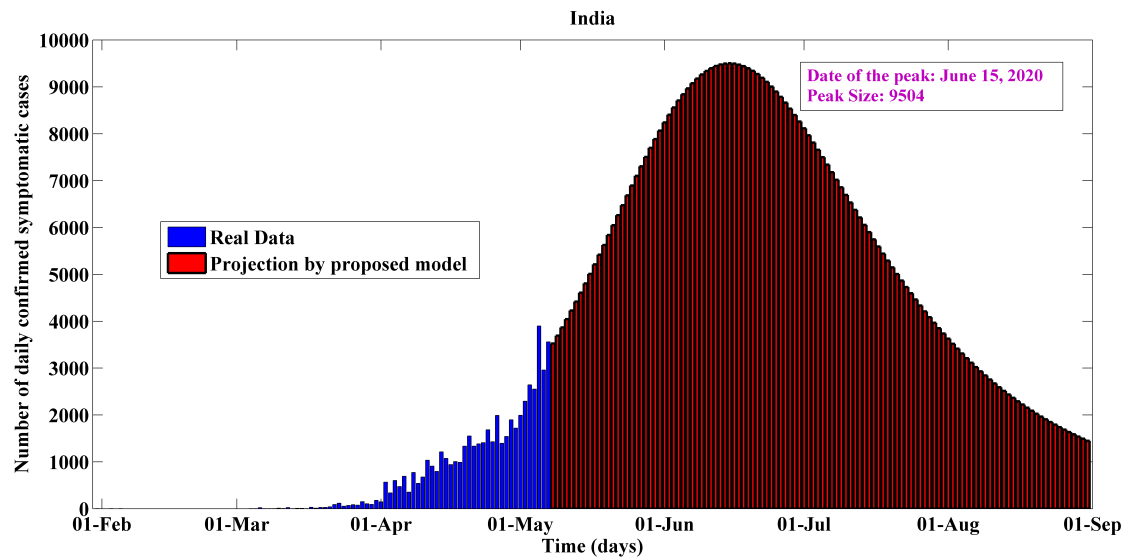

(a) The number of daily detected symptomatic infectious cases measured and projected for India from late January to late August, 2020

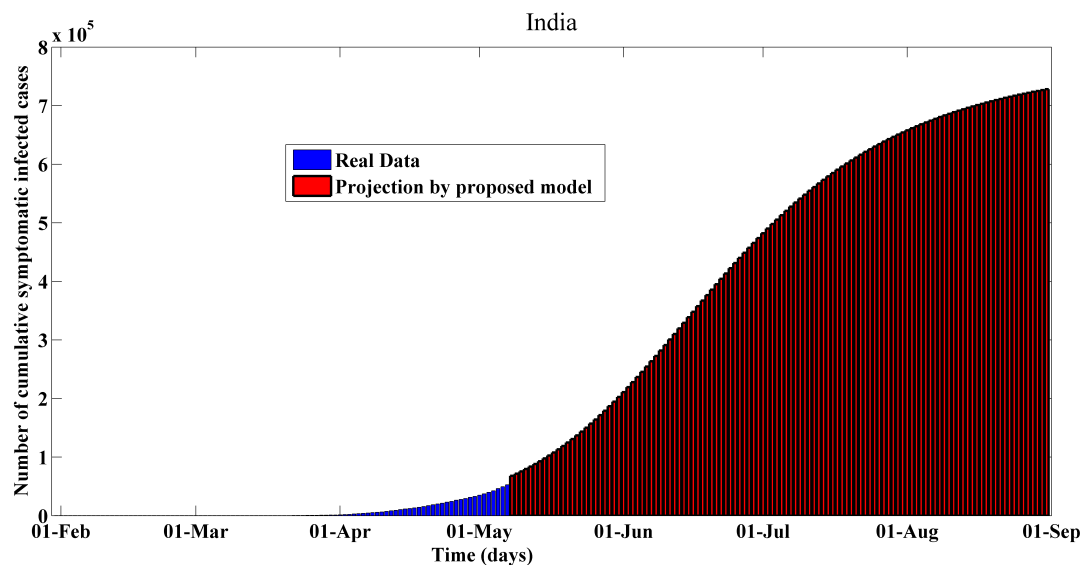

(b) The number of cumulative detected symptomatic infectious cases measured and projected for India from early March to late August, 2020

Figure 7: Predictions of the proposed  $SEI_D I_U QHRD$  model for India from late January to late August, 2020

#### 352 5.4. Analysis and prediction for the United Kingdom

353 Our analysis indicates that the United Kingdom could face risk of a second wave of  
 354 coronavirus infections as the United Kingdom gradually eases a nationwide lockdown.  
 355 According to [Worldometer, \(2020\)](#), by 11 May there had been 223,060 confirmed cases  
 356 and 32,065 deaths overall a rate of 465 deaths per million population . The outbreak  
 357 in London has the highest number and highest rate of infections, while England and  
 358 Wales are the UK countries with the highest recorded death rate per capita. The  
 359 prime minister of the UK is expected to unveil a coronavirus warning system when  
 360 he outlines his plans to gradually ease the lockdown while dropping the “stay home”



| Parameter  | TRR input | lb     | ub    | TRR output | References                                     |
|------------|-----------|--------|-------|------------|------------------------------------------------|
| $\beta$    | 0.3       | 0.2    | 1.5   | 0.73       | Shen et al. (2020); Li et al., (2020)          |
| $\lambda$  | 0.4       | 0.4    | 0.6   | 0.59       | Li et al., (2020); Ferguson et al., (2020)     |
| $r_1$      | 0.76      | 0.6    | 0.999 | 0.97       | Estimated                                      |
| $r_2$      | 0.03      | 0.01   | 0.1   | 0.024      | Estimated                                      |
| $\eta$     | 0.05      | 0.04   | 0.1   | 0.09       | Estimated                                      |
| $\kappa$   | 0.196     | 1/14   | 1/3   | 0.3333     | Li et al., (2020); Lauer et al., (2020)        |
| $\sigma_1$ | 0.01      | 0.0001 | 0.01  | 0.0044     | Moriarty et al., (2020); Verity et al., (2020) |
| $\sigma_2$ | 0.5       | 0.3    | 0.95  | 0.37       | Estimated                                      |
| $\gamma$   | 0.3       | 0.1    | 0.9   | 0.79       | Ferguson et al., (2020); Zhou et al., (2020)   |
| $\phi_D$   | 0.1428    | 1/30   | 1/3   | 0.3333     | Tang et al., (2020); Zhou et al., (2020)       |
| $\phi_U$   | 0.1428    | 1/30   | 1/3   | 0.0542     | Tang et al., (2020); Zhou et al., (2020)       |
| $\phi_H$   | 0.1428    | 1/30   | 1/3   | 0.0333     | Tang et al., (2020); Zhou et al., (2020)       |
| $\delta_U$ | 0.09      | 0.001  | 0.01  | 0.001      | Ferguson et al., (2020)                        |
| $\delta_H$ | 0.09      | 0.001  | 0.01  | 0.001      | Ferguson et al., (2020)                        |
| $q$        | 0.015     | 0.01   | 0.5   | 0.015      | Estimated                                      |

Table 5: TRR setup for the Figure 9 calibrated response

361 slogan. For the UK, the modeling and projection results from January 31 to August 31  
362 are shown in Figure 8 and 9. As we can see from Figure 9, the number of daily detected  
363 symptomatic infectious cases reached the peak around April 10. Since then the curve  
364 has been maintaining a plateau which is a really unusual scenario. This phenomenon  
365 has closely been captured by our proposed model. This case study was really important  
366 for the validation of our model. In fact, this elucidates the fact that this model can give  
367 more precise and robust short-term predictions of COVID-19 dynamics. According to  
368 our calculation, the basic reproduction number is around 4.649 as of May 09, which is  
369 close to the observed basic reproduction number for COVID-19, estimated about 2-7  
370 for COVID-19 Liu et al., (2020). The number cumulative infected cases is projected  
371 to reach 618K around August 30, and the estimated total death cases will reach to  
372 about 63.48K in the above mentioned period. Importantly, as of May 11, we have  
373 found in our analysis that the UK’s case-fatality rate is at 17.2%, which is the worst  
374 among our five studied cases. This could exacerbate as time progresses in the absence  
375 of proven effective therapy or a vaccine. In addition, Our study suggests that relaxing  
376 social distancing too quickly could cause thousands of additional death in the UK.  
377 The upper and lower bounds used for the parameters were set compatible with the  
378 literature suggested intervals and are presented in Table 5, along with the parameters  
379 values resulted from the calibration (“TRR output”).

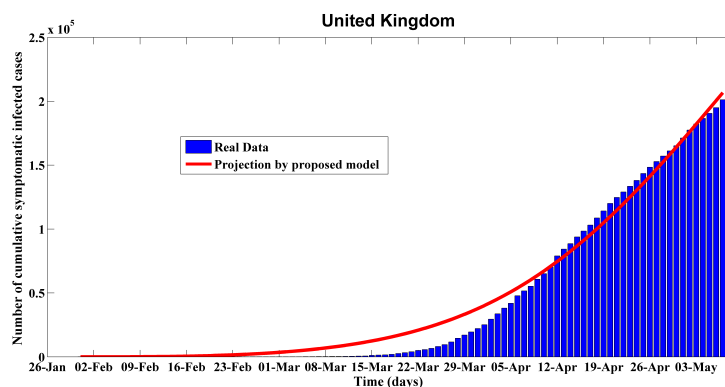

(a)

Figure 8: Fitting performance of calibrated  $SEI_D I_U QHRD$  model for the United Kingdom from 31 January to early May, 2020

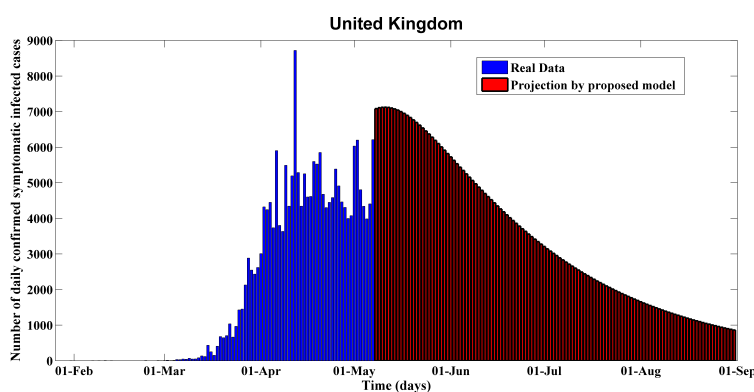

(a) The number of daily detected symptomatic infectious cases measured and projected for the United Kingdom from late January to late August, 2020

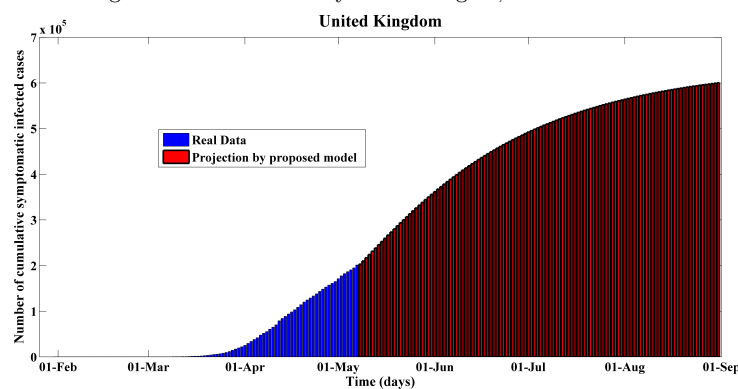

(b) The number of cumulative detected symptomatic infectious cases measured and projected for India from late January to late August, 2020

Figure 9: Predictions of the proposed  $SEI_D I_U QHRD$  model for the United Kingdom from late January to late August, 2020

| Parameter  | TRR input | lb     | ub    | TRR output | Reference                                      |
|------------|-----------|--------|-------|------------|------------------------------------------------|
| $\beta$    | 0.3       | 0.2    | 1.5   | 0.3972     | Shen et al., (2020); Li et al., (2020)         |
| $\lambda$  | 0.4       | 0.4    | 0.6   | 0.5498     | Li et al., (2020); Ferguson et al., (2020)     |
| $r_1$      | 0.76      | 0.1    | 0.999 | 0.9454     | Estimated                                      |
| $r_2$      | 0.03      | 0.01   | 0.9   | 0.02       | Estimated                                      |
| $\eta$     | 0.05      | 0.01   | 0.9   | 0.06       | Estimated                                      |
| $\kappa$   | 0.196     | 1/14   | 1/3   | 0.0714     | Li et al., (2020); Lauer et al., (2020)        |
| $\sigma_1$ | 0.01      | 0.0001 | 0.9   | 0.001      | Moriarty et al., (2020); Verity et al., (2020) |
| $\sigma_2$ | 0.5       | 0.3    | 0.98  | 0.95       | Estimated                                      |
| $\gamma$   | 0.3       | 0.1    | 0.9   | 0.5        | Ferguson et al., (2020); Zhou et al., (2020)   |
| $\phi_D$   | 0.1428    | 1/30   | 1/3   | 0.3333     | Tang et al., (2020); Zhou et al., (2020)       |
| $\phi_U$   | 0.1428    | 1/30   | 1/3   | 0.0333     | Tang et al., (2020); Zhou et al., (2020)       |
| $\phi_H$   | 0.1428    | 1/30   | 1/3   | 0.3275     | Tang et al., (2020); Zhou et al., (2020)       |
| $\delta_U$ | 0.09      | 0.001  | 0.01  | 0.0011     | Ferguson et al., (2020)                        |
| $\delta_H$ | 0.09      | 0.001  | 0.01  | 0.01       | Ferguson et al., (2020)                        |
| $q$        | 0.015     | 0.01   | 0.5   | 0.012      | Estimated                                      |

Table 6: TRR setup for the Figure 11 calibrated response

### 380 5.5. Analysis and prediction for Bangladesh

381 For Bangladesh, the modeling and projection results from early March to late Au-  
382 gust of are shown in Figure 10 and Figure 11. On 22 March, Bangladesh imposed a  
383 nationwide lockdown effective from 26 March to curb the spread of the novel coron-  
384 avirus in the wake of four deaths and at least 39 infections. Notice that, there are  
385 some jumps in the number of confirmed daily new infected cases data from 16 april  
386 to 20 april due to the increase of limited testing system (from 2000 samples to 2700  
387 samples per day) [Institute of Epidemiology, Disease Control and Research \(IEDCR\)](#).  
388 Bangladesh is still struggling (around 6700 samples per day) [Institute of Epidemiology,  
389 Disease Control and Research \(IEDCR\)](#) to incorporate massive scale testing as of May  
390 11, 2020. Despite the fact, as we can see from Figure 10, our proposed model fits well  
391 for the historical data. As time progresses, the projected error goes down and is limited  
392 about 10% for the cumulative cases and daily new cases according to our calculated  
393 daily projected mean error. Though the estimated case-fatality rate in Bangladesh is at  
394 2.5% which is really, without massive scale testing this rate could rise sharply incoming  
395 days. Moreover, the country’s estimated recovery rate is at 24% which complements  
396 the real statistics precisely. The upper and lower bounds used for the parameters were  
397 set compatible with the literature suggested intervals and are presented in Table 6,  
398 along with the values of the model parameters resulted from the calibration (“TRR  
399 output”).

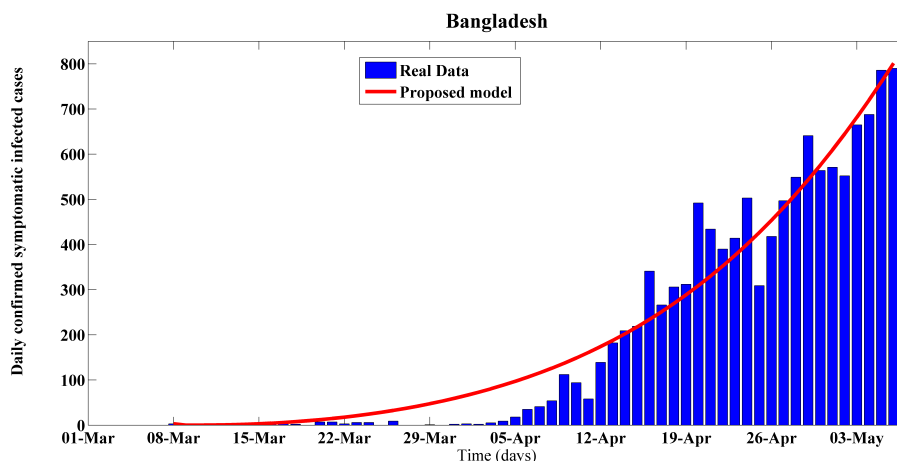

(a) The number of daily detected symptomatic infectious cases measured and fitted from early March to early May, 2020

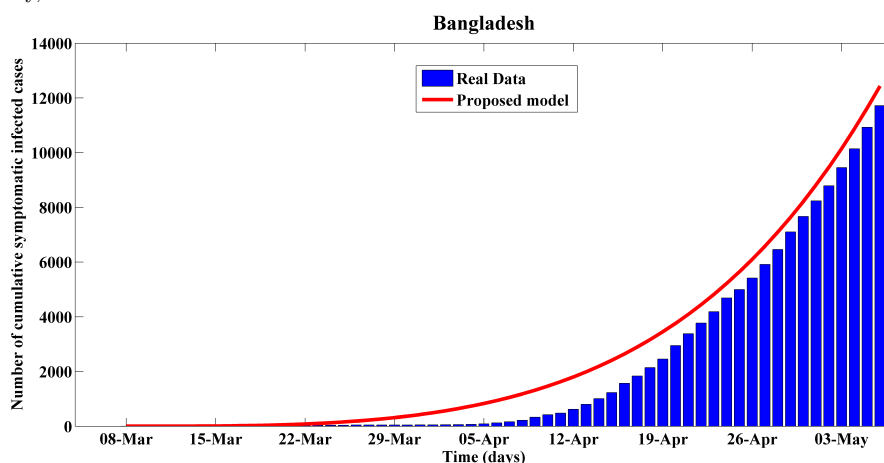

(b) The number of cumulative detected symptomatic infectious cases measured and fitted from early March to early May, 2020

Figure 10: Fitting performance of calibrated  $SEI_D I_U QHRD$  model for Bangladesh from 8 March to early May, 2020

400 On 4 May, Bangladesh authorities intended to open up more factories, shopping  
 401 malls and logistics operations, as they could diminish the economic impact of a coron-  
 402 avirus lockdown which they extended to May 16 [Ministry of Health & Family Welfare](#)  
 403 [of Bangladesh](#), (2020). This ease of lockdown could worsen the ongoing community  
 404 transmission drastically. As we can see from Figure 11, the daily detected symptomatic  
 405 infected cases (confirmed) will reach the peak (about 2209) around June 11, 2020 and  
 406 then start to de-escalate. However, the probable peak time could occur in no time due  
 407 to easing the coronavirus lockdown too quickly and this could bring a second wave of  
 408 infections in the outbreak after post-peak period. The effective reproduction number is  
 409 around 3.5 as of May 11, which is close to the observed basic reproduction number for  
 410 COVID-19, estimated about 2-7 for COVID-19 [Liu et al.](#), (2020). Our estimation is  
 411 relatively high which due to the fact that we have considered the infectiousness factor  
 412 of the asymptomatic carriers. Massive level of testing is highly required to identify  
 413 the asymptomatic spreaders. An aggressive test-and-isolate approach could curtail the  
 414 burden of COVID-19, unlike other tactics like reporting contacts, wearing masks, and

415 maintaining social distance. Otherwise, this basic reproduction number could increase  
 416 upto 5.7 within 20 days. Again, we want to express that such estimation is subject to  
 417 differ due to various changing factors such as mitigation policies and people awareness  
 in the near term.

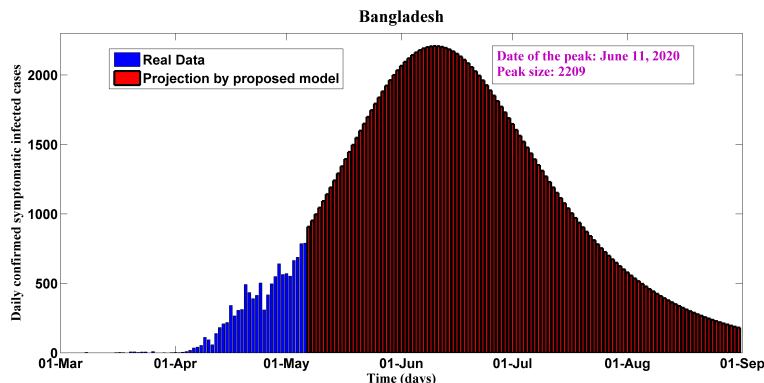

(a) The number of daily detected symptomatic infectious cases measured and projected for Bangladesh from early March to late August, 2020

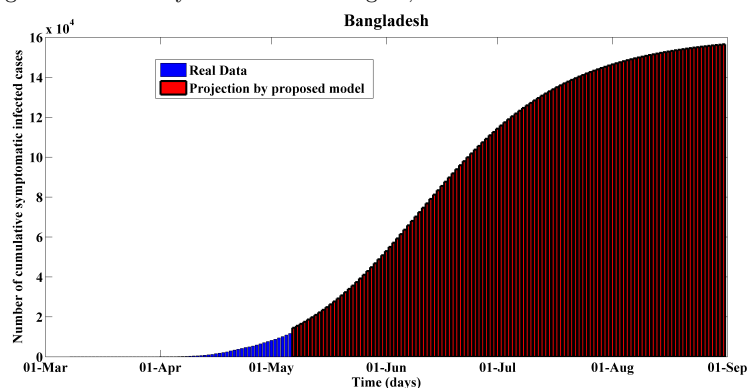

(b) The number of cumulative detected symptomatic infectious cases measured and projected for Bangladesh from early March to late August, 2020

Figure 11: Predictions of the proposed  $SEI_D I_U QHRD$  model for Bangladesh from early March to late August, 2020

418

## 419 6. Global Sensitivity Analysis

420 PRCC analysis which is a global sensitivity analysis method that calculates the  
 421 partial rank correlation coefficient for the model inputs (sampled by Latin hypercube  
 422 sampling method) and outputs [Marino et al., \(2008\)](#); [Blower et al., \(1994\)](#); [Nabi et al., \(2020\)](#). The PRCC method assumes a monotonic relationship between the model  
 423 input parameters and the model outputs.  
 424

425 The calculated PRCC values are between -1 and 1 and they are comparable among  
 426 different model inputs. The sign of the PRCC values shows the qualitative relationship  
 427 between the model input and model output. A positive PRCC value implies that  
 428 when the corresponding model input increases, the model output will also increase.  
 429 A negative PRCC value indicates a negative correlation between the model input and  
 430 output. The magnitude of the PRCC sensitivity measures the significance of the model  
 431 input in contributing to the model output.



432 As our proposed epidemic model contains a moderate number of empirical param-  
433 eters, uncertainty analysis can give considerable insights regarding the quantitative re-  
434 lationship between model responses and model input parameters. However, it is really  
435 challenging for complex models to determine the relationship with sufficient accuracy.  
436 Importantly, we have got startling yet realistic results from our sensitivity analysis.  
437 As we can see from Figure 12, we found nearly the same qualitative and significant  
438 quantitative relationship between the number of symptomatic infectious individuals  
439 (one of the crucial model responses) and three parameters which are rate of getting  
440 quarantined of susceptible individuals ( $q$ ), transition rate from exposed to infectious  
441 or quarantined ( $\kappa$ ) which can also be referred as the inverse of the average incuba-  
442 tion period of COVID-19 and recovery rate of undetected asymptomatic (undetected)  
443 infectious carriers for our proposed model.

444 In case of Russia, from Figure 12a recovery rate of undetected asymptomatic car-  
445 riers ( $\phi_U$ ) is the most negatively influential parameter when the number of detected  
446 infectious individuals is our selected model response. The PRCC index is found to  
447 be  $-0.585$ . In addition, rate of entering into home-quarantine or self-quarantine of  
448 susceptible individuals ( $q$ ) and the fraction of wrongly quarantined people who be-  
449 come susceptible after certain latent period ( $r_1$ ) are the other two influential empirical  
450 features with PRCC indexes are  $-0.5672$  and  $0.567$  respectively.

451 In case of Brazil, rate of getting home-quarantined or self-quarantined of suscep-  
452 tible individuals ( $q$ ), the fraction of quarantined people who become susceptible due  
453 to avoiding home-quarantine ( $r_1$ ), and the inverse of the COVID-19 mean latent pe-  
454 riod are the most influential parameter on the symptomatic infectious population size  
455 ( $I_D(t)$ ). The corresponding PRCC indices are  $-0.62$ ,  $0.53$  and  $-0.499$ . The figure 12b  
456 qualitatively elucidates that a high quarantine rate of the susceptible individuals can  
457 curtail the number of symptomatic infected individuals. In broader view, high efficacy  
458 of home or self-quarantine and a lower unlockdown rate could flatten the  $I_D(t)$  curve  
459 in Brazil.

460 In case of the India, rate of getting home-quarantined or self-quarantined of sus-  
461 ceptible individuals ( $q$ ) and the inverse of the COVID-19 incubation period are the  
462 most influential parameter on the symptomatic infectious population size ( $I_D(t)$ ) and  
463 the corresponding PRCC indexes are  $-0.64$  and  $-0.62$ . Both the parameters are neg-  
464 atively sensitive to the size of detected infected individuals which is illustrated in the  
465 figure 12c. This elucidates that a higher quarantine rate of the susceptible individuals  
466 can reduce the number of symptomatic infected individuals. Therefore, it is obvious  
467 that early unlockdown in India could worsen the outbreak situation in the blink of an  
468 eye.

469 In case of the UK, rate of getting home-quarantined or self-quarantined of suscep-  
470 tible individuals ( $q$ ) and the inverse of the COVID-19 incubation period are the most  
471 influential parameter on the symptomatic infectious population size ( $I_D(t)$ ) and the  
472 corresponding PRCC indices are  $-0.58$  and  $-0.499$ . Both the parameters are neg-  
473 atively sensitive to the size of detected infected individuals which is illustrated in the  
474 figure 12d. This elucidates that a higher quarantine rate of the susceptible individuals  
475 can curtail the number of symptomatic infected individuals. Nevertheless, early easing  
476 lockdown measures could bring a second wave of infection in the UK in no time.

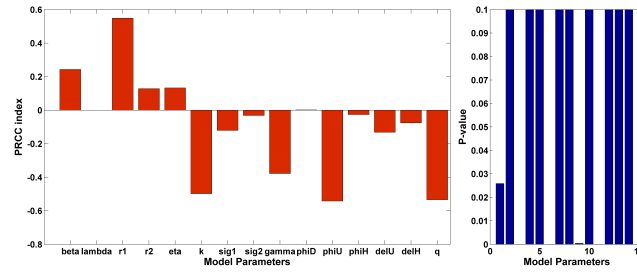

(a) Sensitivity analysis for Russia

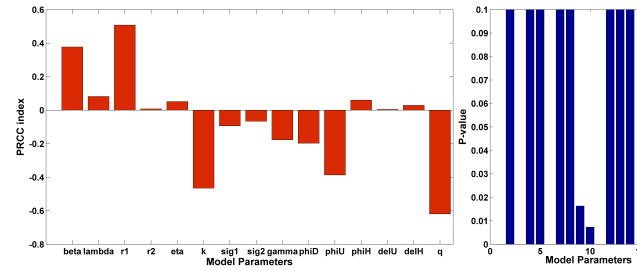

(b) Sensitivity analysis for Brazil

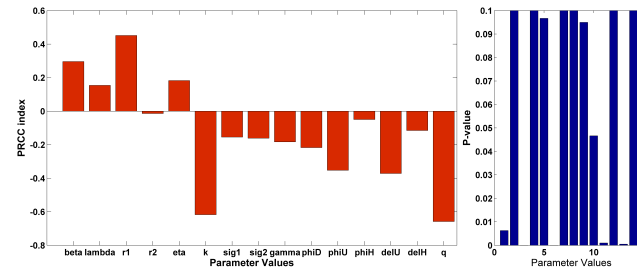

(c) Sensitivity analysis for India

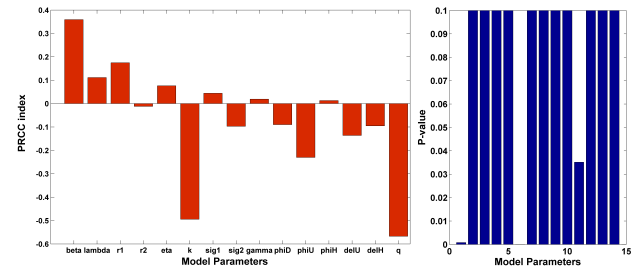

(d) Sensitivity analysis for the UK

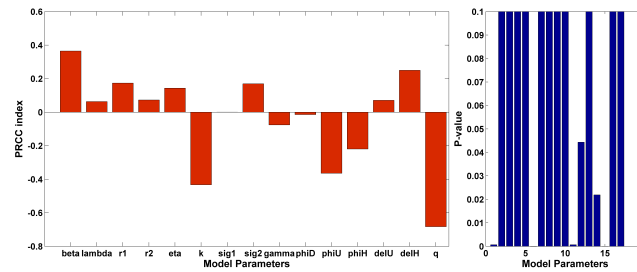

(e) Sensitivity analysis for Bangladesh

Figure 12: Sensitivity of the symptomatic infected cases while changing parameters in the proposed  $SEI_D I_U QRHD$  model as indicated by the PRCC index for five different countries

477 For Bangladesh, it has been found in our analysis, home-quarantine rate is the most  
478 negatively sensitive parameter on the size of symptomatic infectious individuals and the  
479 corresponding PRCC index is  $-0.68$  which is the highest among our five studied cases.  
480 The result in Figure 12e elucidates that if the people in Bangladesh start breaking  
481 social distancing restrictions extensively, then it would be difficult to control the disease  
482 outbreak there. As of May 11, when Bangladesh is seeing continuous spikes in COVID-  
483 19 infections every day, the government has announced an easing of movement for all  
484 on a limited scale with a view to reviving the country's economy. Moreover, the length  
485 of the inverse of the latent period is the another negatively sensitive parameter with  
486 PRCC index lying at  $-0.43$ .

## 487 7. Concluding Remarks

488 We have proposed a methodology for the estimation of the key epidemiological  
489 parameters as well as forecasting of the spread of the COVID-19 epidemic in Russia,  
490 Brazil, India, Bangladesh and the UK while considering publicly available data from  
491 early January 2020 to early May 2020 with the introduction of an real-time differential  
492  $SEI_D I_U QHRD$  epidemic model which can give more accurate and robust short-term  
493 predictions. Nominal quantities for the parameters are selected from the related liter-  
494 ature concerning the COVID-19 infection. The calibration process is done through the  
495 solution of an inverse problem with the aid of a Trust-Region-Reflective method, used  
496 to pick the best parameter values that would fit the model response for the number of  
497 new infectious cases per week into the disease's empirical data. Results within realistic  
498 values for the parameters are presented, stating reasonable descriptions with the curve  
499 shape similar to the outbreak.

500 Numerical results on the recent COVID-19 data from Russia, Brazil, India, Bangladesh  
501 and the UK have been analyzed. Based on the projection as of May 11, 2020, Russia  
502 will reach the peak in terms of daily infected cases and death cases around end of May.  
503 Brazil and India will reach the peak in terms of daily infected cases and death cases  
504 around beginning of June. Based on the projection the United Kingdom may have  
505 a second wave of infection provided that lockdown is lifted. To end the pandemic, it  
506 is mandatory to actively seek out potential spreaders, particularly the asymptomatic  
507 spreaders which requires massive scale testing. Such a level of testing would effectively  
508 bring the  $R_0$  below 1 in the above mentioned countries which will eventually cause the  
509 pandemic to fade out.

510 **References**

- 511 Shen, M., Peng, Z., Xiao, Y., & Zhang, L. (2020). Modelling the epidemic trend of the  
512 2019 novel coronavirus outbreak in China. *bioRxiv*.
- 513 Read, J. M., Bridgen, J. R., Cummings, D. A., Ho, A., & Jewell, C. P. (2020). Novel  
514 coronavirus 2019-nCoV: early estimation of epidemiological parameters and epidemic  
515 predictions. *MedRxiv*.
- 516 Li, R., Pei, S., Chen, B., Song, Y., Zhang, T., Yang, W., & Shaman, J. (2020). Substan-  
517 tial undocumented infection facilitates the rapid dissemination of novel coronavirus  
518 (SARS-CoV2), *Science*, 368(6490), 489-493.
- 519 Ferguson, N., Laydon, D., Nedjati Gilani, G., Imai, N., Ainslie, K., Baguelin, M., &  
520 Dighe, A. (2020). Report 9: Impact of non-pharmaceutical interventions (NPIs) to  
521 reduce COVID19 mortality and healthcare demand.
- 522 Lauer, S. A., Grantz, K. H., Bi, Q., Jones, F. K., Zheng, Q., Meredith, H. R., &  
523 Lessler, J. (2020). The incubation period of coronavirus disease 2019 (COVID-19)  
524 from publicly reported confirmed cases: estimation and application. *Annals of inter-  
525 nal medicine*, 172(9), 577-582.
- 526 Tang, B., Bragazzi, N. L., Li, Q., Tang, S., Xiao, Y., & Wu, J. (2020). An updated  
527 estimation of the risk of transmission of the novel coronavirus (2019-nCov). *Infectious  
528 Disease Modelling*, 5, 248–255.
- 529 Zhou, F., Yu, T., Du, R., Fan, G., Liu, Y., Liu, Z., & Guan, L. (2020). Clinical course  
530 and risk factors for mortality of adult inpatients with COVID-19 in Wuhan, China:  
531 a retrospective cohort study. *The Lancet*, 395 (10229), 1054-1062.
- 532 Moriarty, L. F., Plucinski, M., M., Marston, & B. J. et al. (2020). Public Health  
533 Responses to COVID-19 Outbreaks on Cruise Ships-Worldwide, February-March  
534 2020. *Morbidity and Mortality Weekly Report*, 69, 347-352.
- 535 Wu, J. T., Leung, K., & Leung, G. M. (2020). Nowcasting and forecasting the potential  
536 domestic and international spread of the 2019-nCoV outbreak originating in Wuhan,  
537 China: a modelling study. *The Lancet*, 395(10225), 689-697.
- 538 Calafiore, G. C., Novara, C., & Possieri, C. (2020). A Modified SIR Model for the  
539 COVID-19 Contagion in Italy. *arXiv preprint arXiv: 2003.14391*.
- 540 Kucharski, A. J., Russell, T. W., Diamond, C., Liu, Y., Edmunds, J., Funk, S., &  
541 Davies, N. (2020). Early dynamics of transmission and control of COVID-19: a  
542 mathematical modelling study. *The Lancet Infectious Diseases*, 20(5), 553-558.
- 543 Simha, A., Prasad, R. V., & Narayana, S. (2020). A simple Stochastic SIR model for  
544 COVID 19 Infection Dynamics for Karnataka: Learning from Europe. *arXiv preprint  
545 arXiv:2003.11920*.

- 546 Anastassopoulou, C., Russo, L., Tsakris, A., & Siettos, C. (2020). Data-Based Analysis,  
547 Modelling and Forecasting of the novel Coronavirus (2019-nCoV) outbreak. *PLOS*  
548 *ONE*, 15(3), e0230405.
- 549 Nesteruk, I. (2020). Statistics based predictions of coronavirus 2019-nCoV spreading  
550 in mainland China. MedRxiv.
- 551 Chang, S. L., Harding, N., Zachreson, C., Cliff, O. M., & Prokopenko, M. (2020).  
552 Modelling transmission and control of the COVID-19 pandemic in Australia. arXiv  
553 preprint arXiv:2003.10218.
- 554 Wilder, B., Charpignon, M., Killian, J. A., Ou, H. C., Mate, A., Jabbari, S., & Ma-  
555 jumder, M. S. (2020). The Role of Age Distribution and Family Structure on COVID-  
556 19 Dynamics: A Preliminary Modeling Assessment for Hubei and Lombardy. Avail-  
557 able at SSRN 3564800.
- 558 Ruiz Estrada, M. A., & Koutrouas, E. (2020). The Networks Infection Contagious Dis-  
559 eases Positioning System (NICDP-System): The Case of Wuhan-COVID-19. Avail-  
560 able at SSRN 3548413.
- 561 Center for Systems Science and Engineering at Johns Hopkins University. (2020).  
562 COVID-19. Github Repository. <https://github.com/CSSEGISandData/COVID-19>.  
563 Last accessed May 08, 2020.
- 564 Verity, R., Okell, L. C., Dorigatti, I., Winskill, P., Whittaker, C., Imai, N., & Dighe, A.  
565 (2020). Estimates of the severity of coronavirus disease 2019: a model-based analysis.  
566 *The Lancet Infectious Diseases*.
- 567 Diego Caccavo, Chinese and Italian COVID-19 outbreaks can be correctly described  
568 by a modified SIRD model, MedRxiv.
- 569 Peter Turchin. Analyzing covid-19 data with sird models, (2020). [https://github.com/pturchin/CSH-Covid-19-Project/blob/master/Turchin\\_2020\\_](https://github.com/pturchin/CSH-Covid-19-Project/blob/master/Turchin_2020_Covid19.pdf)  
570 [Covid19.pdf](https://github.com/pturchin/CSH-Covid-19-Project/blob/master/Turchin_2020_Covid19.pdf)  
571
- 572 Hethcote, H. W., (2000). The Mathematics of Infectious Diseases, *SIAM Review*, 42(4),  
573 599–653.
- 574 LaSalle, JP., (1976). The Stability of Dynamical Systems, *SIAM*, Regional Conference  
575 Series in Applied Mathematics.
- 576 Van den Driessche, P., & Watmough, J., (2002). Reproduction numbers and sub-  
577 threshold endemic equilibria for compartmental models of disease transmission,  
578 *Mathematical biosciences*, 180(1-2), 29–48.
- 579 Diekmann, O., Heesterbeek, J. A. P., & Metz, J. A., (1990). On the definition and the  
580 computation of the basic reproduction ratio  $R_0$  in models for infectious diseases in  
581 heterogeneous populations, *Journal of mathematical biology*, 28(4), 365–382.

- 582 Liu, Y., Gayle, A. A., Wilder-Smith, A. , & Rocklov, J., (2020). The reproductive  
583 number of COVID-19 is higher compared to SARS coronavirus. *Journal of Travel*  
584 *Medicine*, 27(2).
- 585 Marino, S., Hogue, I. B., Ray, C. J., and Kirschner, D. E., (2008). A methodology for  
586 performing global uncertainty and sensitivity analysis in systems biology, *Journal of*  
587 *theoretical biology*, 254 (1), 178–196.
- 588 Blower, S. M., Dowlatabadi, H., (1994). Sensitivity and uncertainty analysis of  
589 complex-models of disease transmission – an HIV model, as an example, *Int. Stat.*  
590 *Rev.*, 62(2), 229–243.
- 591 Nabi, K. N. & Podder, C. N., (2020). Sensitivity analysis of chronic hepatitis C  
592 virus infection with immune response and cell proliferation. *International Journal*  
593 *of Biomathematics*, 13(3), 2050017.
- 594 Worldometer, <https://www.worldometers.info/coronavirus>, accessed: 12-05-2020.
- 595 Qianying, L., Shi, Z., Daozhou, G., Yijun, L., Shu, Y., Salihu, S. M., Maggie, H. W.,  
596 Yongli, K., Weiming, W., Lin, Y., Daihai, H., (2020). A conceptual model for the  
597 outbreak of Coronavirus disease 2019 (COVID-19) in Wuhan, China with individual  
598 reaction and governmental action. *International Journal of Infectious Diseases*, 93,  
599 211-216.
- 600 G. Chavent. Nonlinear Least Squares for Inverse Problems: Theoretical Foundations  
601 and Step-by-Step Guide for Applications. Springer, 2010.
- 602 Richard, C. A., Brian, B., Clifford, H. T., Parameter Estimation and Inverse Problems,  
603 Elsevier, second edition, 2012. ISBN 978-0-128-10092-9.
- 604 Yaman, F., Yakhno, V. G., & Potthast, R., 2013. A Survey on Inverse Problems for  
605 Applied Sciences, *Mathematical Problems in Engineering*, Volume 2013, Article ID  
606 976837.
- 607 Coleman, T. F. & Y. Li. An interior, trust region approach for nonlinear minimization  
608 subject to bounds. *SIAM J. Optimization*, 6(2), 418-445.
- 609 Andrew, R. C., Nicholas, I. M. G., and Philippe, L. T., Trust Region Methods. SIAM,  
610 2000.
- 611 Institute of Epidemiology, Disease Control and Research (IEDCR), Bangladesh [https:](https://www.iedcr.gov.bd)  
612 [//www.iedcr.gov.bd](https://www.iedcr.gov.bd), accessed: 11-05-2020.
- 613 Ministry of Health & Family Welfare of Bangladesh, [https://dghs.gov.bd/index.](https://dghs.gov.bd/index.php/en/home/5343-covid-19-update)  
614 [php/en/home/5343-covid-19-update](https://dghs.gov.bd/index.php/en/home/5343-covid-19-update), accessed: 11-05-2020.



# Bangladesh

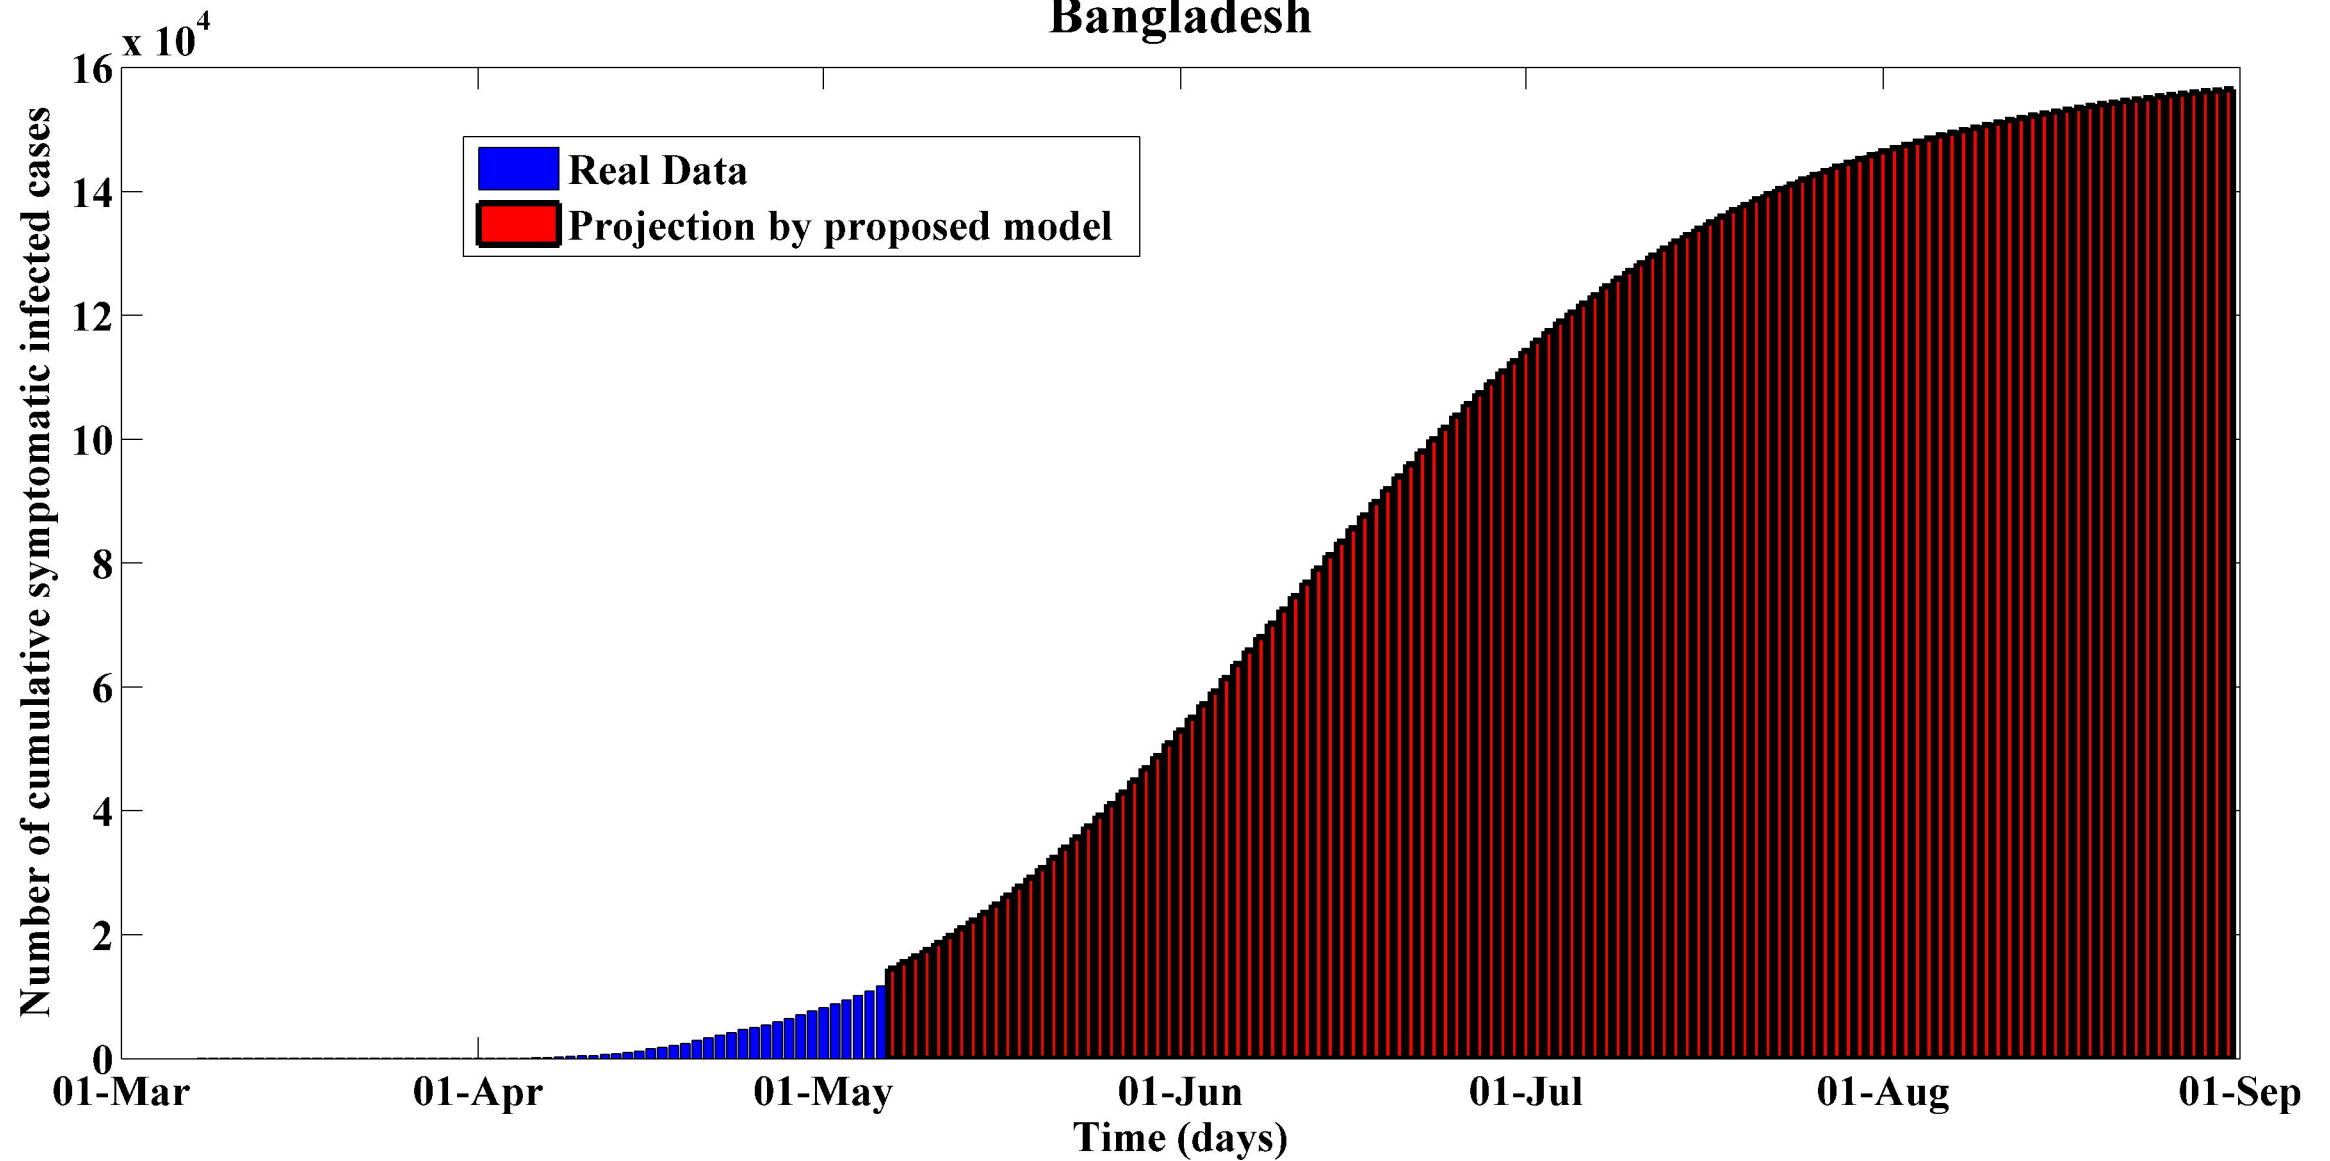

# Bangladesh

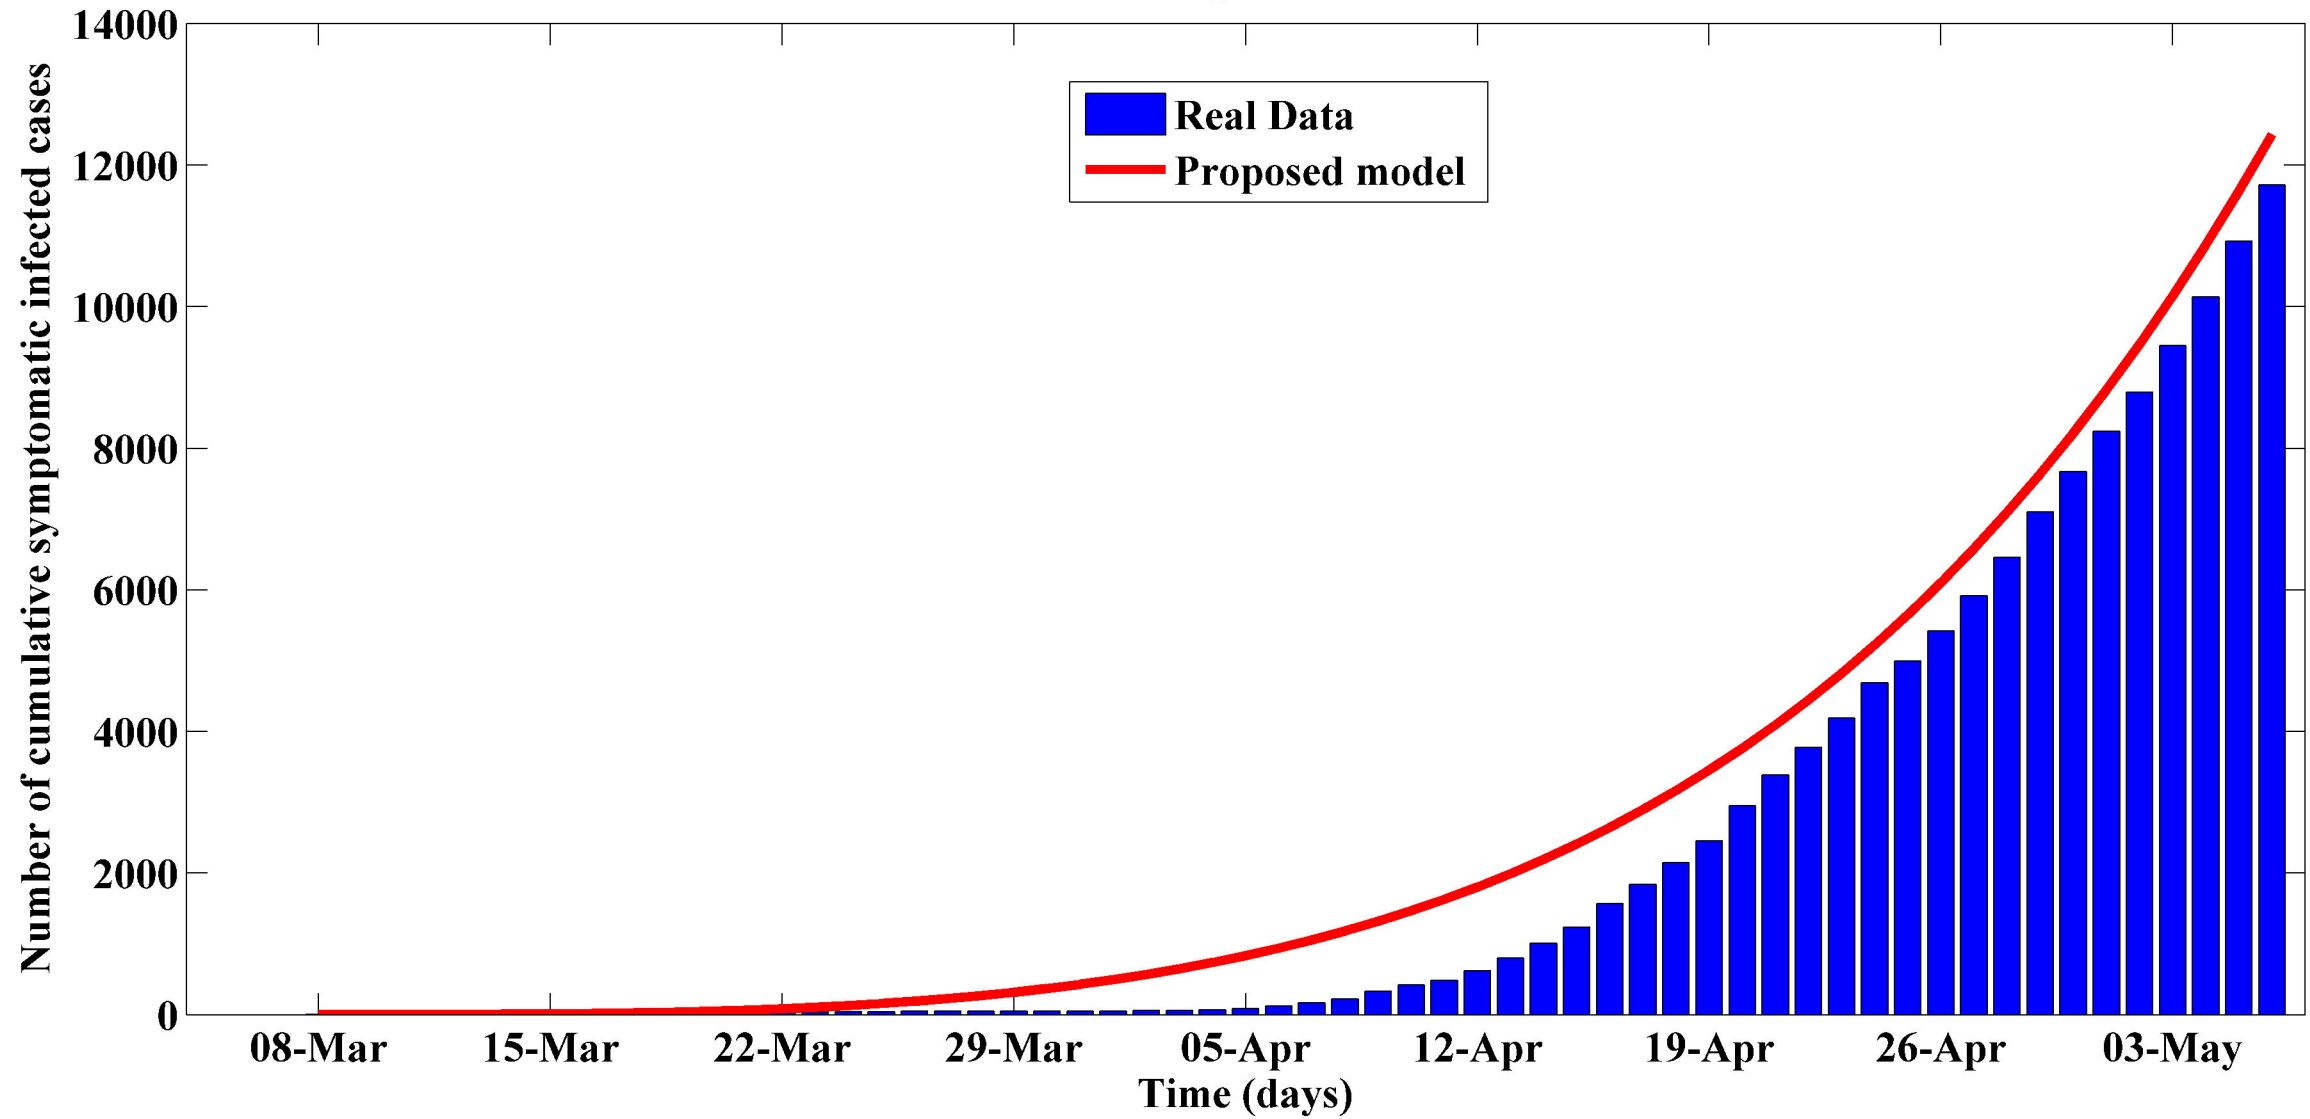

# Bangladesh

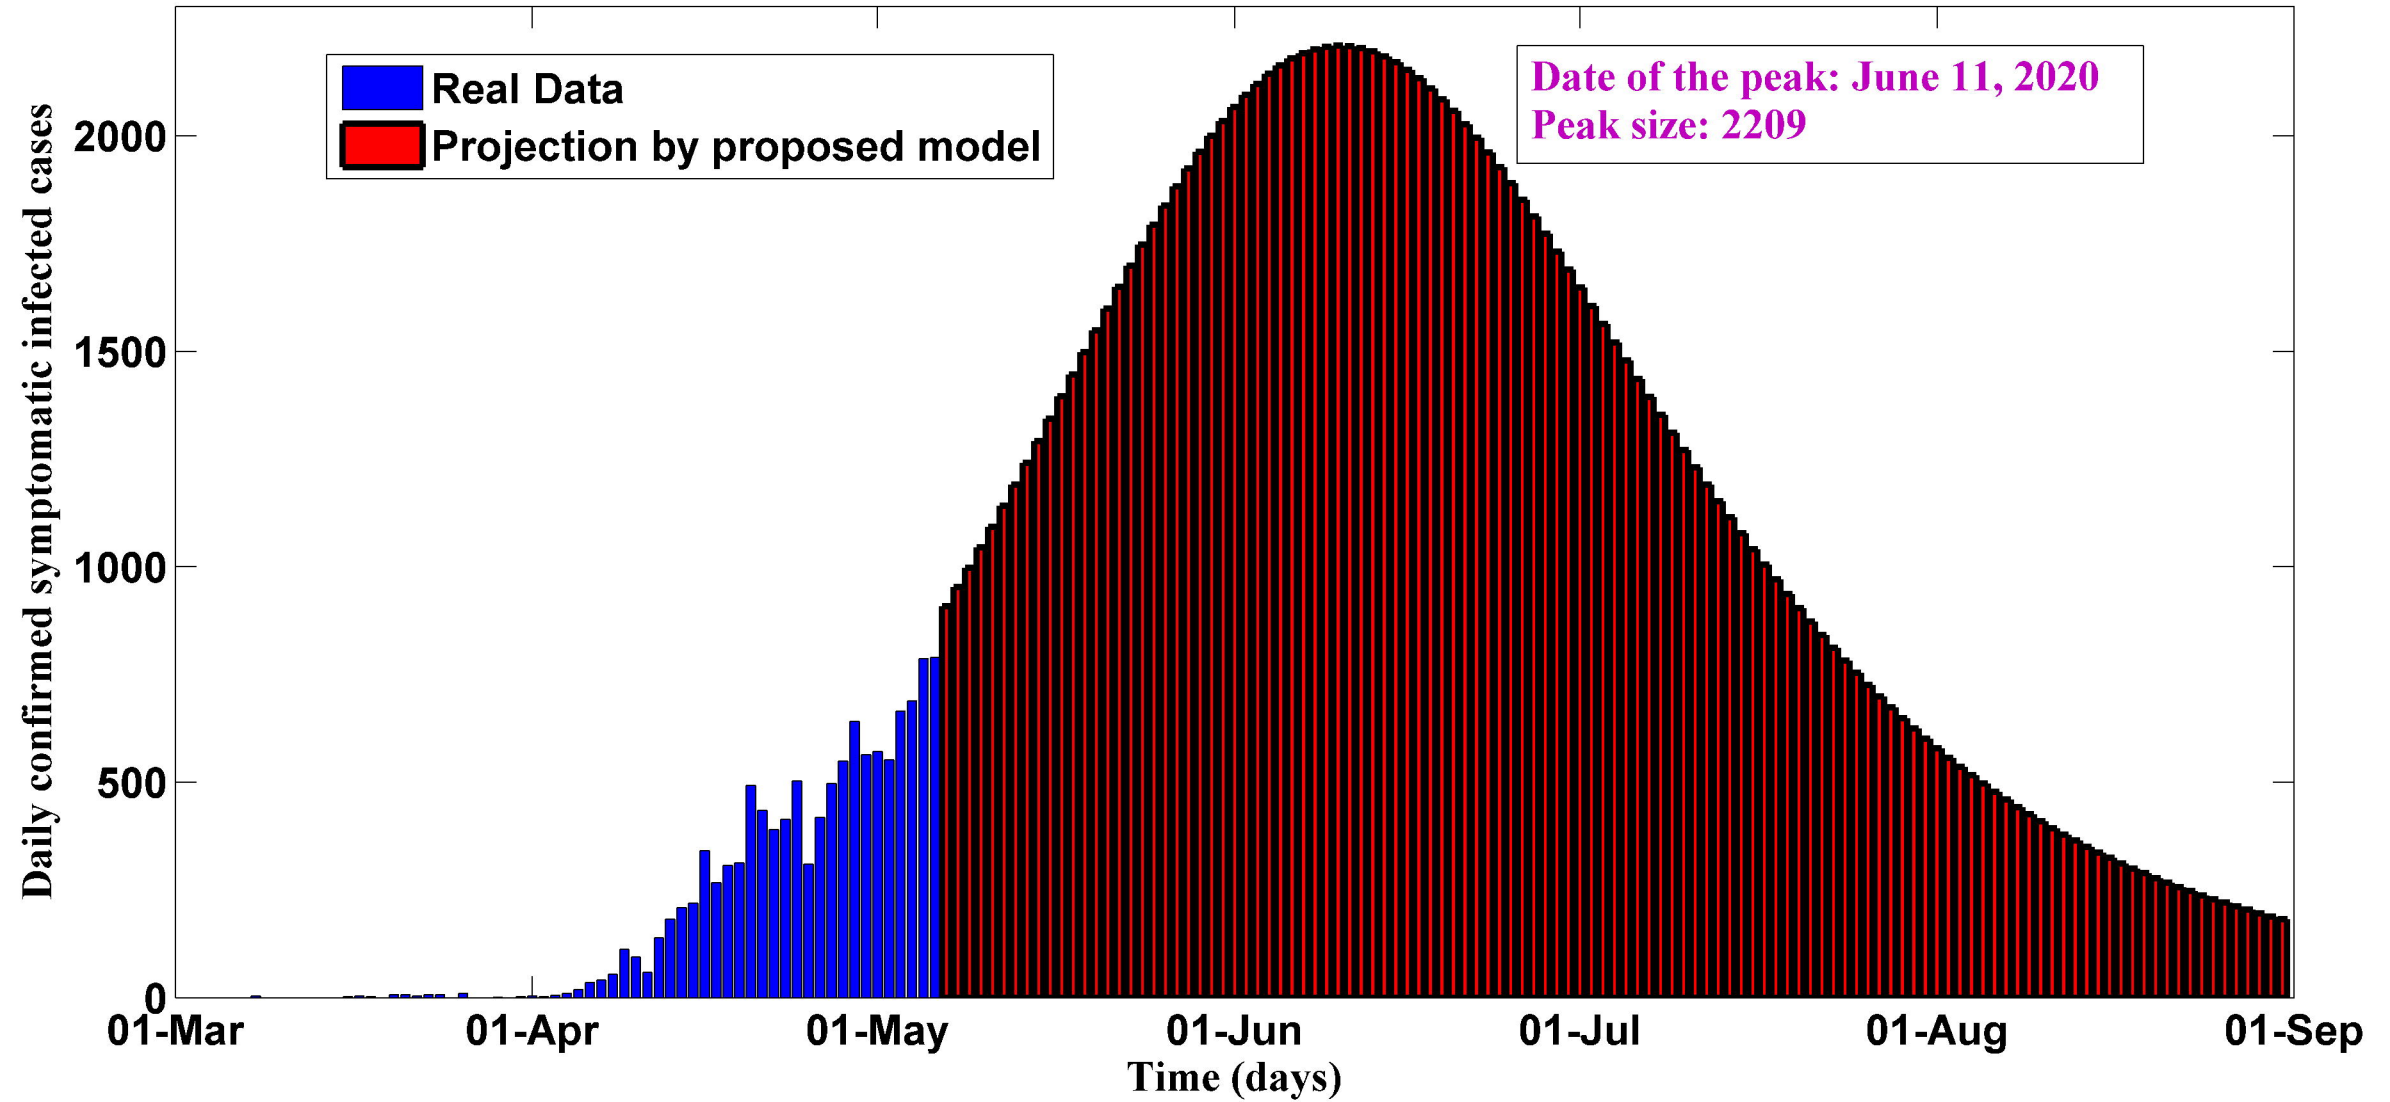

# Bangladesh

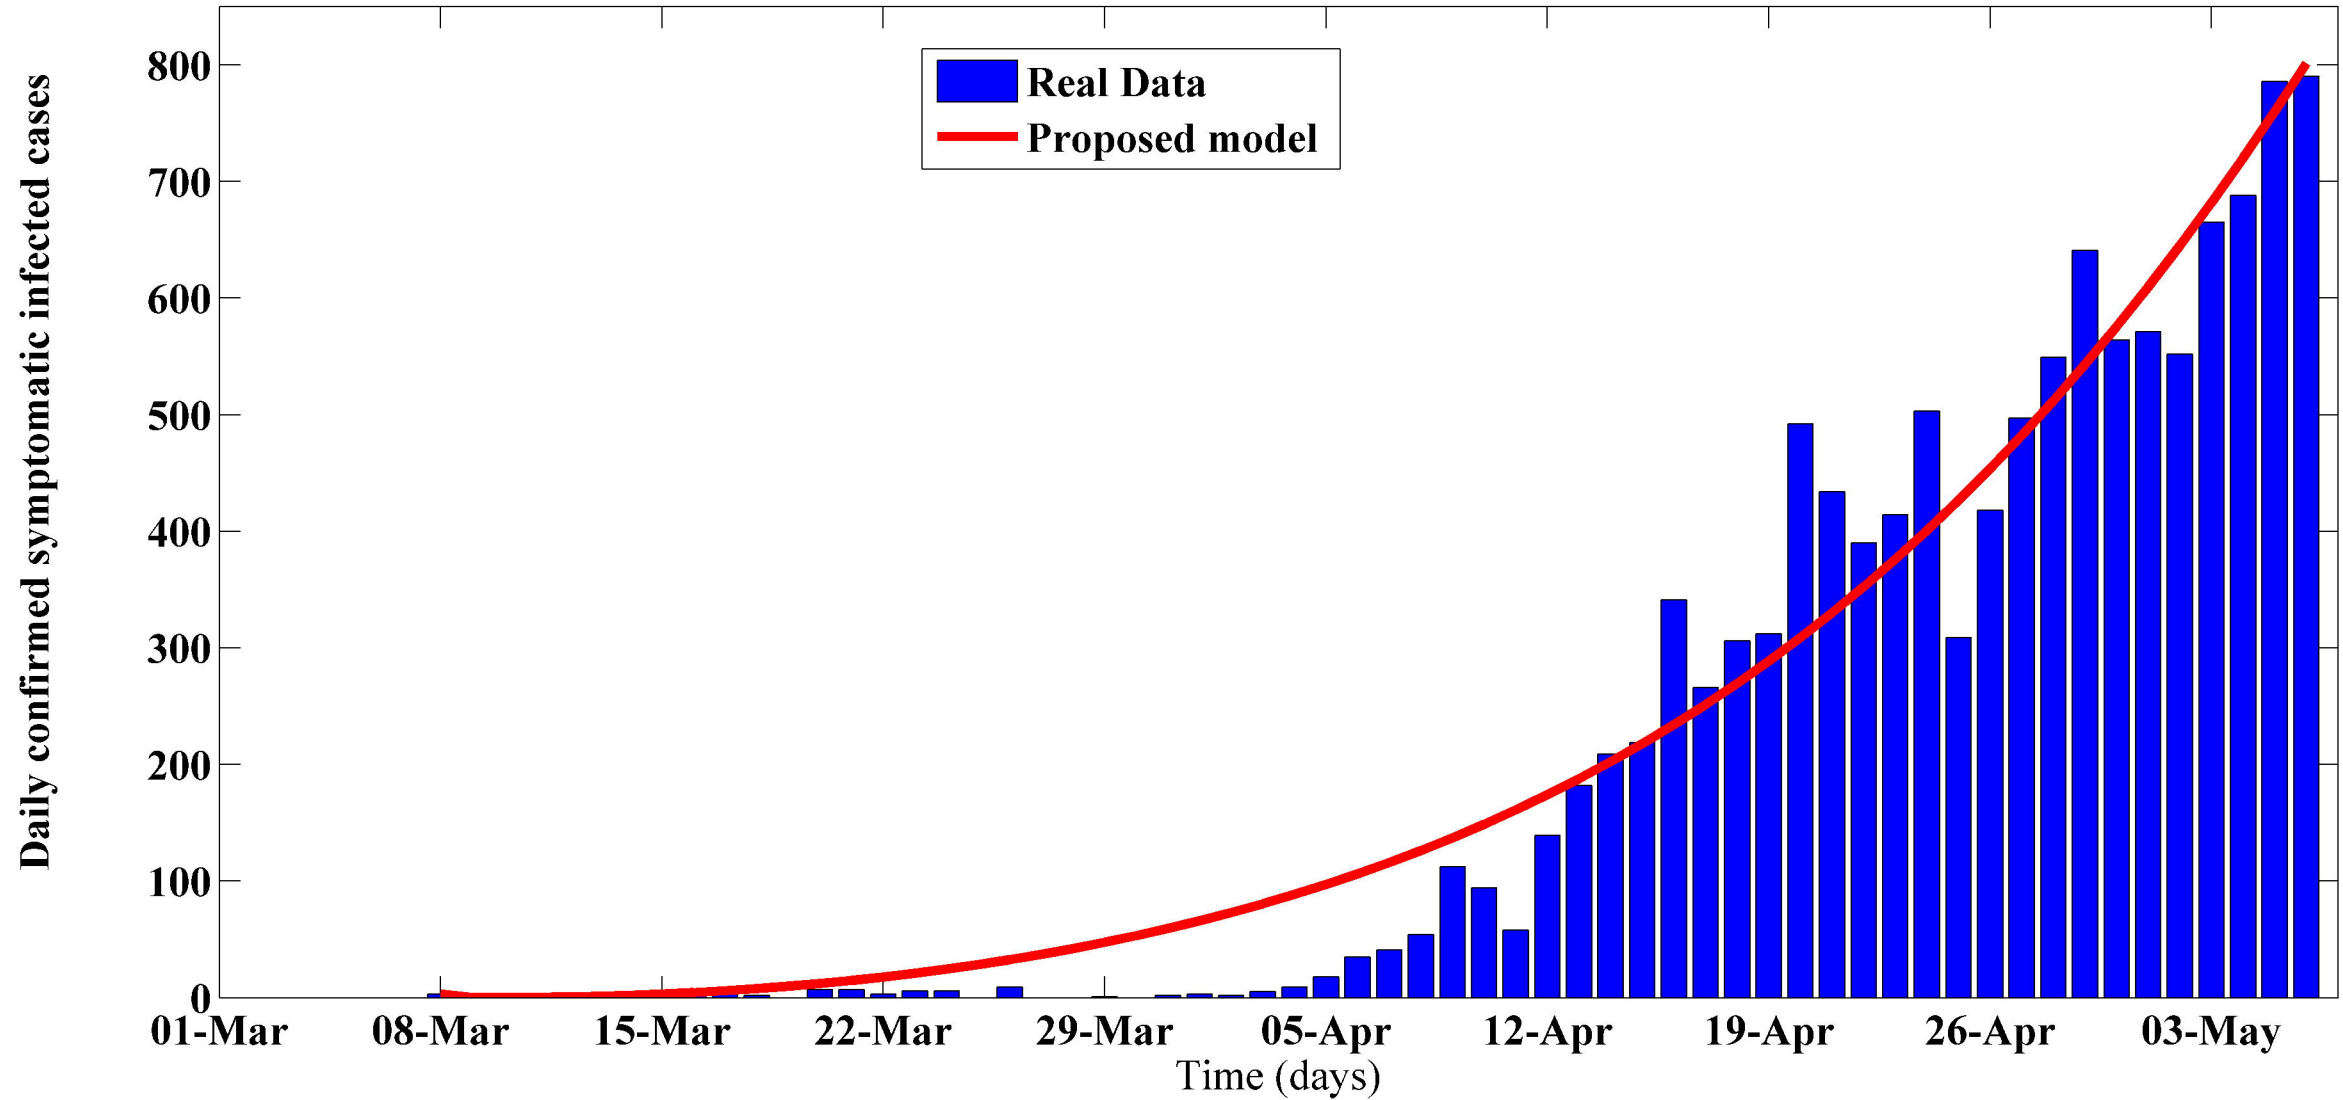

# Brazil

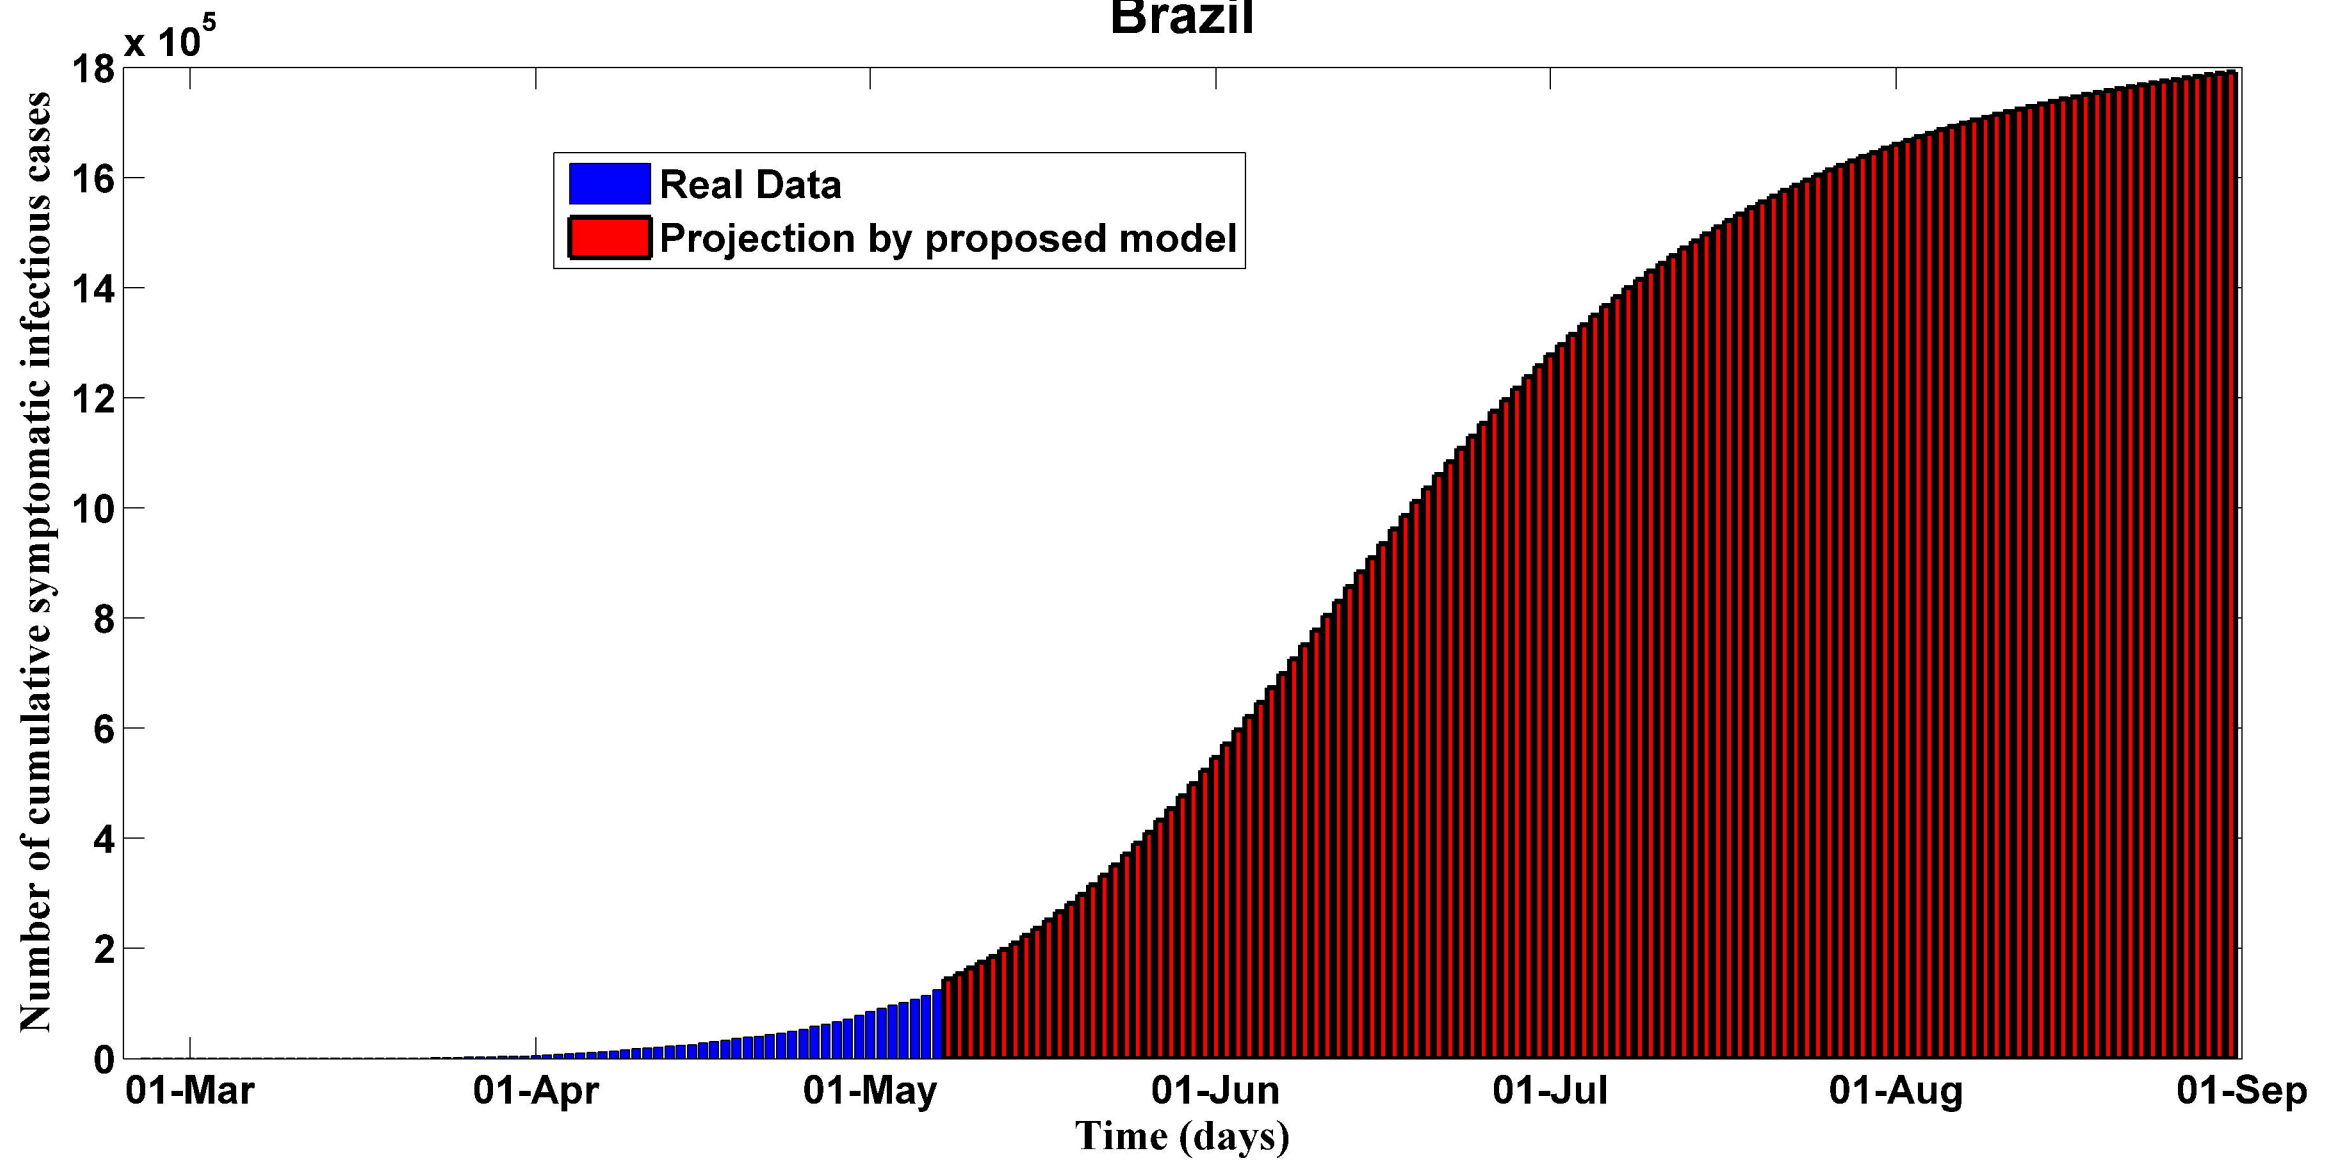

# Brazil

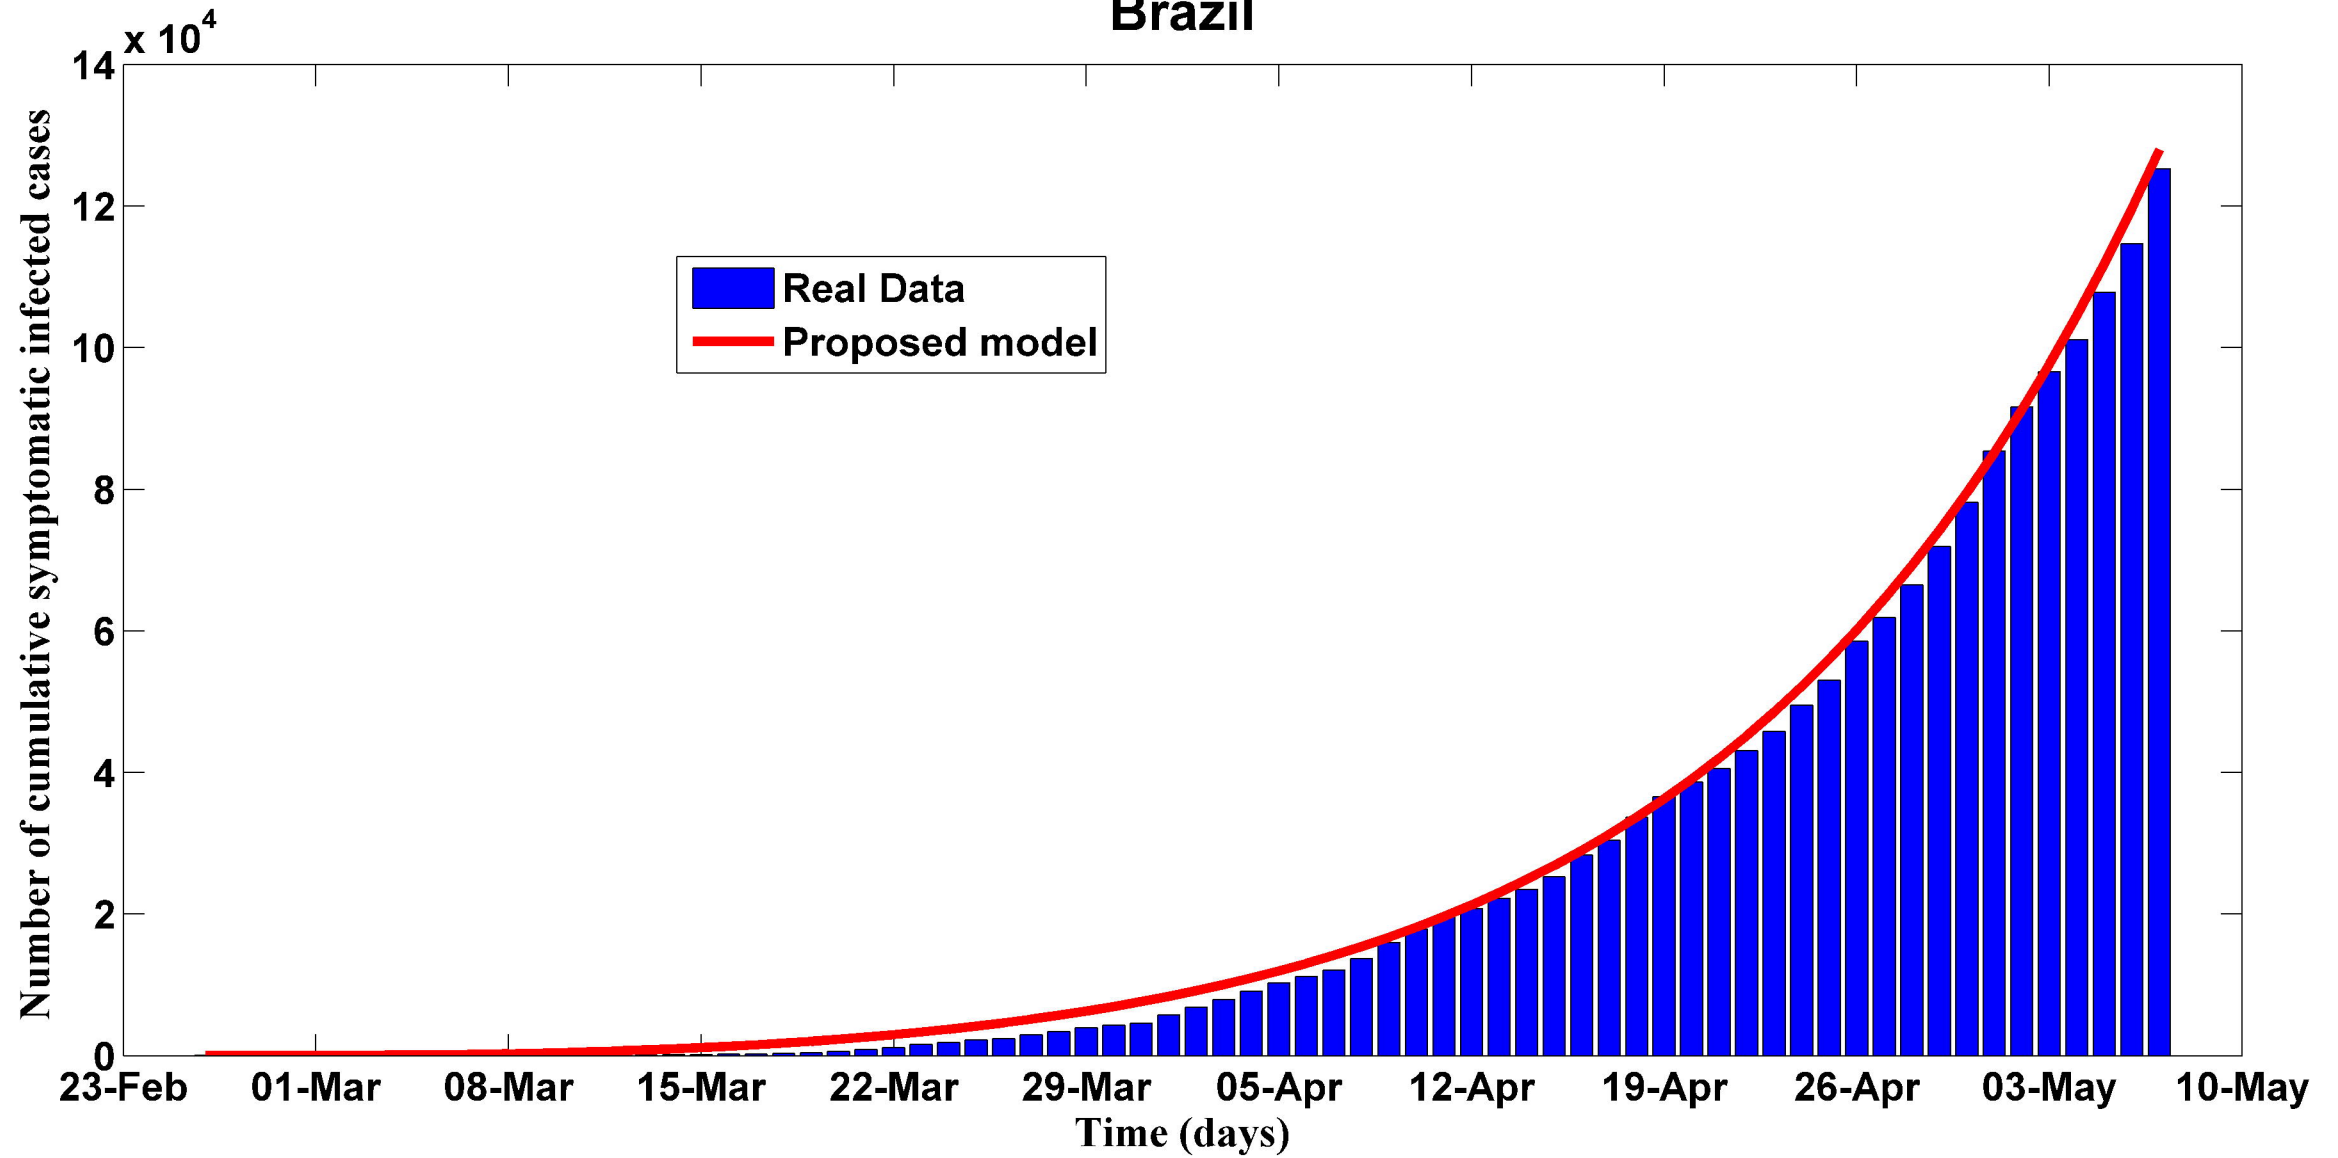

# Brazil

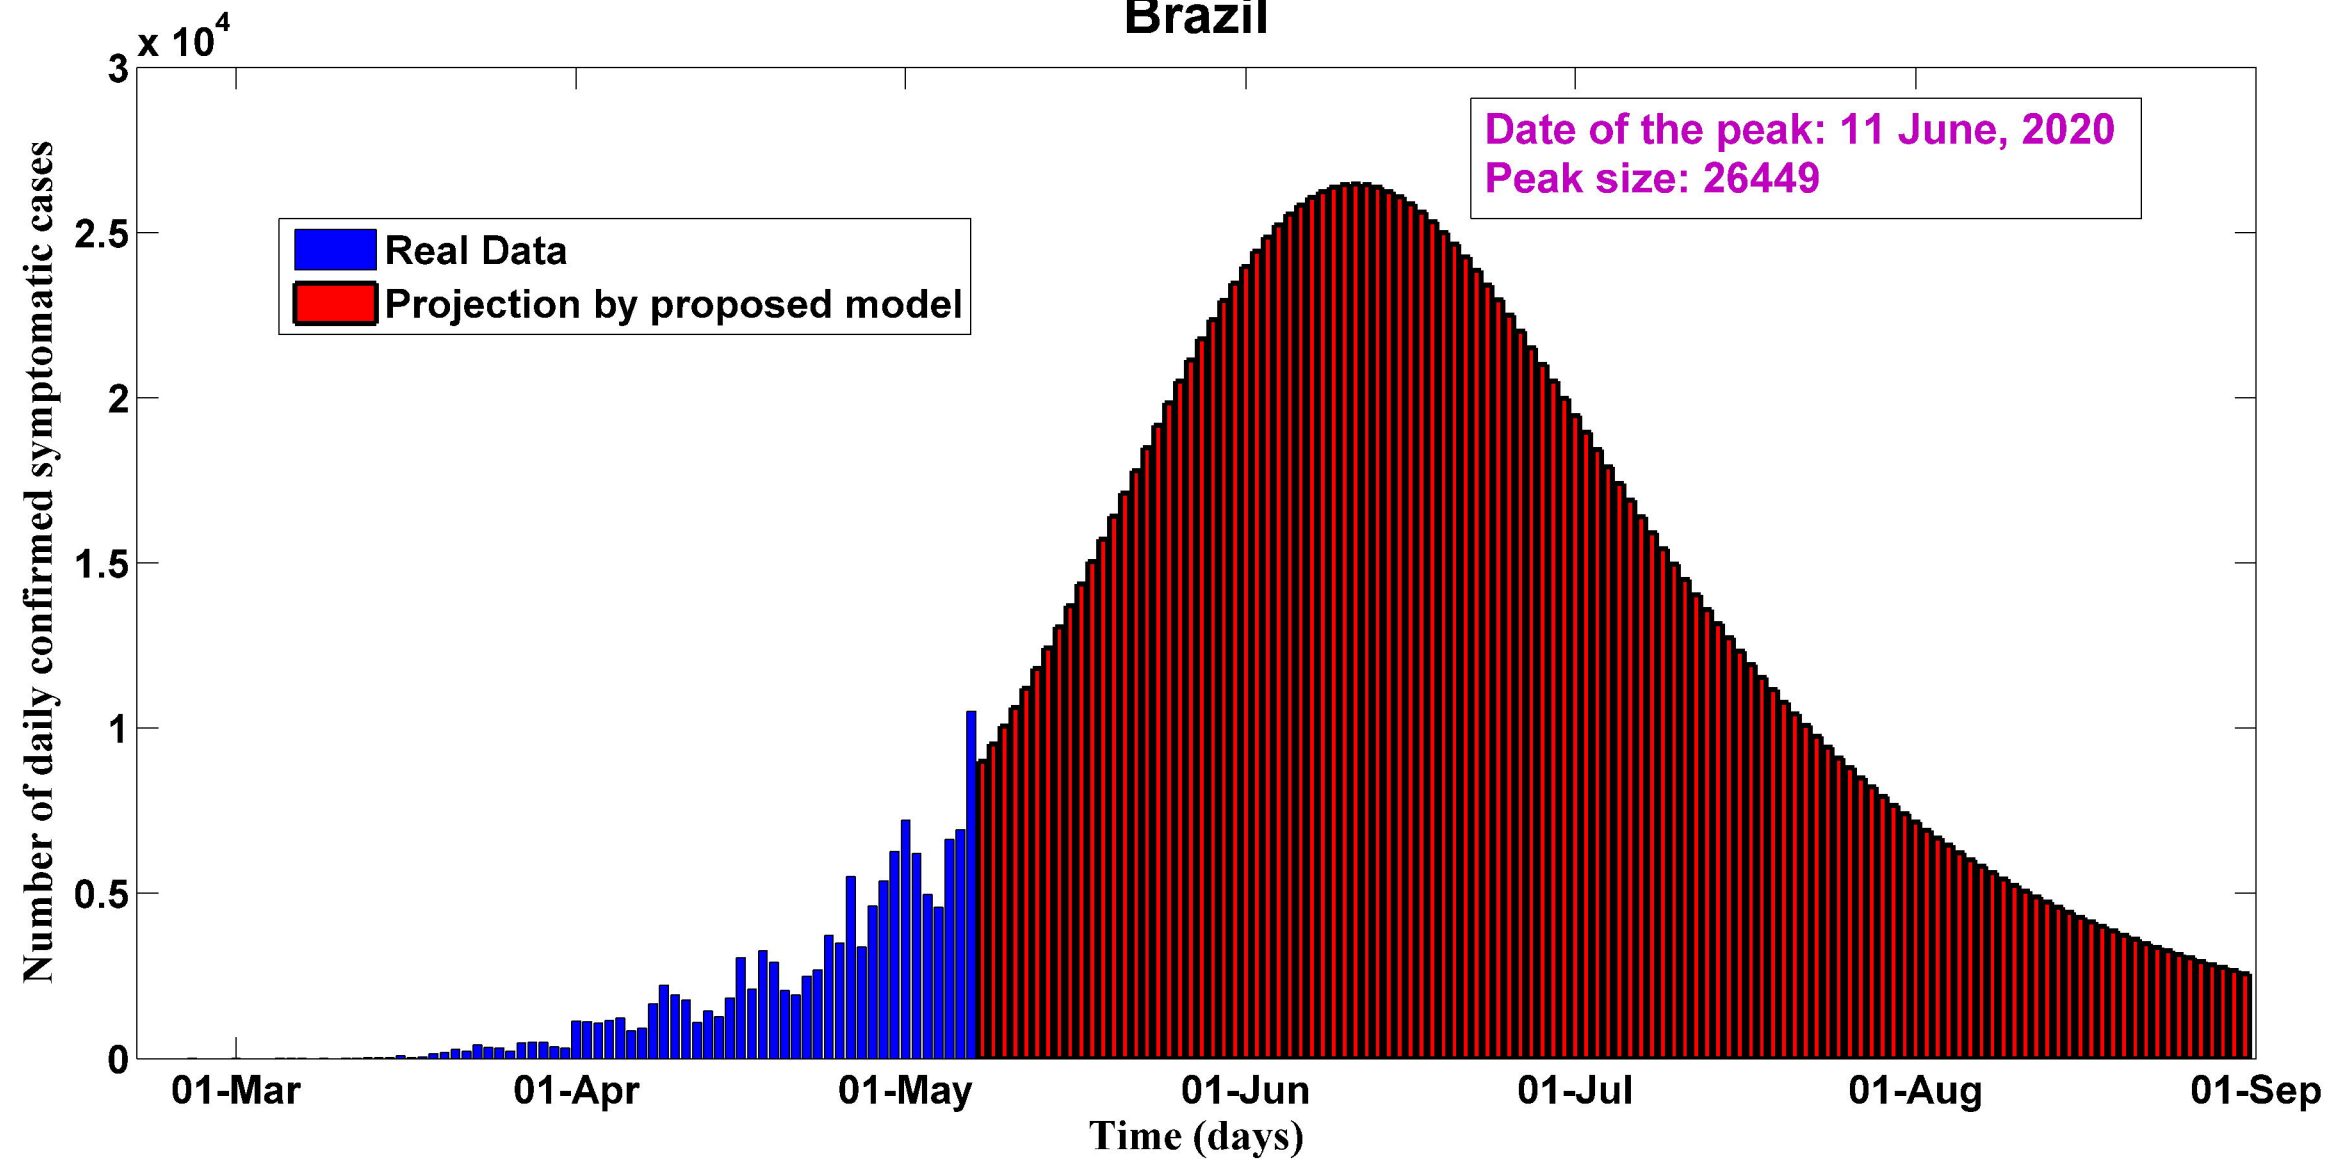



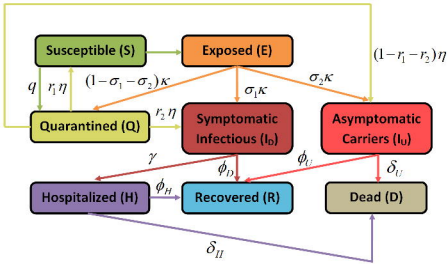

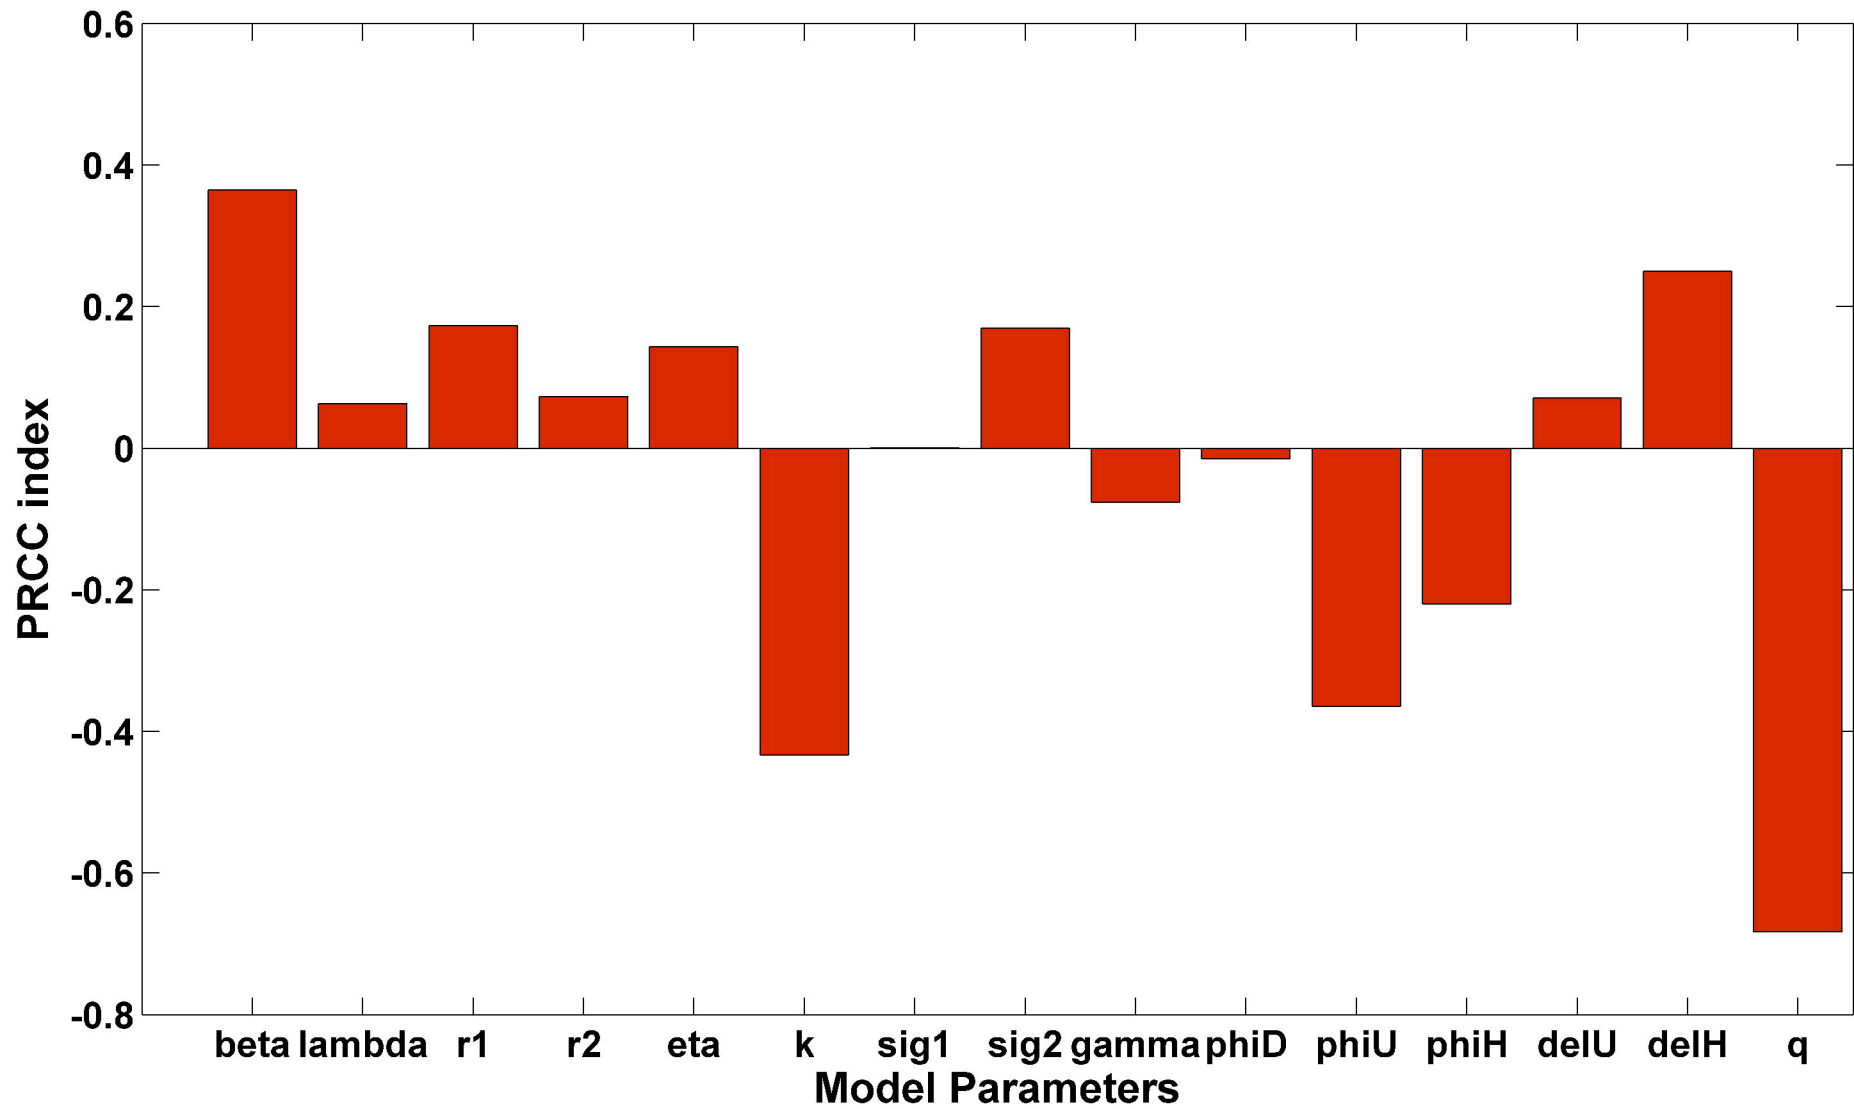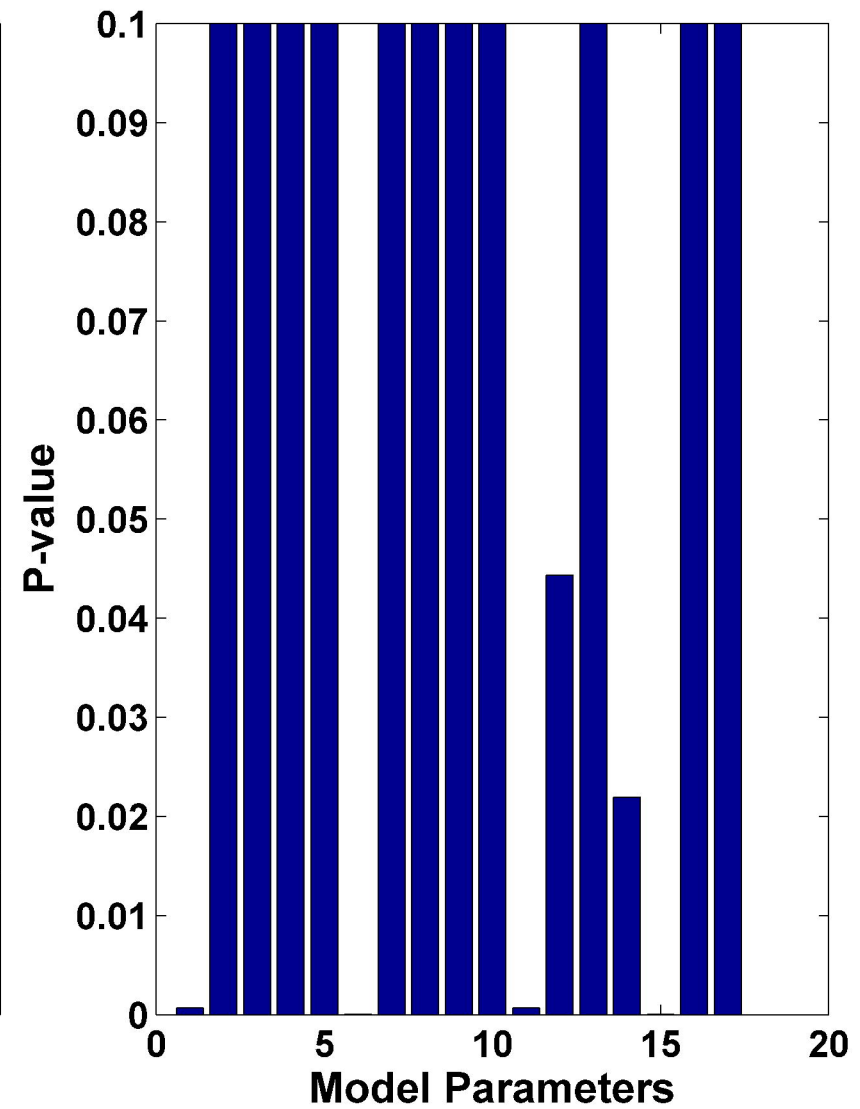

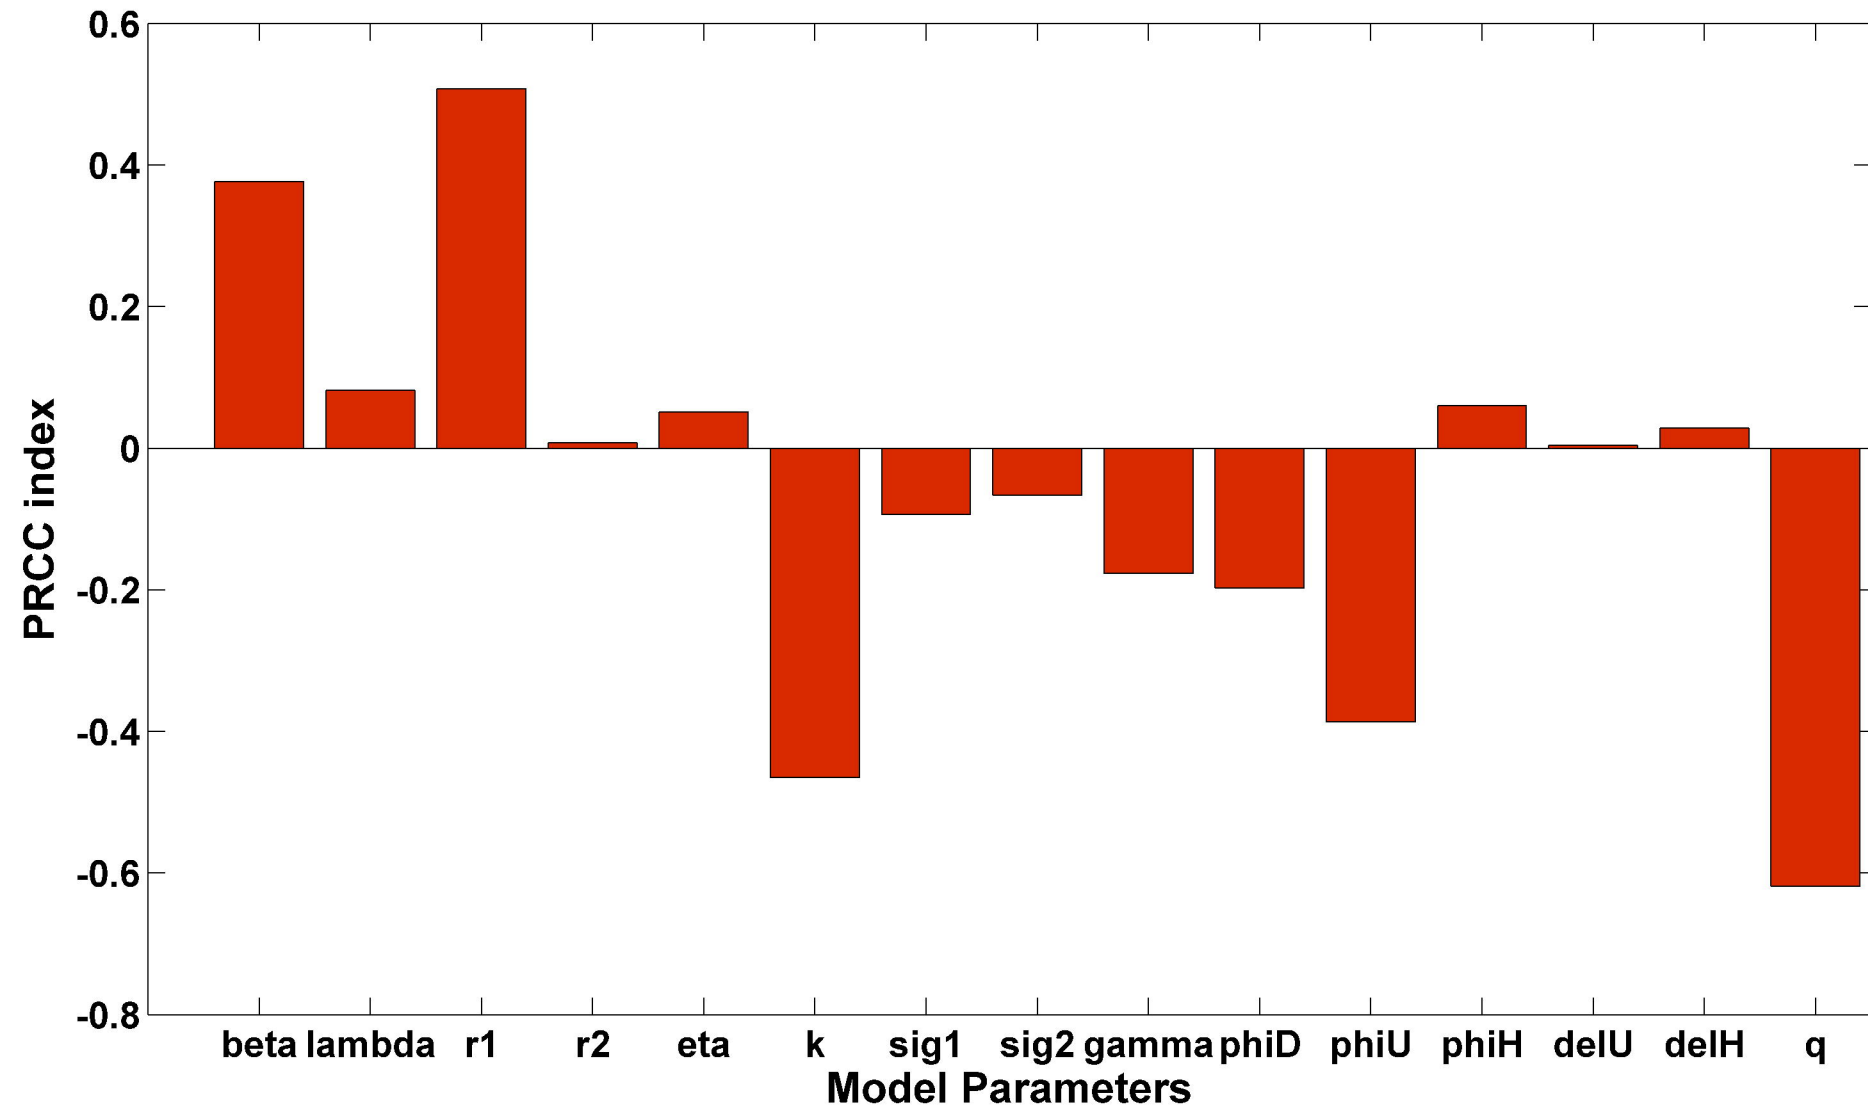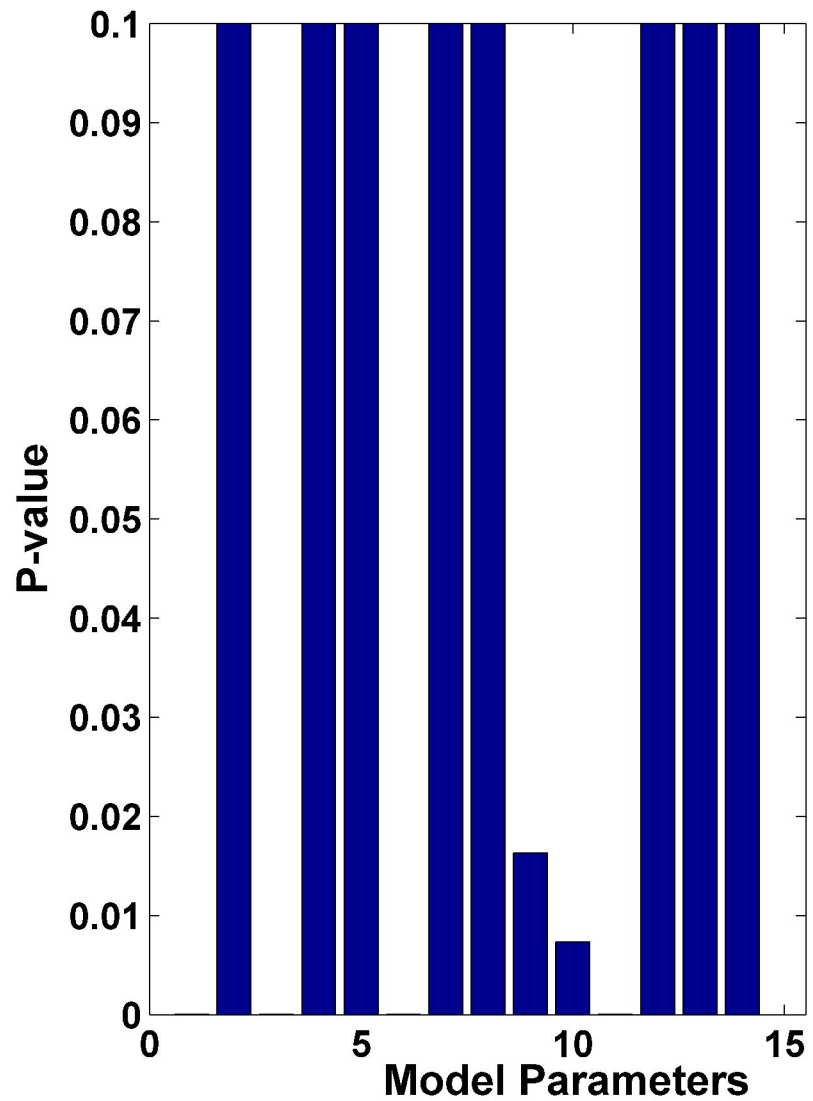

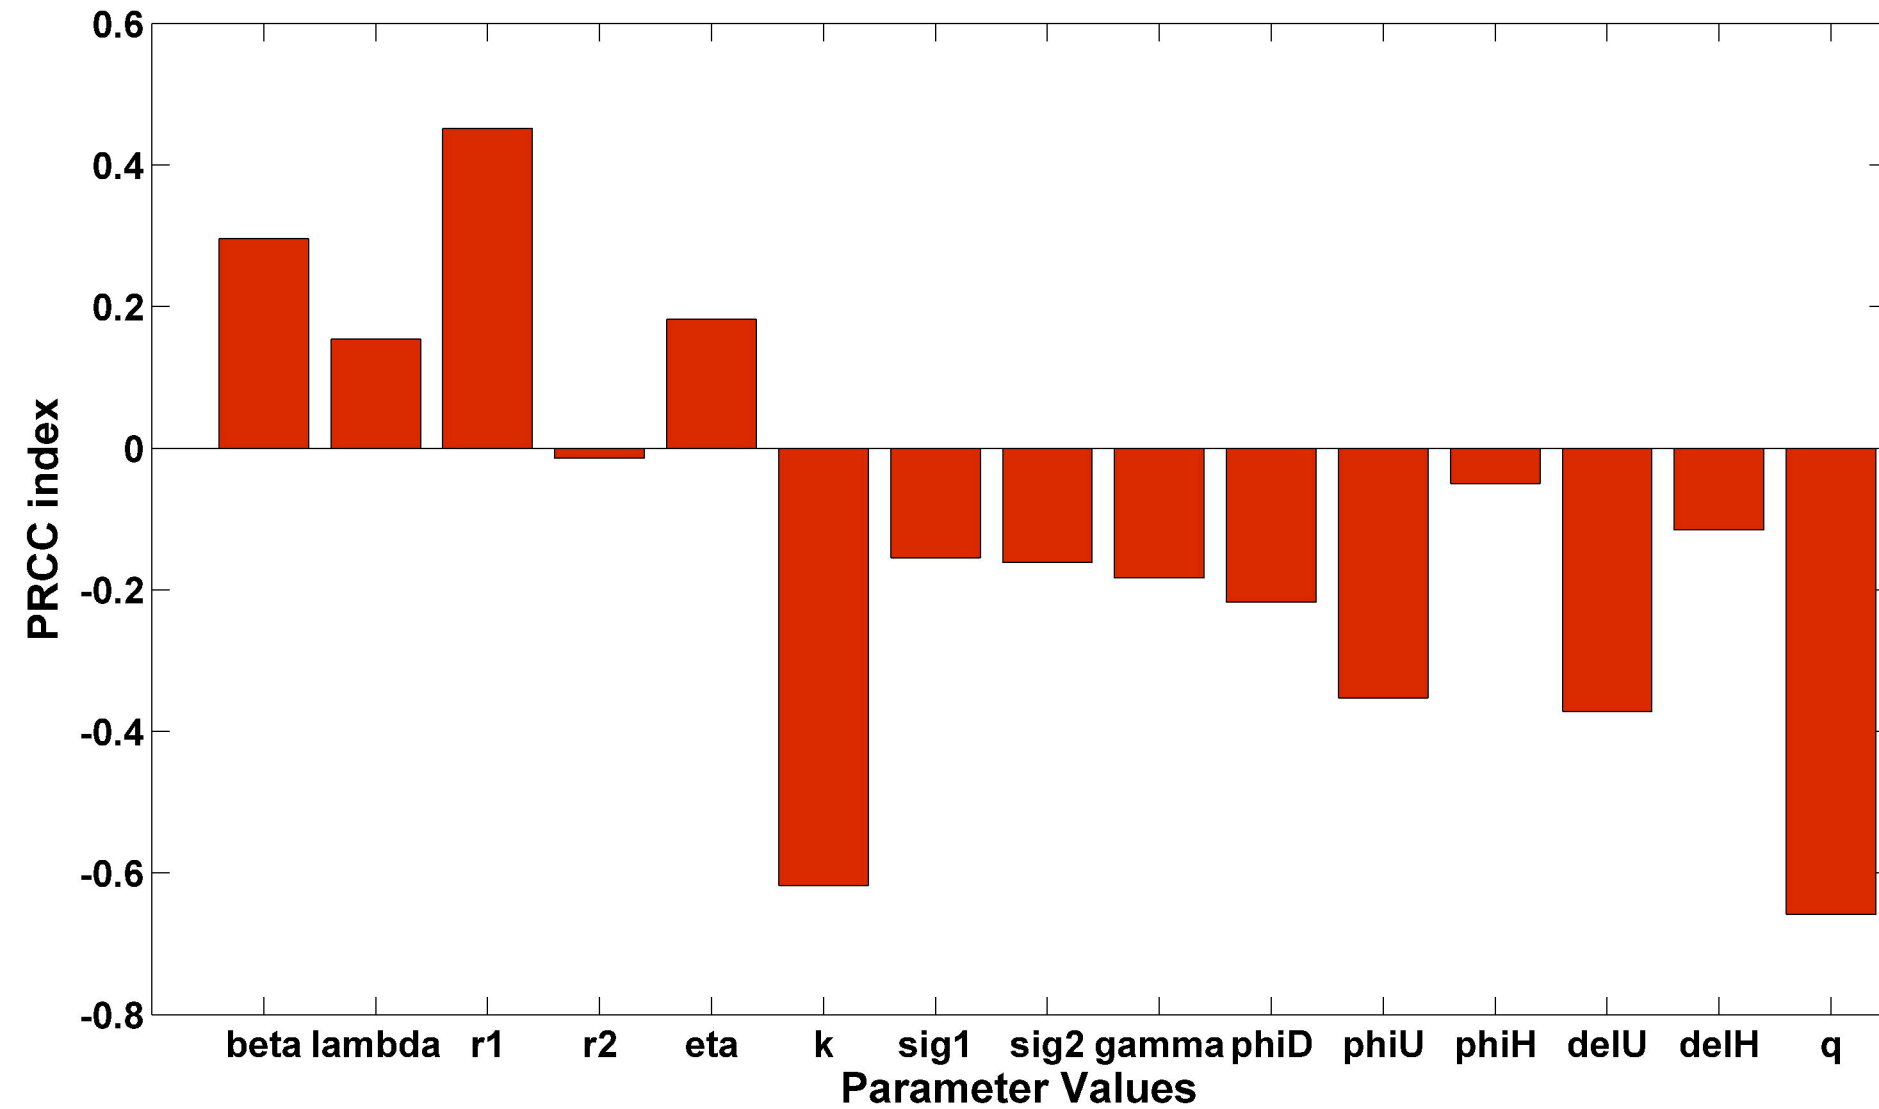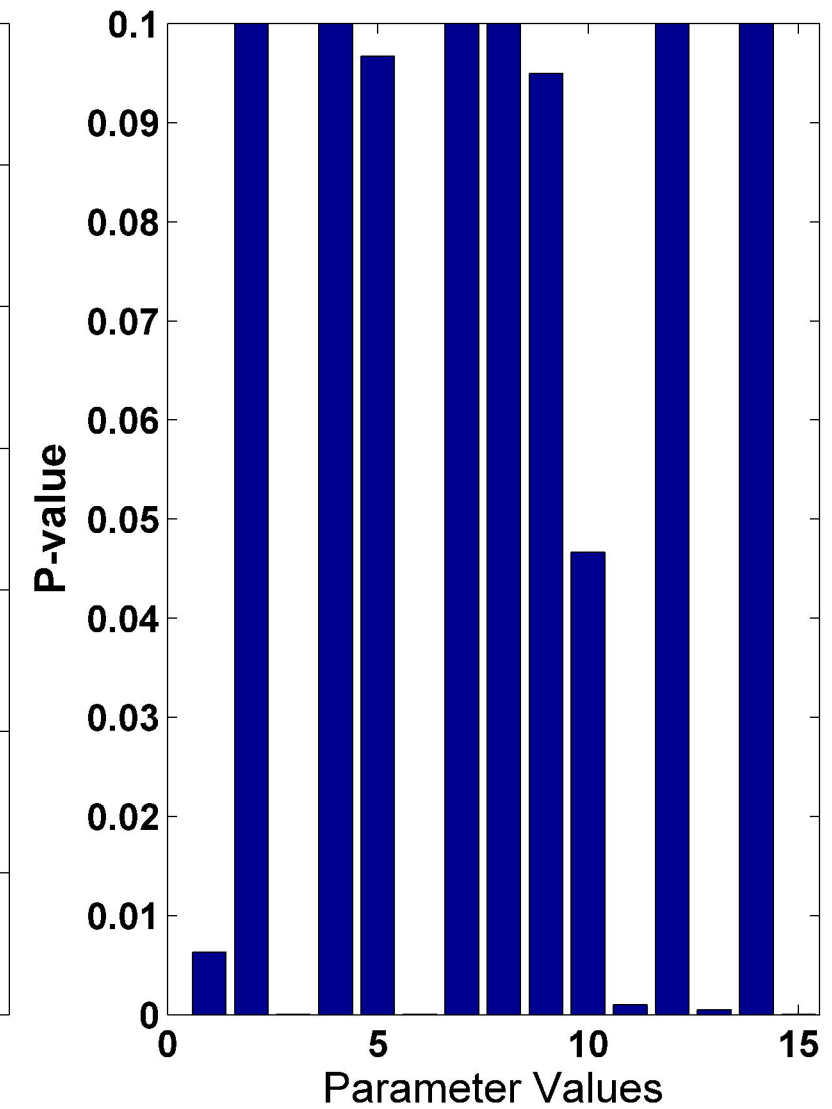

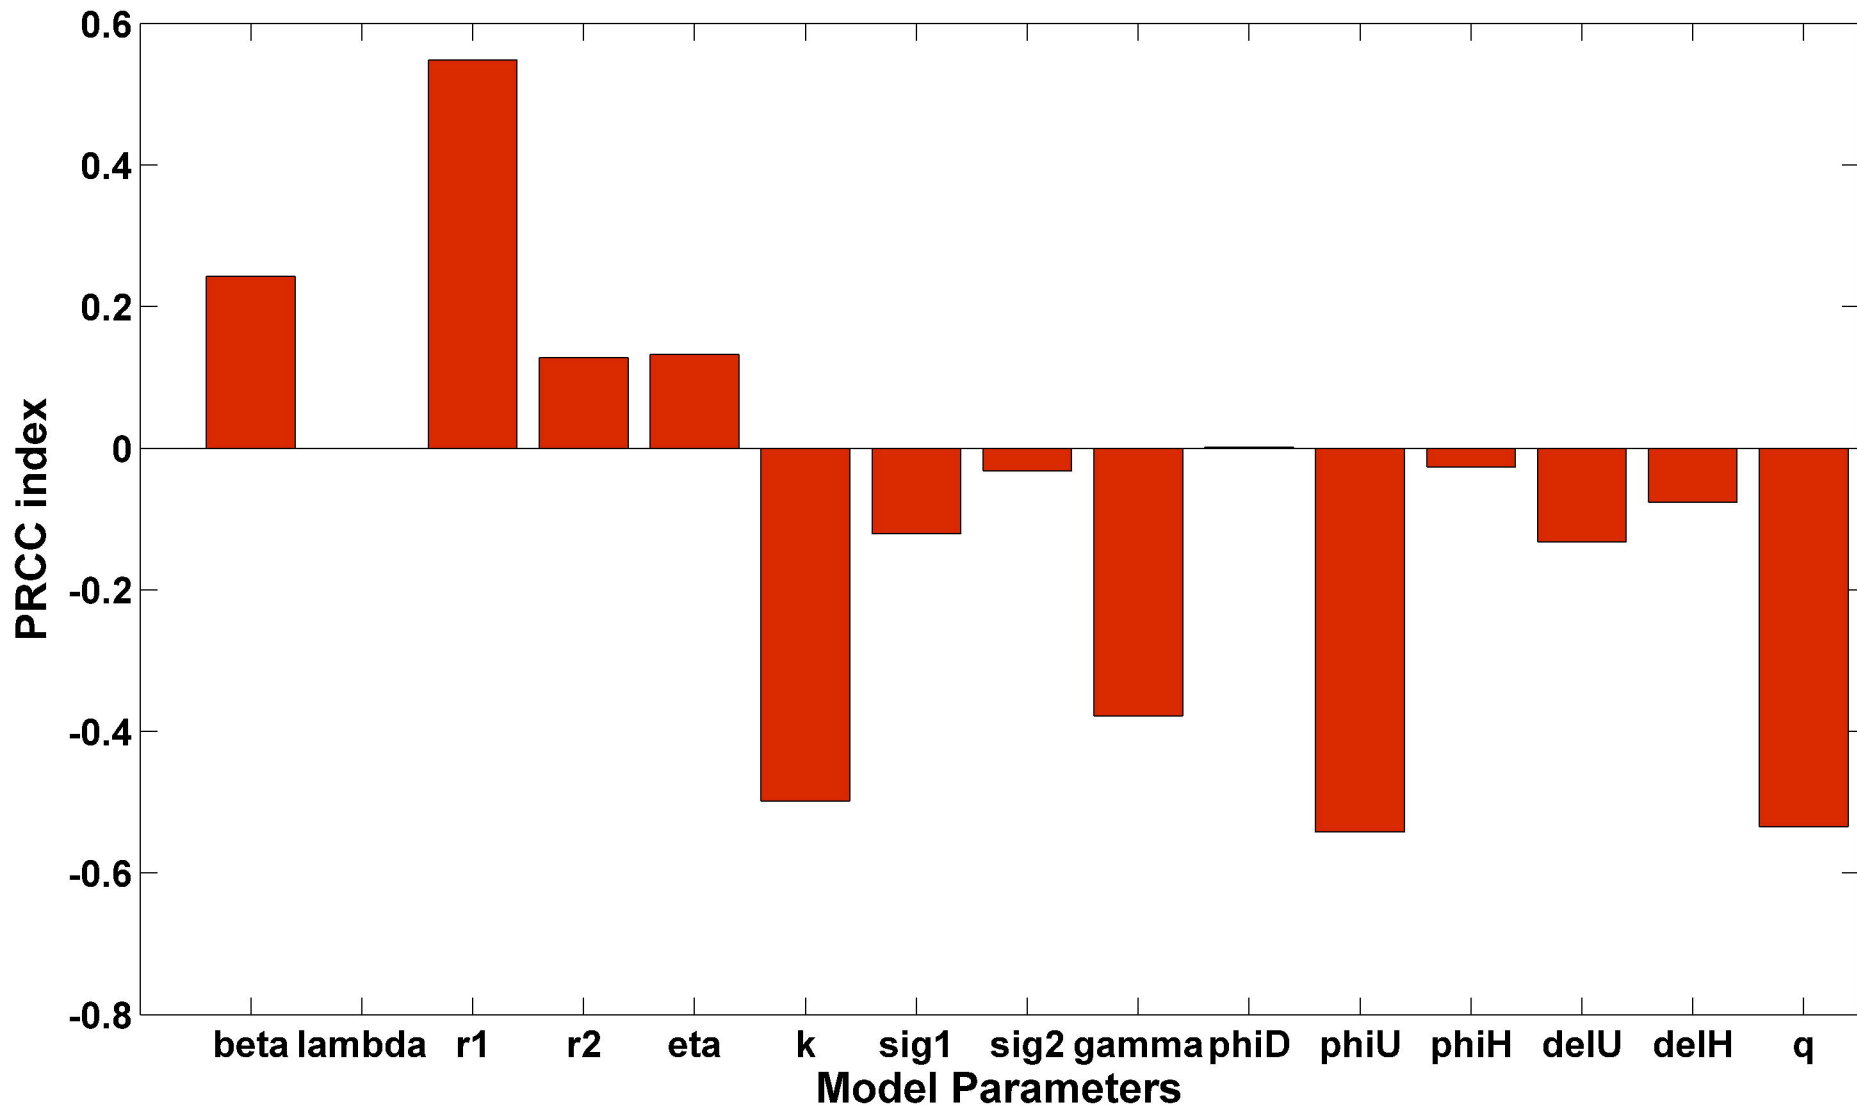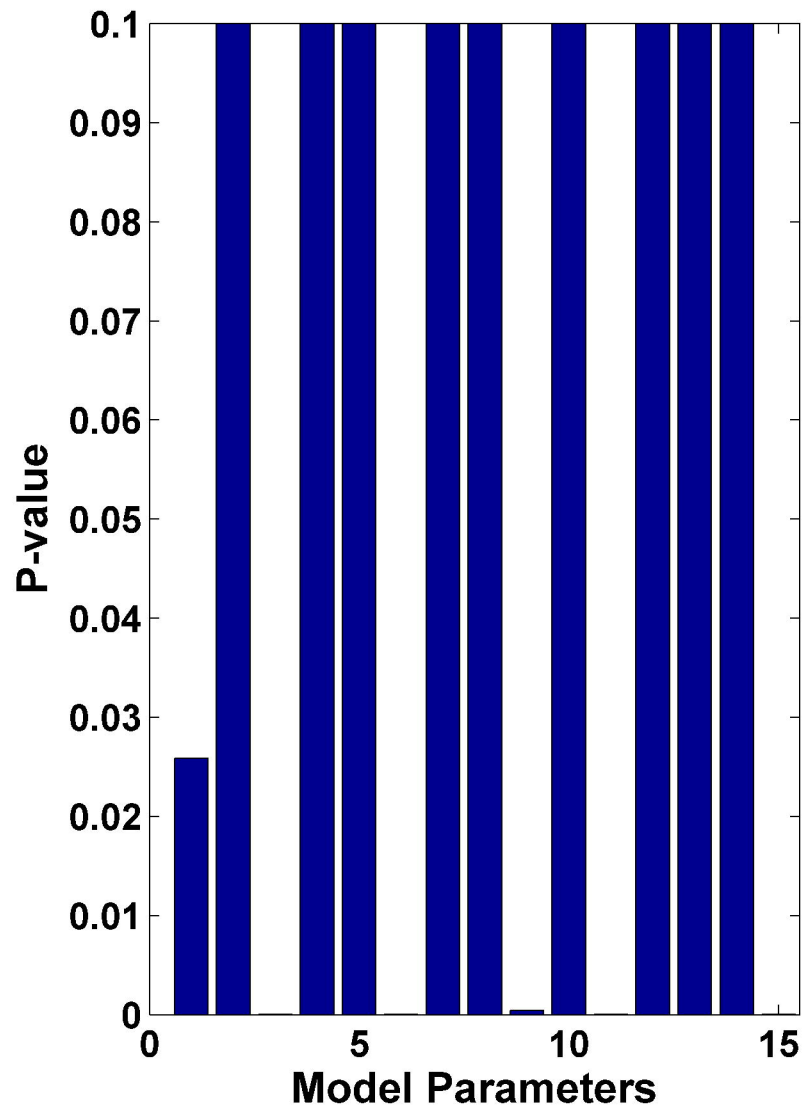

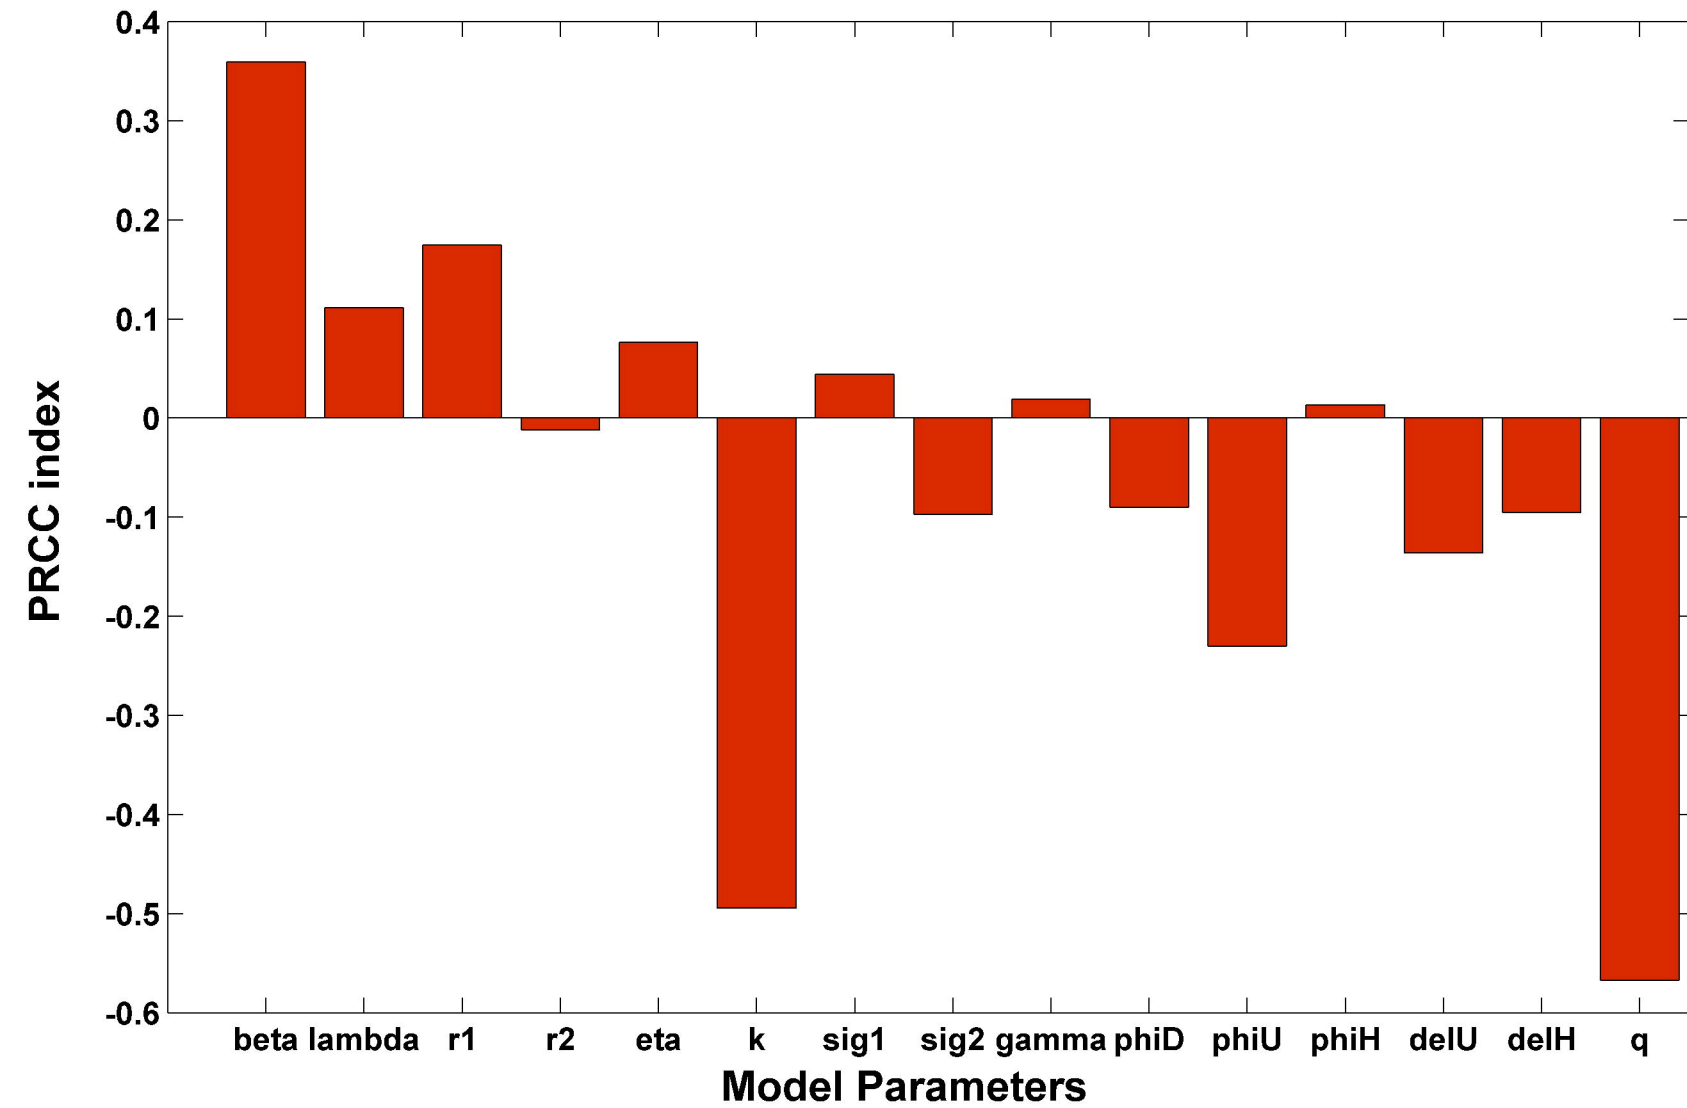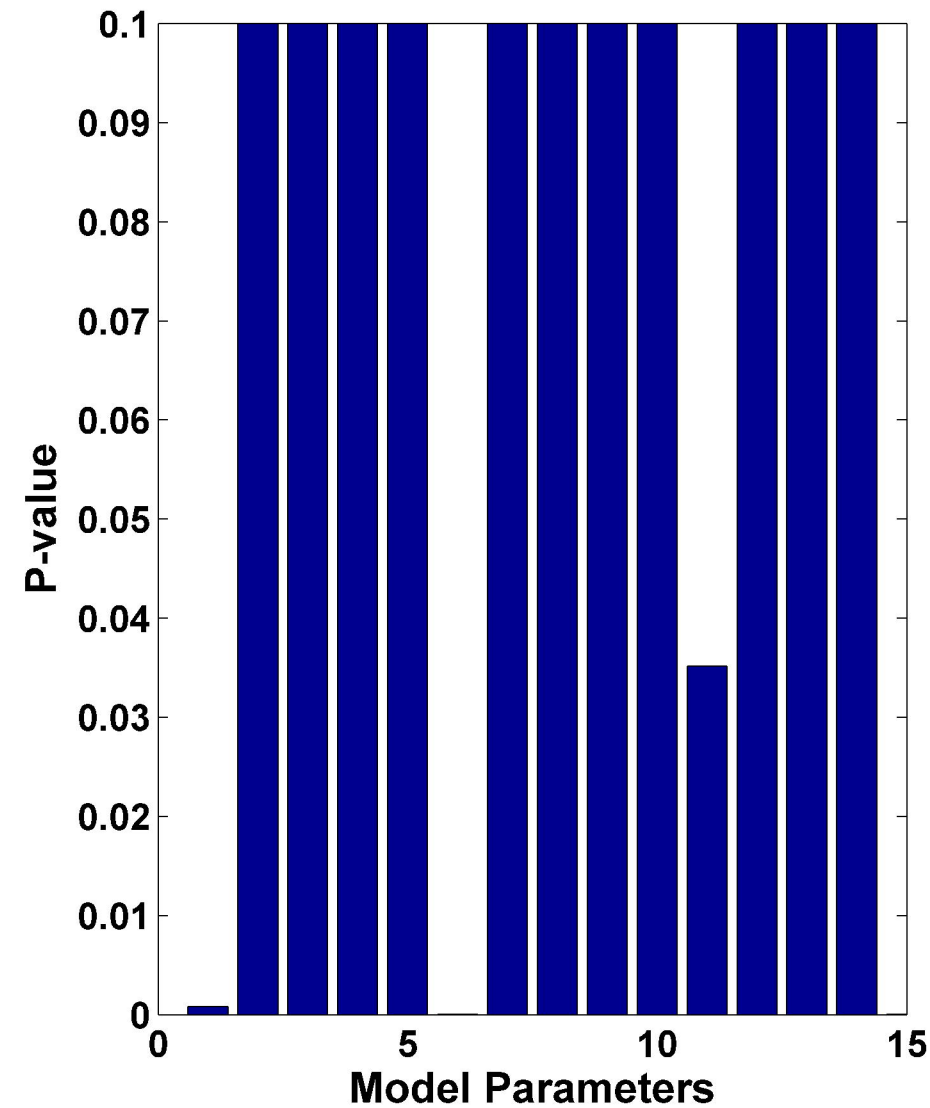

# Russia

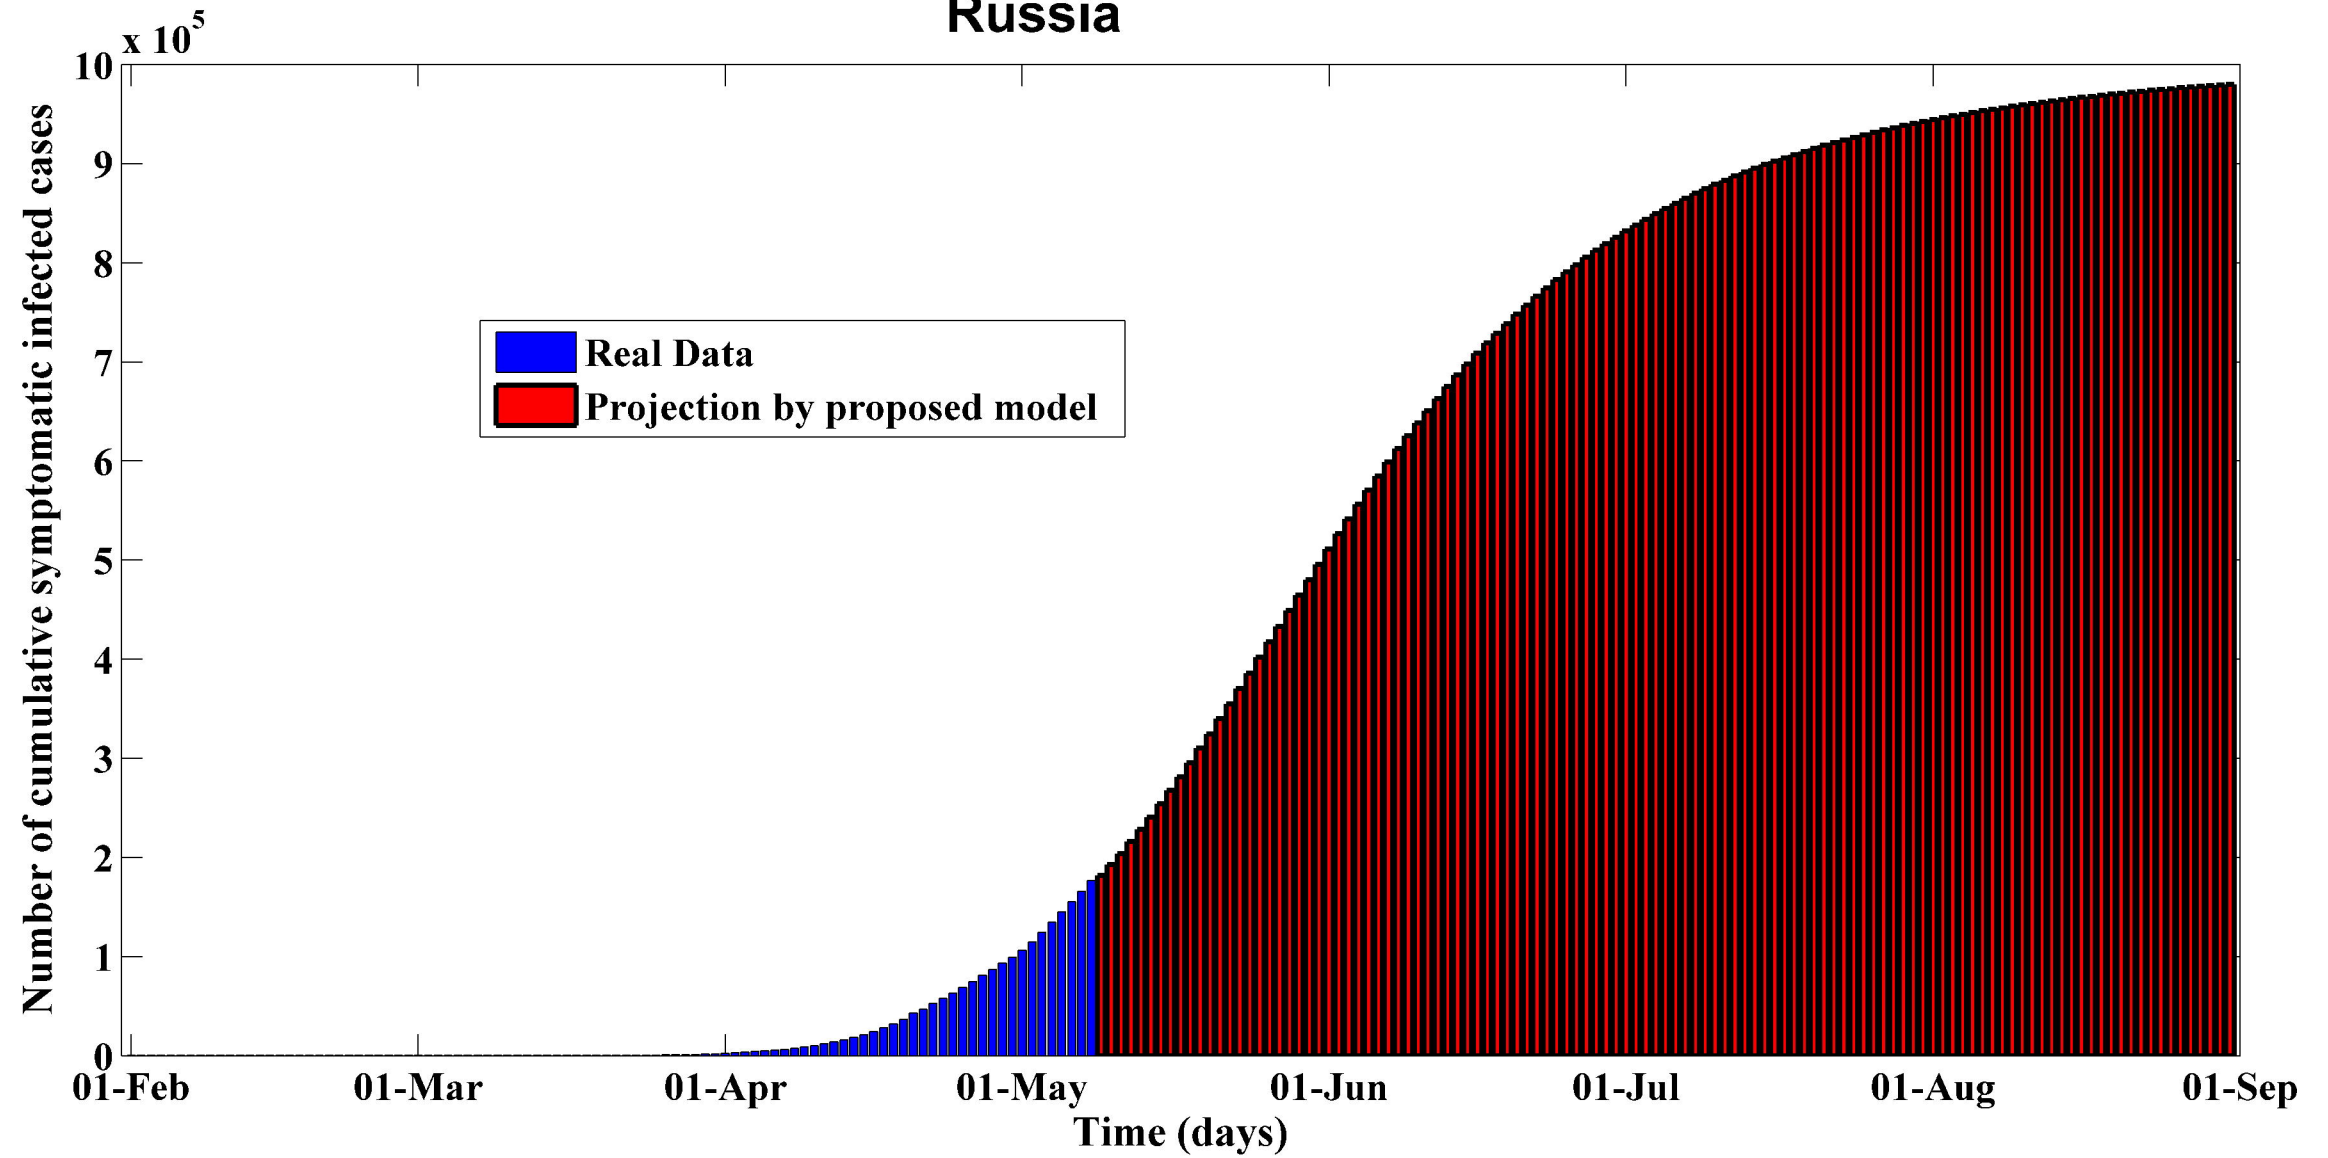

# Russia

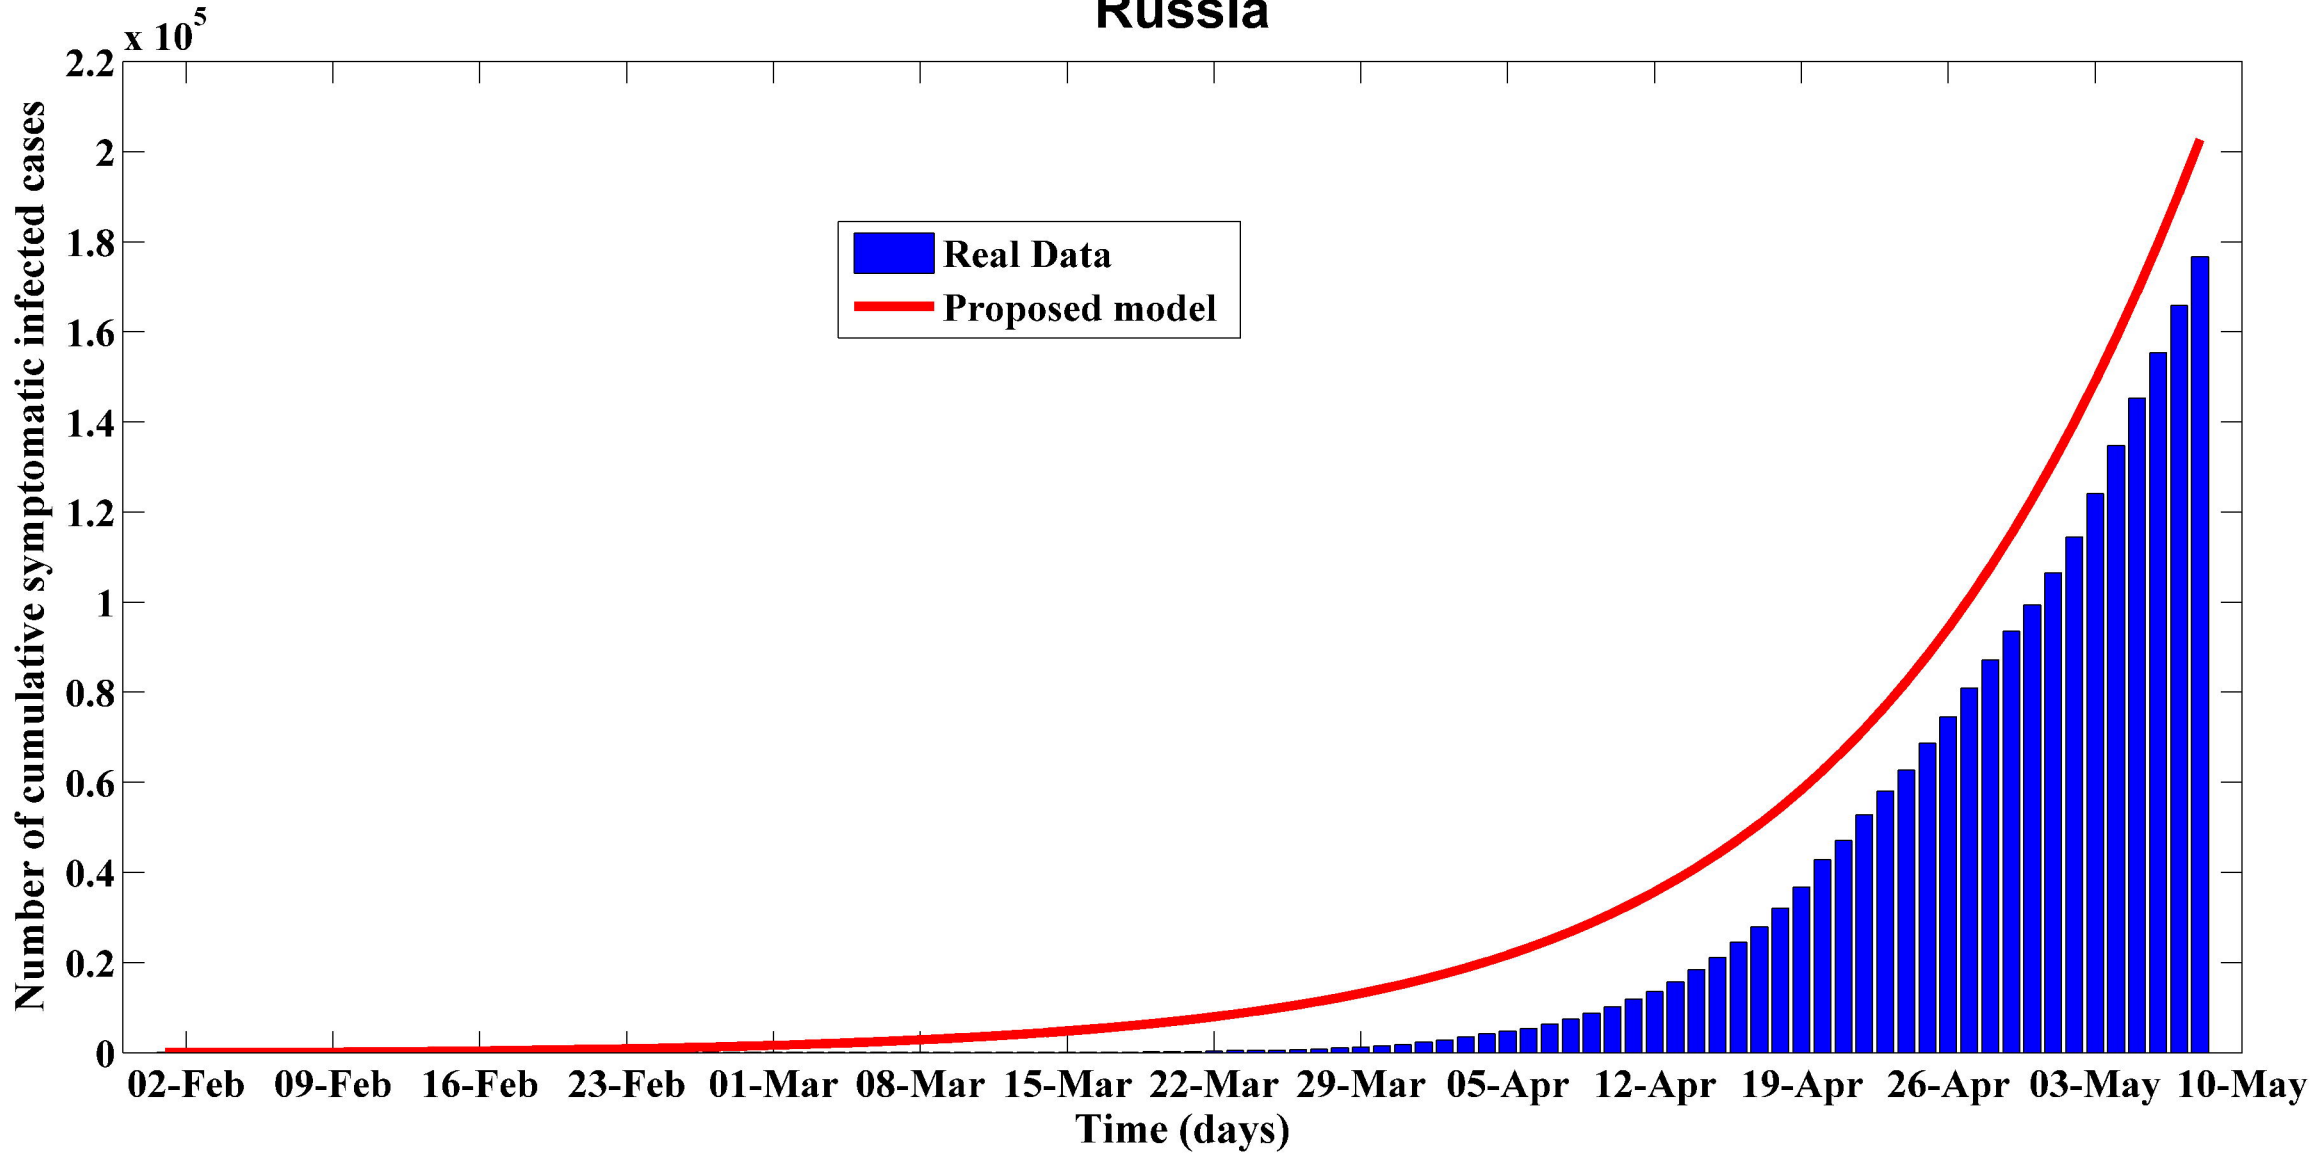



# Russia

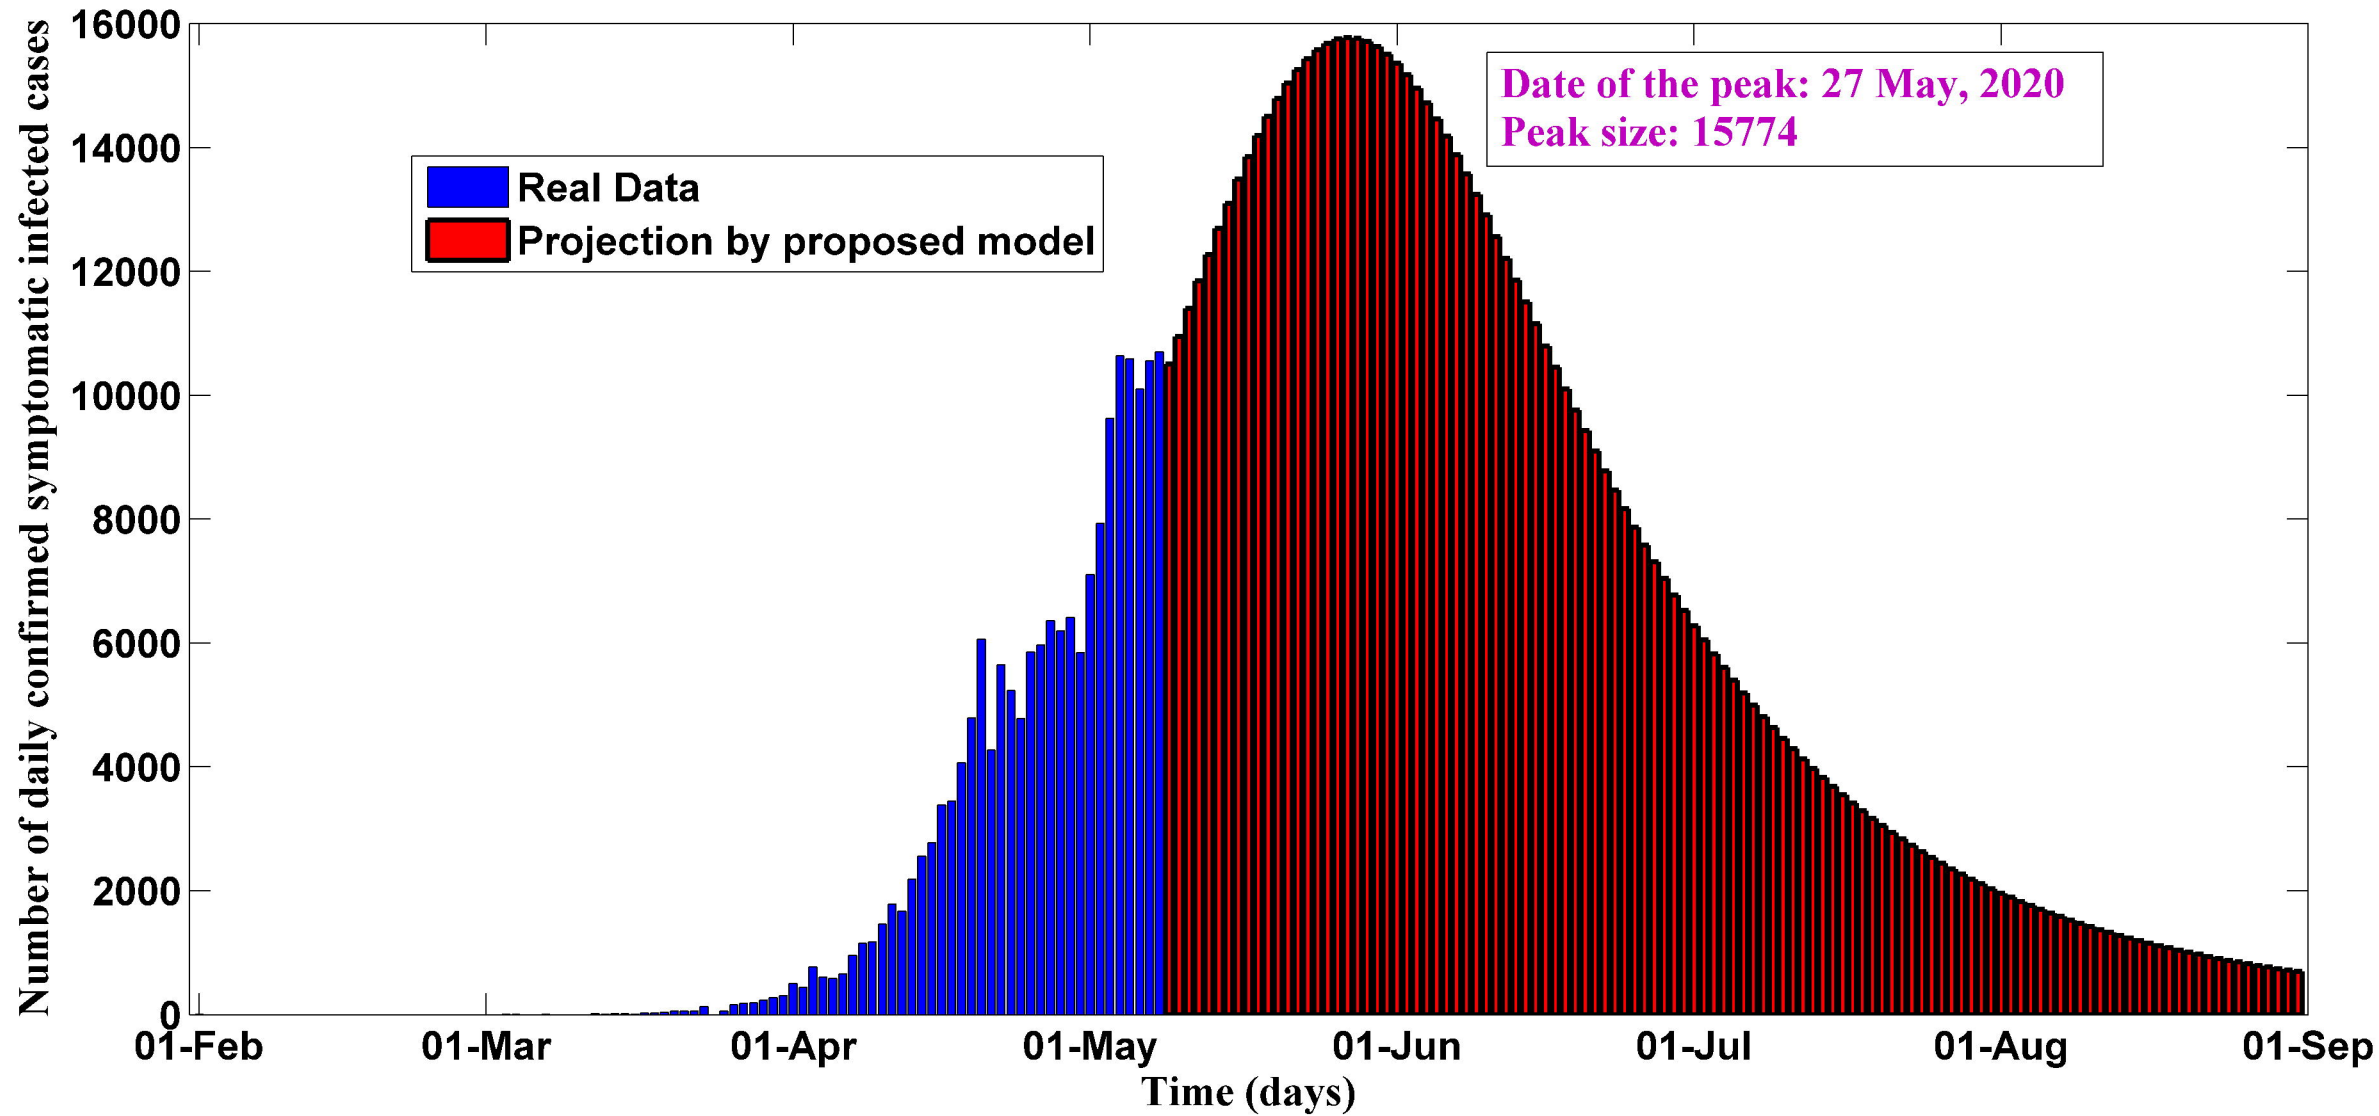

# Russia

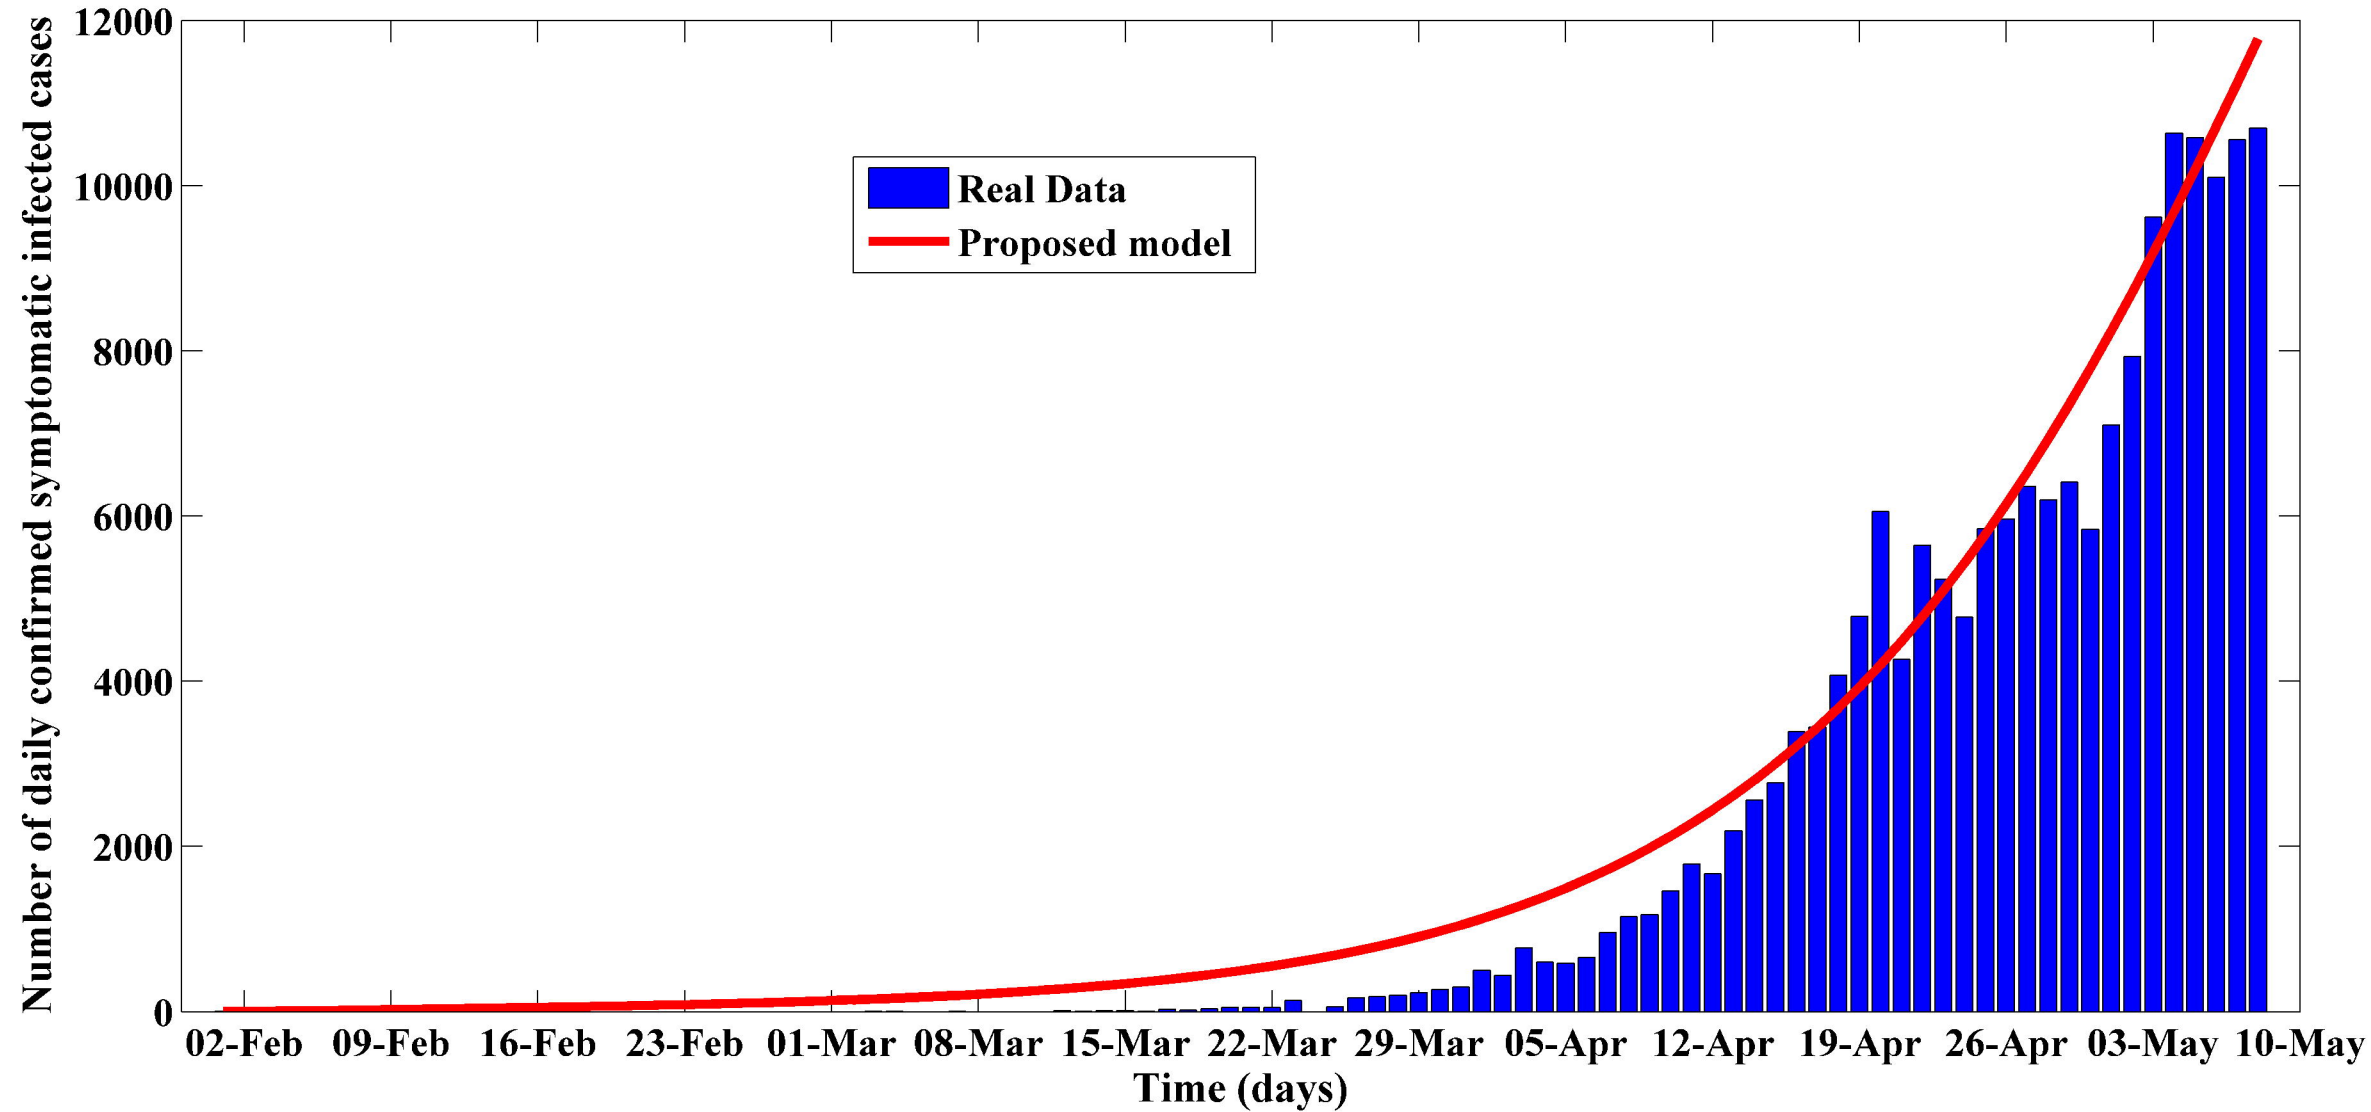

# United Kingdom

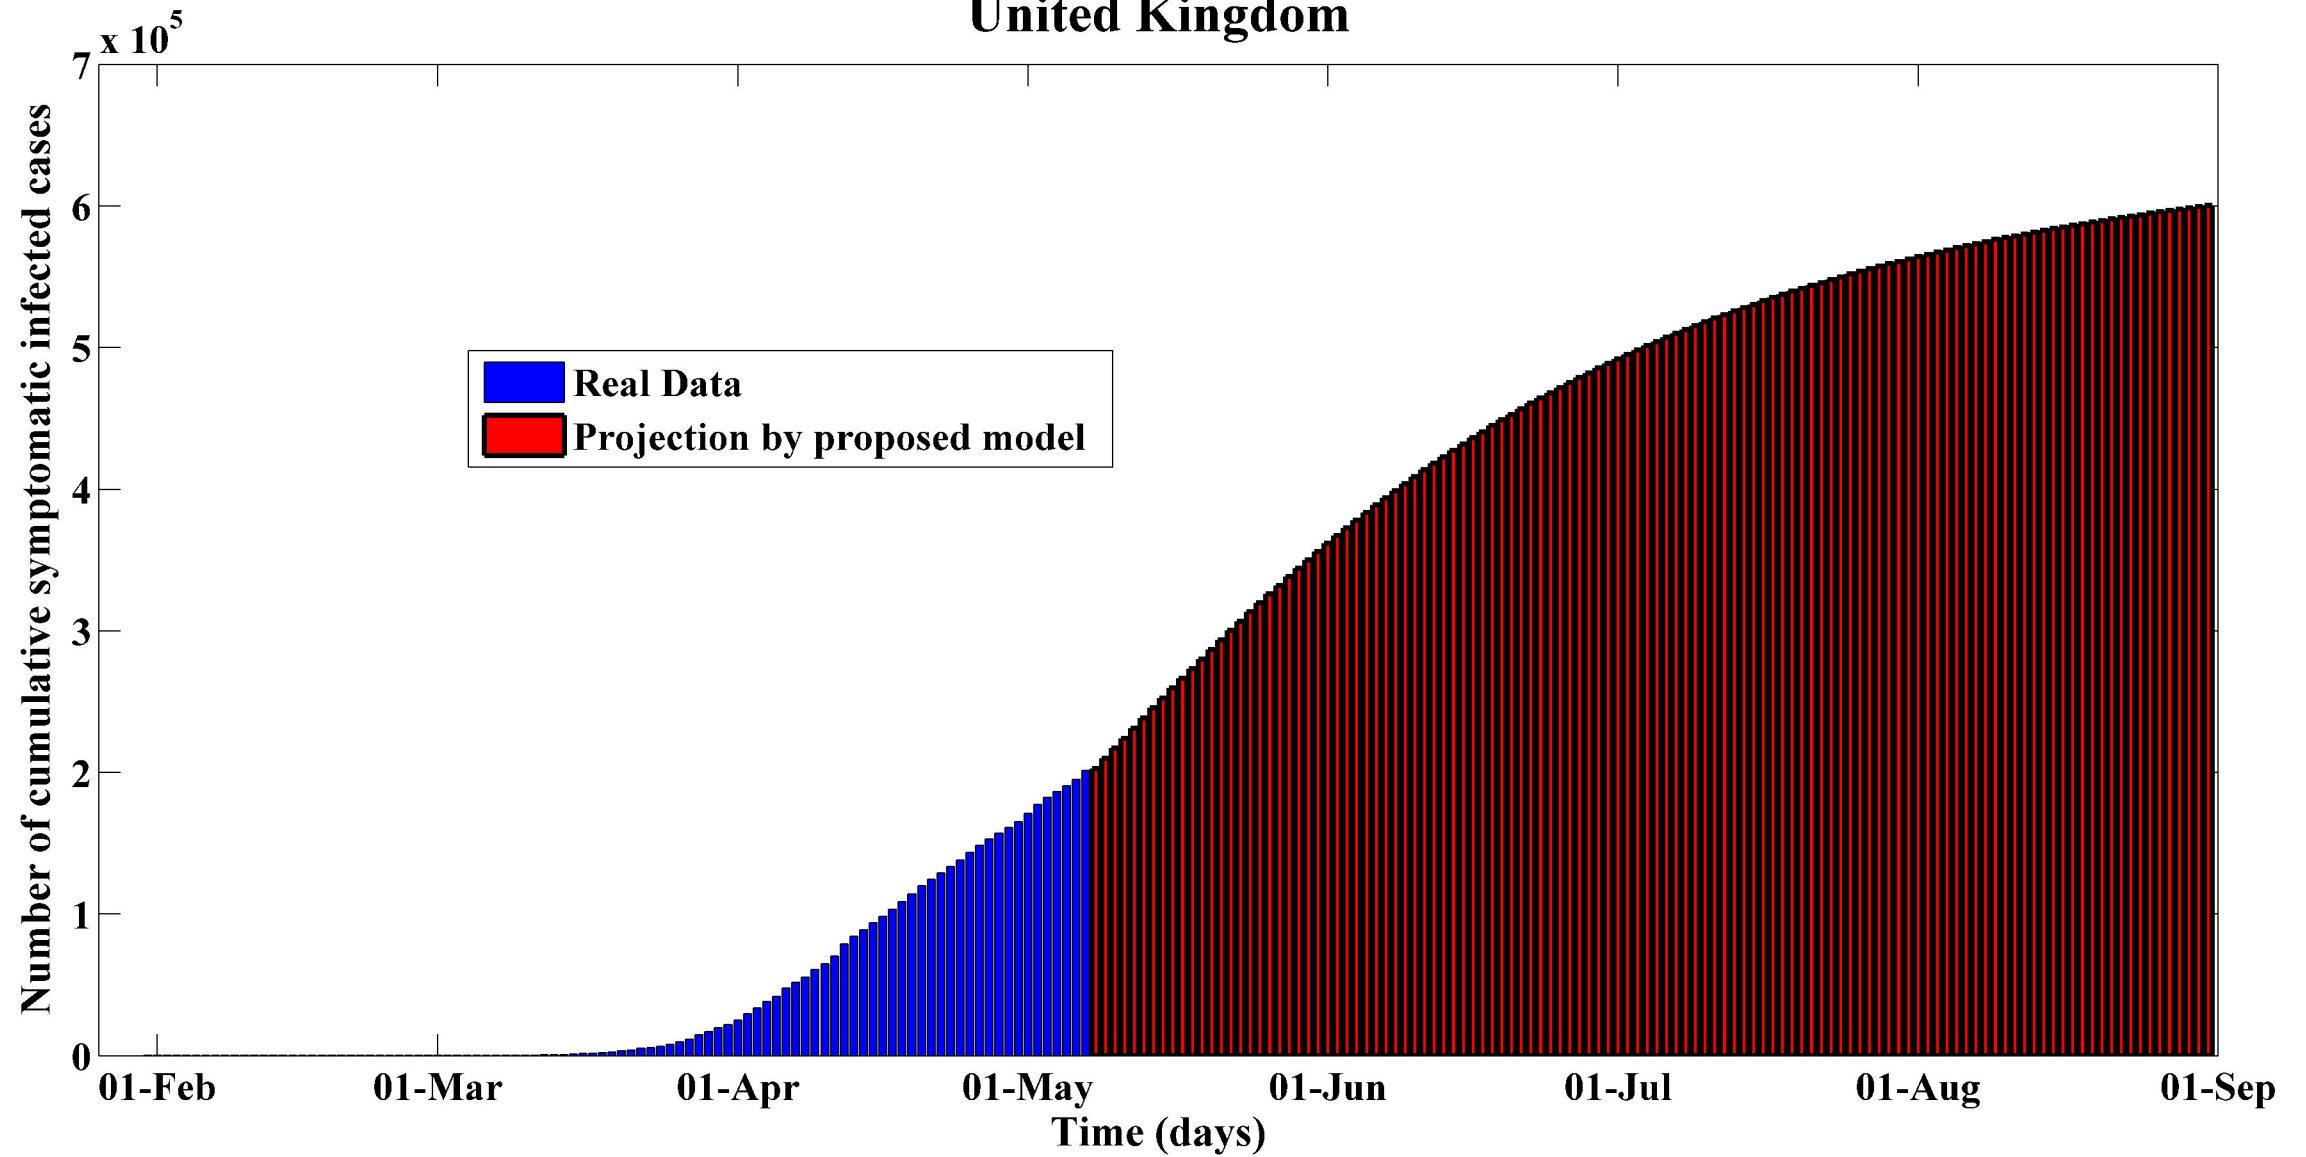

# United Kingdom

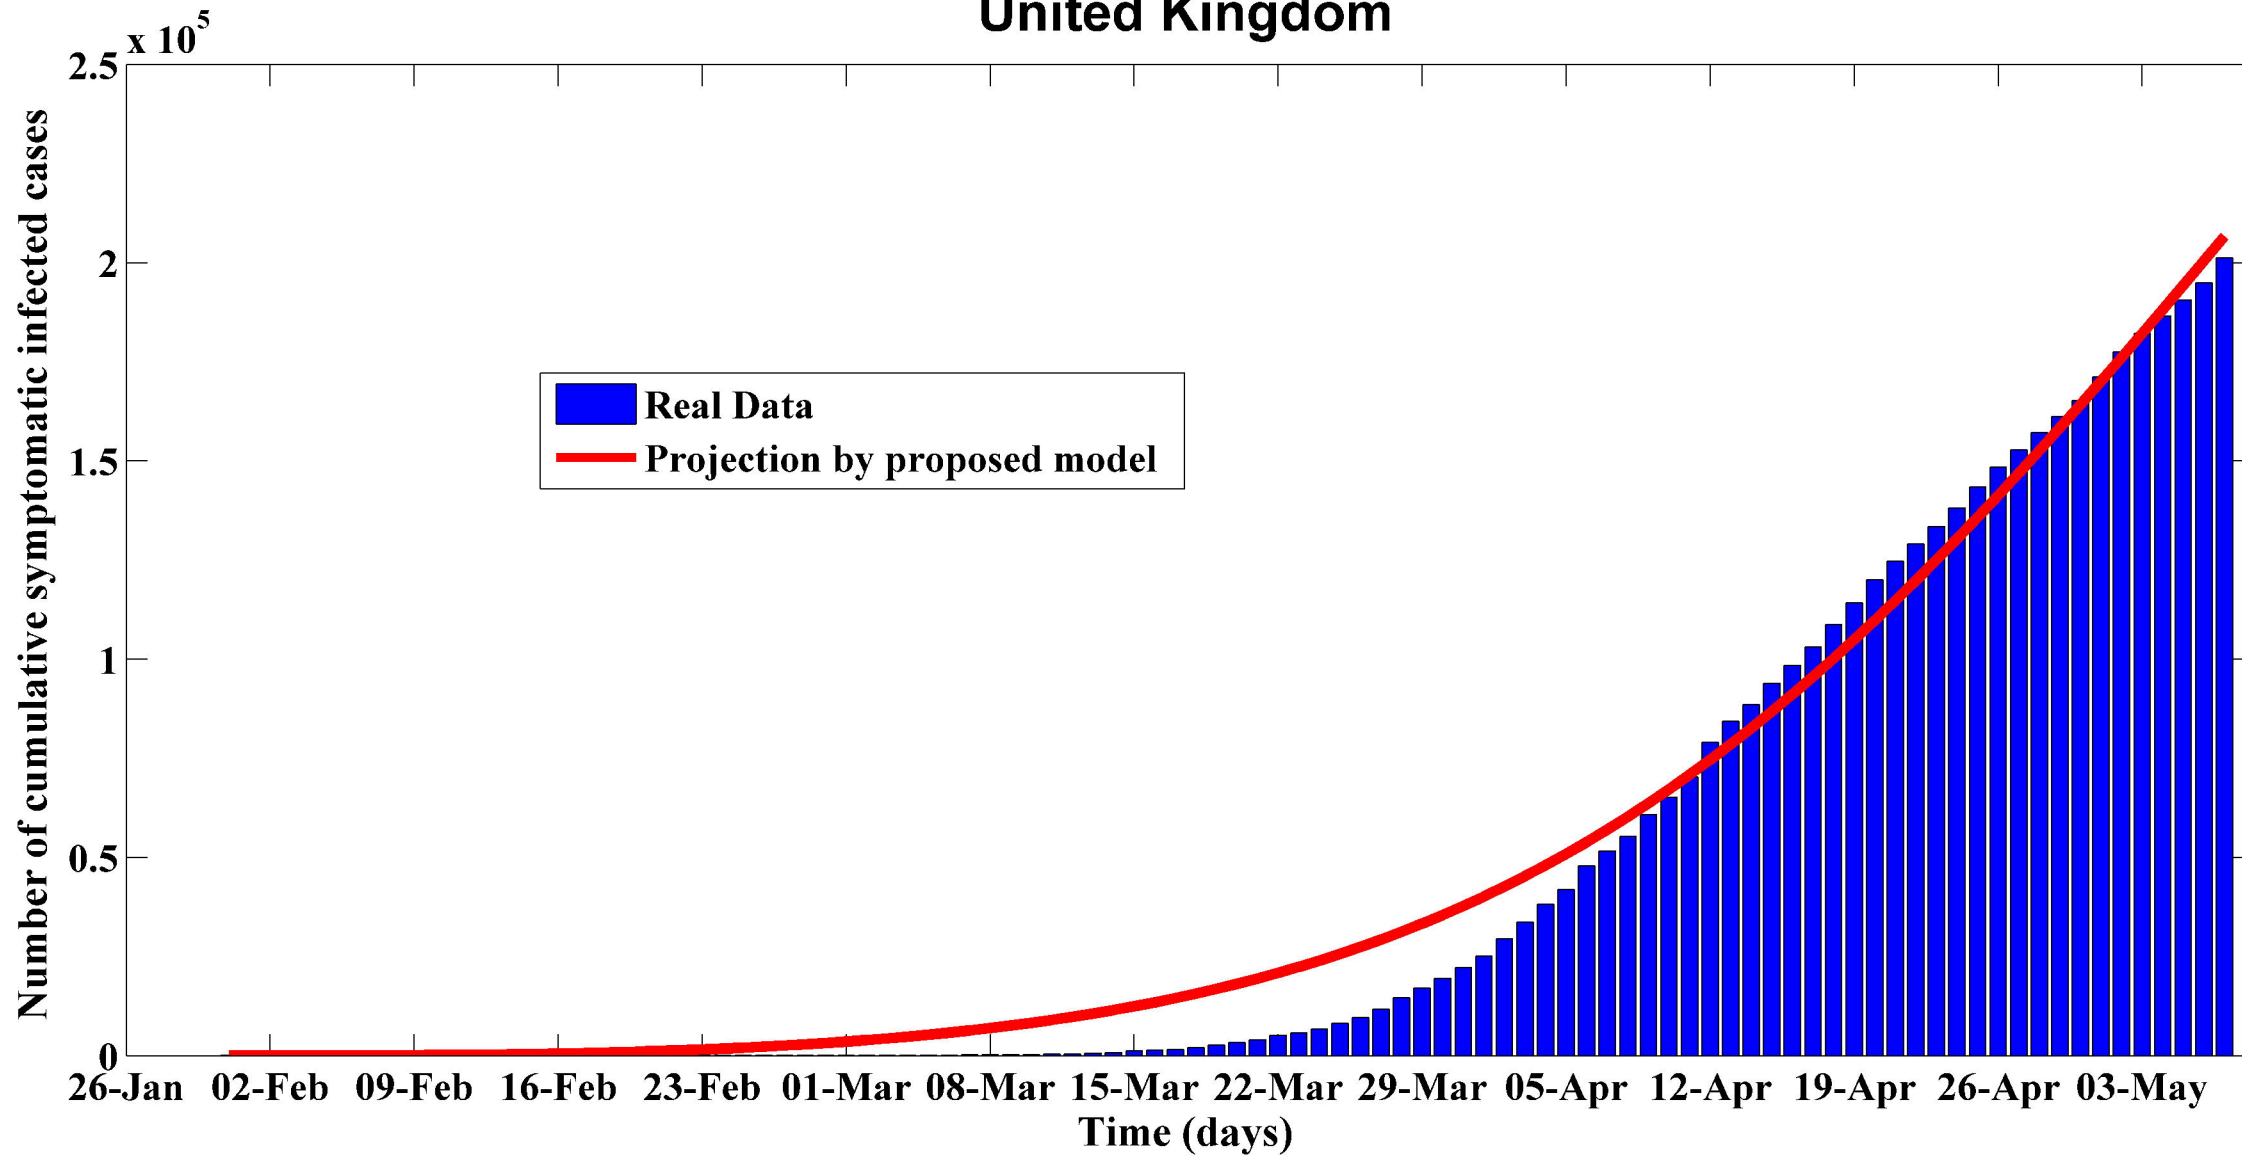

# United Kingdom

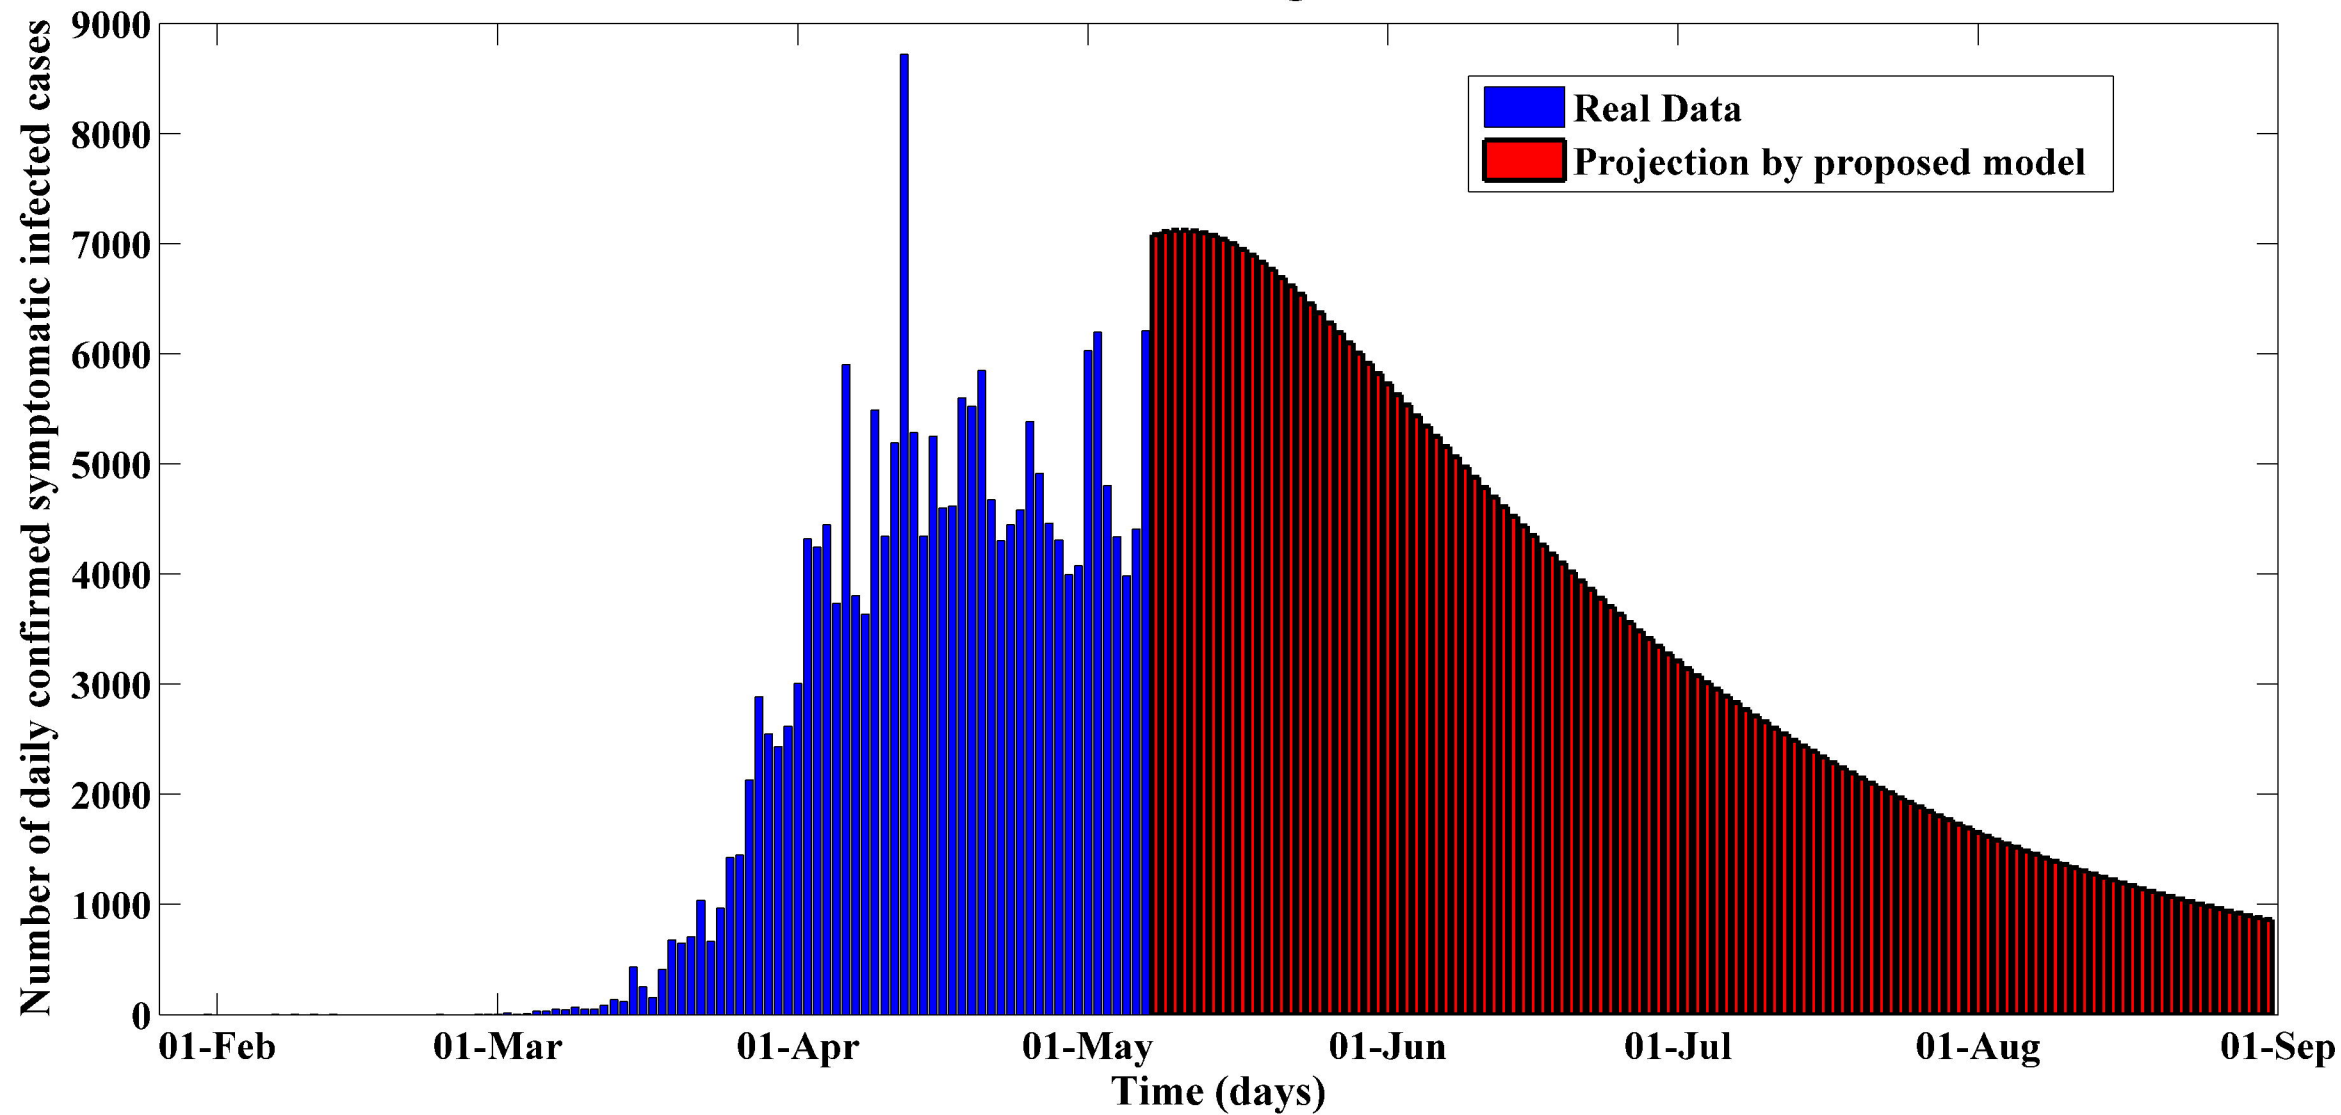

Source: http://medrxiv.org/content/10.1101/2020.05.12.20099192v1.full.pdf
